# Supplementary material for: Rational Design of Simple Organocatalysts for the HSiCl3 Enantioselective Reduction of (E)-N-(1-Phenylethylidene)aniline
Source: MDPI journal article supplement (doi:10.3390/molecules26226963), 2021-11-18
Supplement: s1 [file s1]

# Rational Design of Simple Organocatalysts for the $\text{HSiCl}_3$ Enantioselective Reduction of (E)-*N*-(1-phenylethylidene)aniline

María Maciá <sup>1</sup>, Raúl Porcar <sup>1,2</sup>, Vicente Martí-Centelles <sup>1,3</sup>, Eduardo García-Verdugo <sup>1,\*</sup>, M. Isabel Burguete <sup>1</sup> and Santiago V. Luis <sup>1,\*</sup>

<sup>1</sup> Department of Inorganic and Organic Chemistry, University Jaume I, Av. Vicent Sos Baynat s/n, 12071 Castellón, Spain; maciam@uji.es (M.M.), martiv@uji.es (V.M.-C.), burguete@uji.es (M.I.B.)

<sup>2</sup> Department of Organic and Bio-Organic Chemistry, Faculty of Science, UNED, Avenida de Esparta s/n, 28232 Las Rozas-Madrid, Spain; rporcar@ccia.uned.es (R.P)

<sup>3</sup> Interuniversity Research Institute of Molecular Recognition and Technological Development (IDM), Polytechnic University of Valencia, University of Valencia, Valencia 46022, Spain

\* Correspondence: cepeda@uji.es (E.G.-V.), luiss@uji.es (S.V.L.)

## Table of contents

|                                                    |     |
|----------------------------------------------------|-----|
| 1. Supporting figures and tables .....             | S2  |
| 2. Kinetic fitting data .....                      | S21 |
| 3. Computational calculations .....                | S30 |
| 4. Synthetic procedures and characterization ..... | S52 |
| 5. NMR spectra.....                                | S58 |
| 6. References.....                                 | S72 |



**Table S2.** Asymmetric reduction with different catalyst loadings (Reaction conditions: **[1]** = 0.512 M)

$\text{HSiCl}_3$  (1.5 equiv.)  
Catalyst  
 $\text{CH}_2\text{Cl}_2$ , 0 °C, 16 h

**1**  **2**

| Entry | Cat. | mol% Cat. (%) | Conv. <sup>a</sup> (%) | Yield <sup>a</sup> (%) | ee <sup>b</sup> (%) | ACE   |
|-------|------|---------------|------------------------|------------------------|---------------------|-------|
| 1     | 3    | 5             | 93                     | 79                     | 70                  | 6.73  |
| 2     | 3    | 10            | 96                     | 88                     | 83                  | 4.44  |
| 3     | 3    | 20            | 99                     | 98                     | 85                  | 2.53  |
| 4     | 3    | 30            | 98                     | 97                     | 85                  | 1.67  |
| 5     | 3    | 40            | 91                     | 91                     | 85                  | 1.18  |
| 6     | 4    | 5             | 47                     | 47                     | 13                  | 0.71  |
| 7     | 4    | 10            | 88                     | 85                     | 37                  | 1.83  |
| 8     | 4    | 20            | 93                     | 76                     | 68                  | 1.51  |
| 9     | 4    | 30            | 86                     | 67                     | 79                  | 1.03  |
| 10    | 4    | 40            | 98                     | 83                     | 85                  | 1.03  |
| 11    | 6    | 5             | 84                     | 75                     | 36                  | 3.50  |
| 12    | 6    | 10            | 92                     | 82                     | 47                  | 2.50  |
| 13    | 6    | 20            | 90                     | 81                     | 80                  | 2.10  |
| 14    | 6    | 30            | 92                     | 84                     | 79                  | 1.43  |
| 15    | 6    | 40            | 99                     | 94                     | 81                  | 1.23  |
| 16    | 8    | 5             | 95                     | 94                     | 85                  | 12.39 |
| 17    | 8    | 10            | 95                     | 95                     | 91                  | 6.70  |
| 18    | 8    | 20            | 99                     | 99                     | 89                  | 3.41  |
| 19    | 8    | 30            | 99                     | 99                     | 90                  | 2.30  |
| 20    | 8    | 40            | 99                     | 99                     | 88                  | 1.69  |

<sup>a</sup> Conversions and yields determined by <sup>1</sup>H-NMR on the crude of the reaction. <sup>b</sup> Enantiomeric excess determined by chiral HPLC (*S* configuration for the major enantiomer).

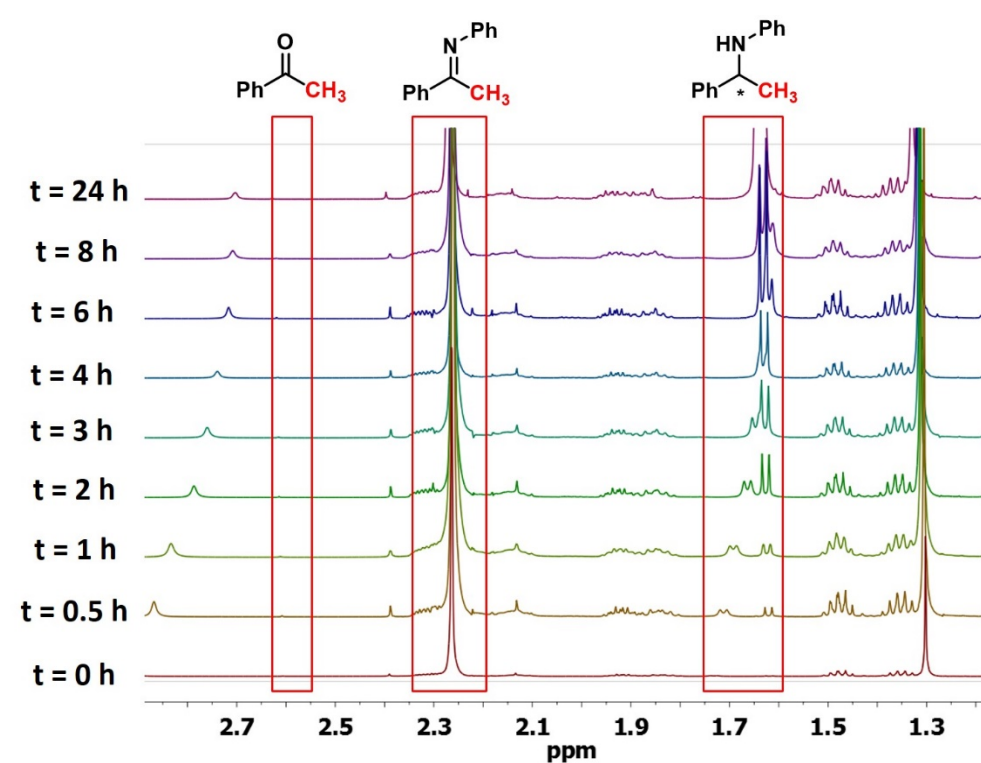

**Figure S1.** <sup>1</sup>H-NMR spectra obtained for the *in situ* reduction of ketimine 1 with HSiCl<sub>3</sub> (1.5 equiv.) in CDCl<sub>3</sub> at 0 °C, catalyzed by 8 (10 mol%). Spectra were acquired at 30 °C and 500 MHz.



$$[C]_{\text{theoretical}} = \frac{[A]_0[B]_0(1 - e^{([B]_0 - [A]_0)kt})}{[A]_0 - [B]_0 \cdot e^{([B]_0 - [A]_0)kt}}$$

Theoretical concentration of product according to the kinetic model.

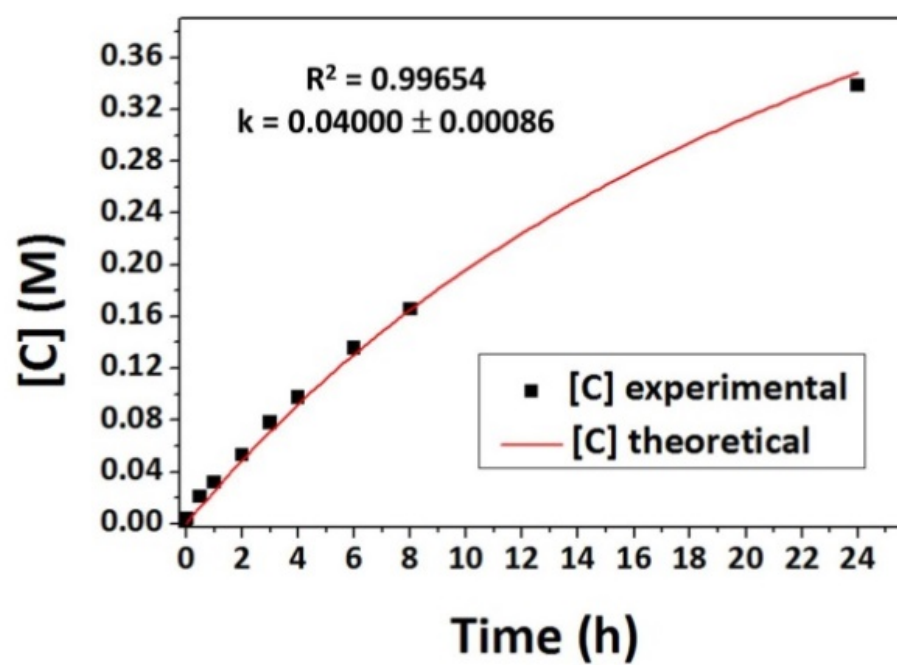

**Figure S2.** Fitting of the experimental data to the kinetic model for the reduction of the ketimine **1** with  $\text{HSiCl}_3$  (1.5 equiv.) catalyzed by compound **3** (10 mol%) ( $^1\text{H}$ -NMR study in  $\text{CDCl}_3$ ).

**Table S3.** Enantioselective reduction of the ketimine **1** at different concentrations of the catalyst **6** while maintaining constant the catalyst molar percentage (40 mol%)

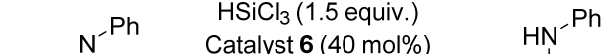

| Entry | [Cat <b>6</b> ] (M) | [ <b>1</b> ] (M) | Conv. <sup>a</sup> (%) | Yield <sup>a</sup> (%) | <i>ee</i> <sup>b</sup> (%) |
|-------|---------------------|------------------|------------------------|------------------------|----------------------------|
| 1     | 0.500               | 1.250            | 99                     | 91                     | 81                         |
| 2     | 0.205               | 0.512            | 99                     | 94                     | 81                         |
| 3     | 0.100               | 0.250            | 69                     | 65                     | 84                         |
| 4     | 0.010               | 0.025            | 13                     | 9                      | 40                         |

<sup>a</sup>Conversions and yields determined by <sup>1</sup>H-NMR on the crude of the reaction. <sup>b</sup>Enantiomeric excess determined by chiral HPLC (S configuration for the major enantiomer).

**Table S4.** Enantioselective reduction of the ketimine **1** at different substrate-catalyst ratios while maintaining constant the concentration of the catalyst **6** (0.205 M)

$\text{Ph}-\text{C}(\text{Ph})=\text{N}-\text{Ph}$  (1)
  $\xrightarrow[\text{CH}_2\text{Cl}_2, 0^\circ\text{C}, 16\text{ h}]{\text{HSiCl}_3 (1.5 \text{ equiv.}), \text{Catalyst } \mathbf{6} (0.205 \text{ M})}$ 
 $\text{Ph}-\text{C}(\text{Ph})(\text{H})-\text{N}-\text{Ph}$  (2)

<sup>a</sup> Conversions and yields determined by <sup>1</sup>H-NMR on the crude of the reaction. <sup>b</sup> Enantiomeric excess determined by chiral HPLC (*S* configuration for the major enantiomer).

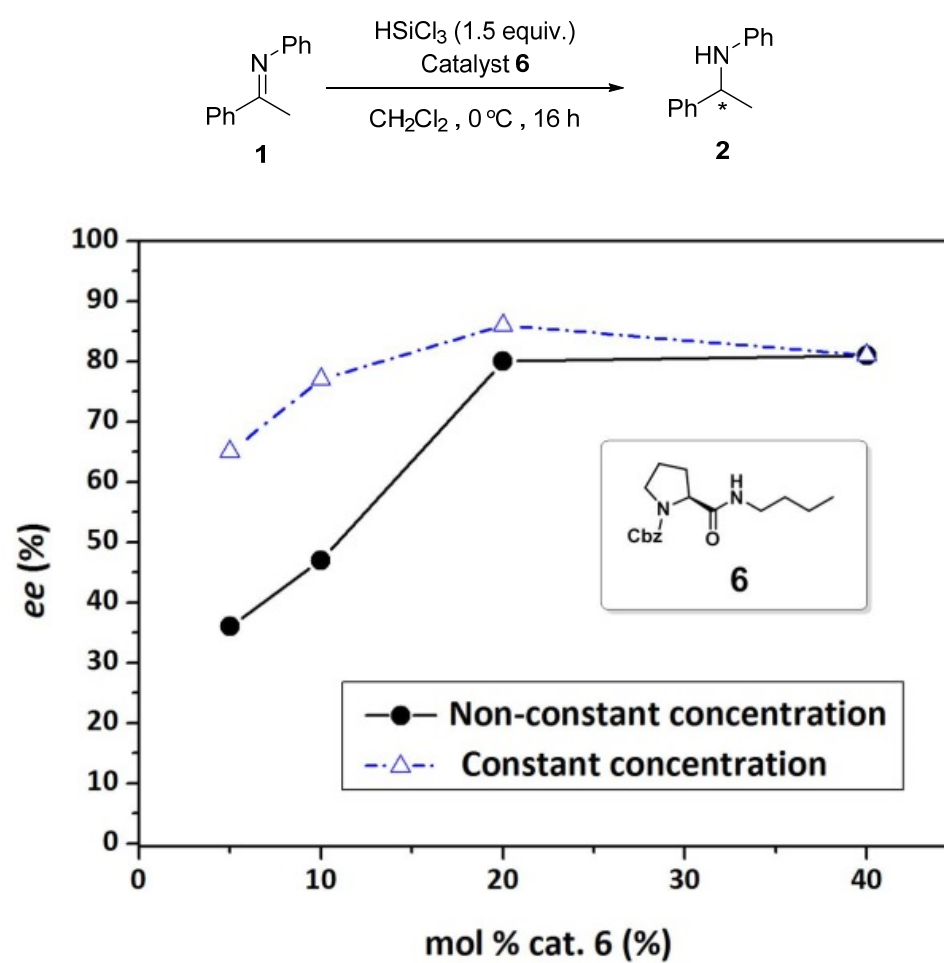

**Figure S3.** Variation of *ee* as a function of the molar percentage of catalyst **6** in the reduction of imine **1**. Black dots: non-constant concentration of catalyst; triangles: constant concentration of catalyst (0.205 M).

**Table S5.** Enantioselective reduction of the ketimine **1** with different concentrations of catalyst **8**, but keeping constant the catalyst : substrate ratio (5 mol%)

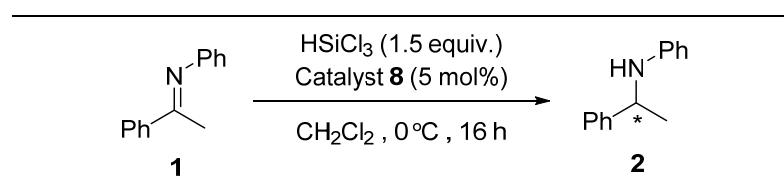

| Entry | [Cat 8] (M) | [1] (M) | Conv. <sup>a</sup> (%) | Yield <sup>a</sup> (%) | ee <sup>b</sup> (%) |
|-------|-------------|---------|------------------------|------------------------|---------------------|
| 1     | 0.026       | 0.512   | 95                     | 94                     | 85                  |
| 2     | 0.205       | 4.000   | 90                     | 80                     | 82                  |

<sup>a</sup>Conversions and yields determined by <sup>1</sup>H-NMR on the crude of the reaction. <sup>b</sup>Enantiomeric excess determined by chiral HPLC (*S* configuration for the major enantiomer).

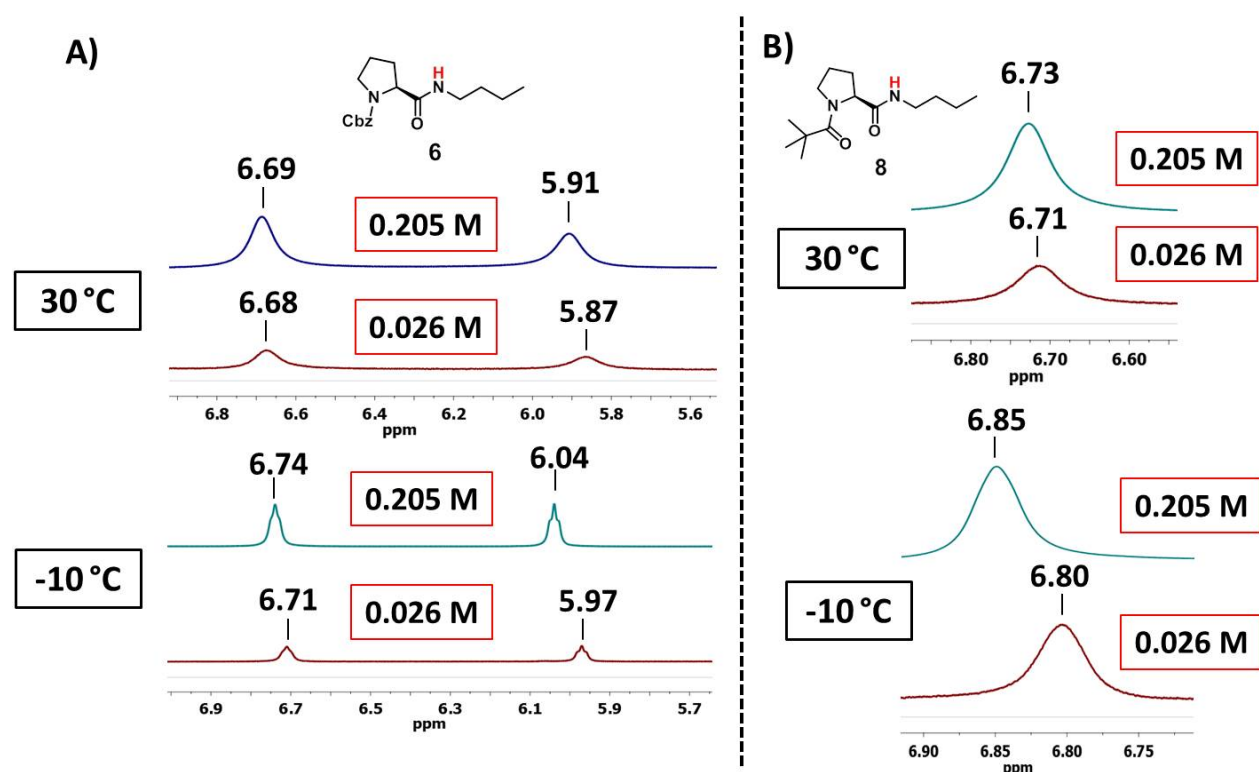

**Figure S4.**  $^1\text{H}$ -RMN spectra for the amide signals at different concentrations and temperatures. A) Proton amide signals of catalyst 6. B) Proton amide signals of catalyst 8.

**Table S6.** Enantioselective reduction using catalysts **10-14**

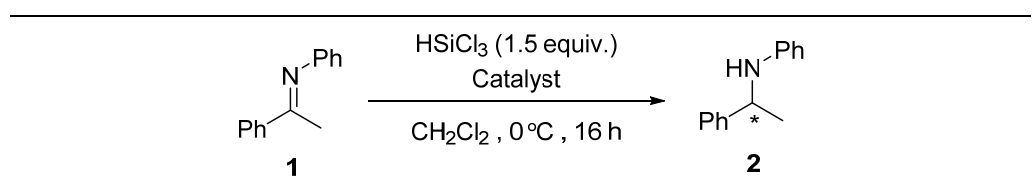

| Entry | Cat | mol%<br>Cat | [Cat]<br>(M) | Conv. <sup>a</sup><br>(%) | Yield <sup>a</sup><br>(%) | ee <sup>b</sup><br>(%) | ACE   |
|-------|-----|-------------|--------------|---------------------------|---------------------------|------------------------|-------|
| 1     | 10  | 40          | 0.205        | 95                        | 91                        | 4                      | 0.04  |
| 2     | 11  | 40          | 0.205        | 96                        | 78                        | 50                     | 0.44  |
| 3     | 12  | 1           | 0.005        | 81                        | 45                        | 28                     | 6.53  |
| 4     | 12  | 10          | 0.051        | 88                        | 79                        | 82                     | 3.36  |
| 5     | 12  | 20          | 0.102        | 98                        | 97                        | 84                     | 2.11  |
| 6     | 12  | 30          | 0.154        | 99                        | 99                        | 83                     | 1.42  |
| 7     | 12  | 40          | 0.205        | 93                        | 85                        | 85                     | 0.94  |
| 8     | 13  | 1           | 0.005        | 95                        | 82                        | 25                     | 11.41 |
| 9     | 13  | 10          | 0.051        | 97                        | 95                        | 83                     | 4.39  |
| 10    | 13  | 20          | 0.102        | 99                        | 98                        | 83                     | 2.26  |
| 11    | 13  | 30          | 0.154        | 99                        | 99                        | 82                     | 1.50  |
| 12    | 13  | 40          | 0.205        | 99                        | 98                        | 83                     | 1.13  |
| 13    | 14  | 1           | 0.005        | 85                        | 71                        | 0                      | 0.00  |
| 14    | 14  | 10          | 0.051        | 86                        | 71                        | 10                     | 0.38  |
| 15    | 14  | 20          | 0.102        | 88                        | 68                        | 17                     | 0.31  |
| 16    | 14  | 30          | 0.154        | 88                        | 55                        | 43                     | 0.42  |
| 17    | 14  | 40          | 0.205        | 92                        | 85                        | 83                     | 0.94  |

<sup>a</sup> Conversions and yields determined by <sup>1</sup>H-NMR on the crude reaction mixture. <sup>b</sup> Enantiomeric excess determined by chiral HPLC (S configuration for the major enantiomer).

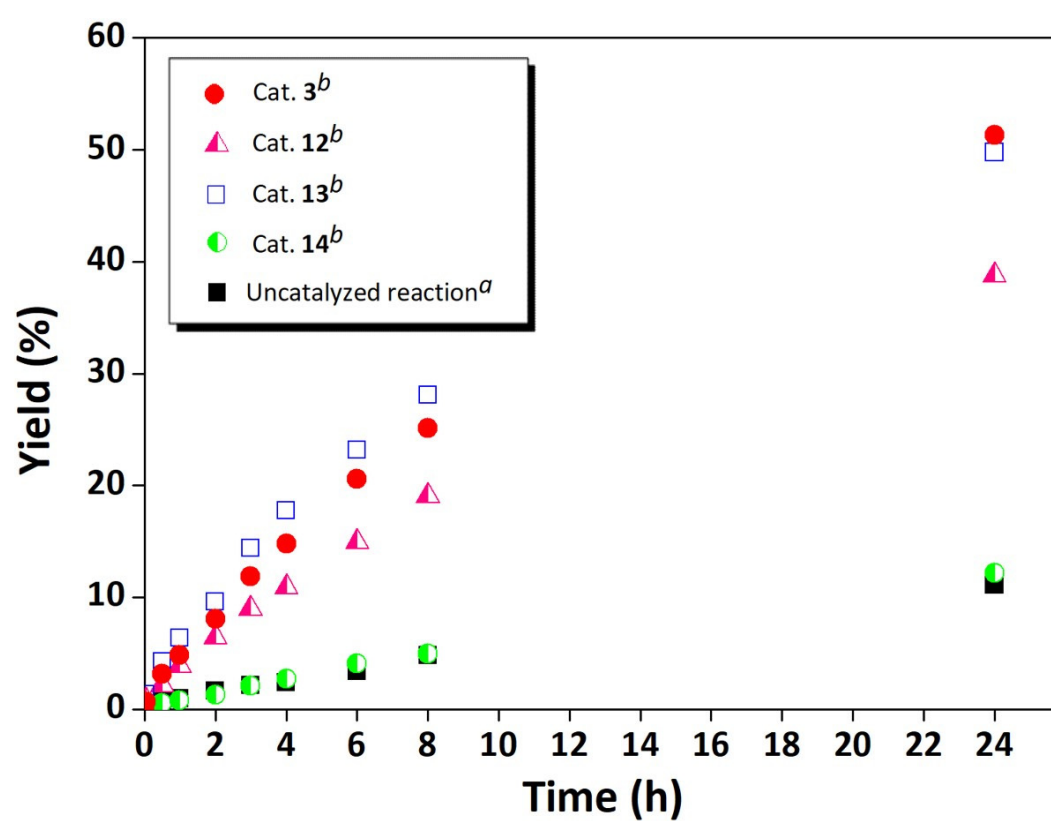

**Figure S5.** Kinetic curves obtained in the reduction of ketimine 1 in CDCl<sub>3</sub> using 10 mol% of aromatic prolinamides (12-14) with different aromatic substitutions. <sup>a</sup> [1] = 0.66 M, 1.5 equiv. HSiCl<sub>3</sub>, 0 °C; <sup>b</sup> [1] = 0.66 M, [catalyst] = 0.066 M, 1.5 equiv. HSiCl<sub>3</sub>, 0 °C.

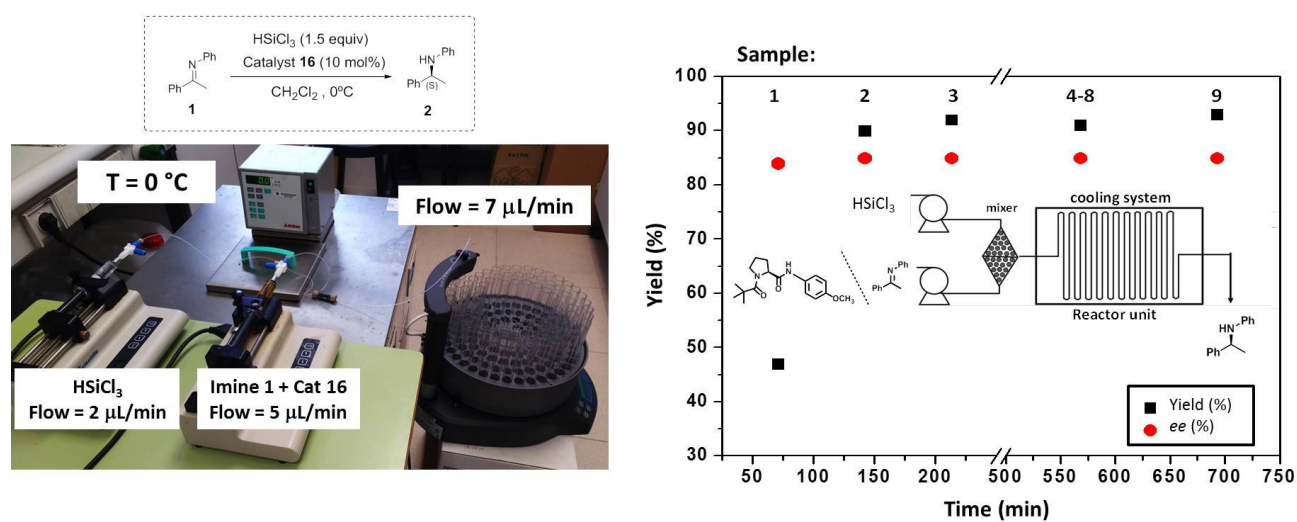

**Figure S6.** Set up of the system for the reduction of imine **1** under continuous flow and results of the analyzed samples during the flow process.



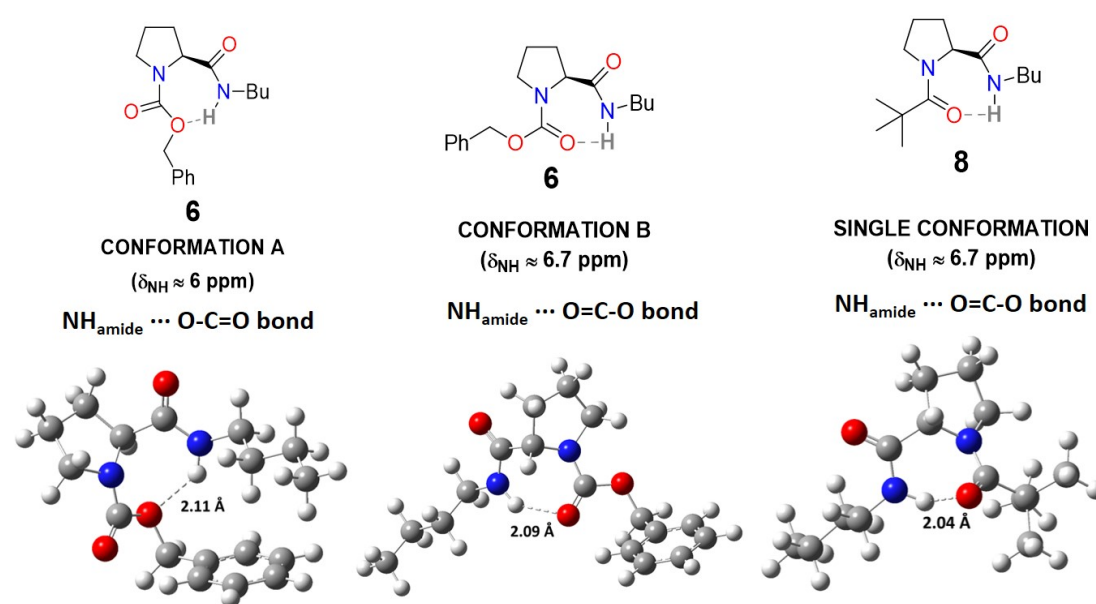

**Figure S7.** Possible conformations of catalysts 6 and 8.

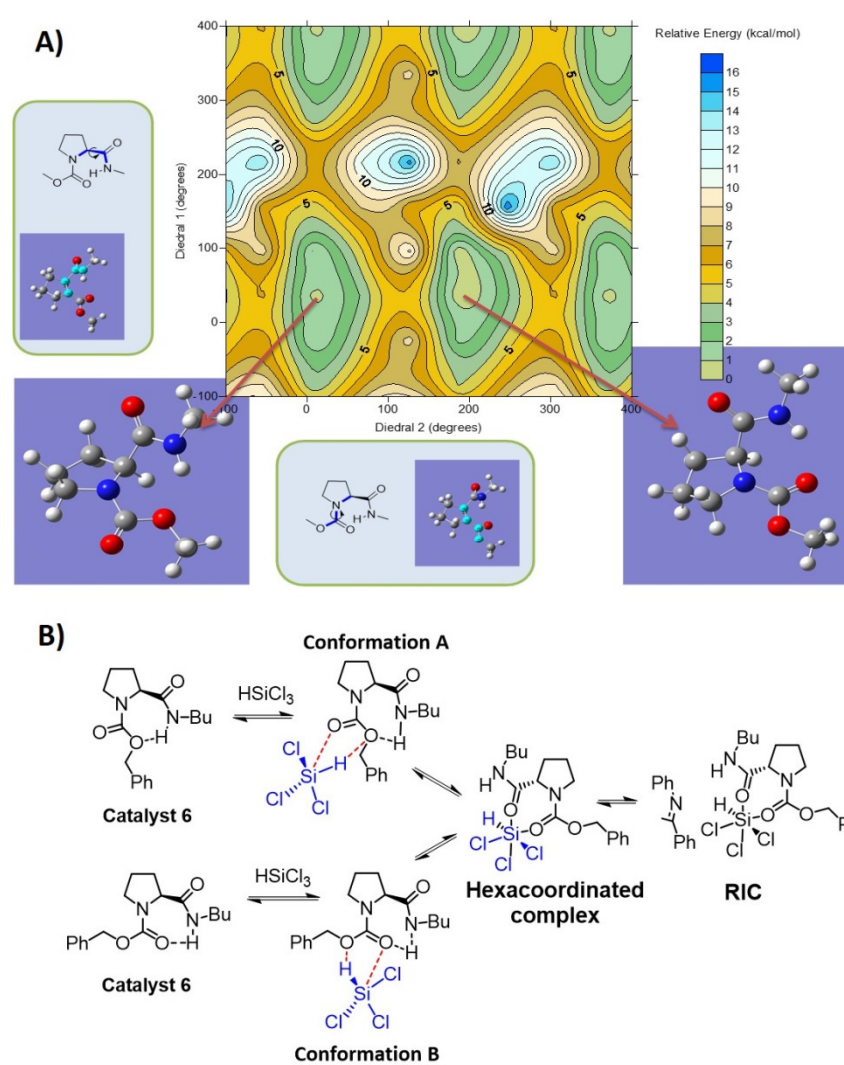

**Figure S8.** A) Conformational space for the simplified model of catalyst **6**. B) Evolution of catalyst **6** in the presence of  $\text{HSiCl}_3$  and ketimine to form the RIC.

**Table S7.** Energies calculated for the most relevant states corresponding to a series of catalysts studied in this work, including *down* and *up* conformations.

| Entry | Catalyst    | Conf.          | Energy of interaction complexes (Eh) |       |       |              |       |       | $\Delta E_{\text{ERIC-TS}}^a$<br>(kcal/mol) |       | $ee_{\text{calcd.}}^b$<br>(%) | $\overline{ee}_{\text{calcd.}}$<br>(%) |
|-------|-------------|----------------|--------------------------------------|-------|-------|--------------|-------|-------|---------------------------------------------|-------|-------------------------------|----------------------------------------|
|       |             |                | Enantiomer R                         |       |       | Enantiomer S |       |       |                                             |       |                               |                                        |
|       |             |                | RIC                                  | TS    | PIC   | RIC          | TS    | PIC   | (R)                                         | (S)   |                               |                                        |
| 1     | Uncatalyzed | -              | -                                    | -     | -     | -            | -     | -     | 29.38                                       | 29.38 | 0                             | 0                                      |
| 2     | 3           | down<br><br>up | -                                    | -     | -     | -            | -     | -     | 17.75                                       | 17.23 | 44                            | 32                                     |
|       |             |                | 0.241                                | 0.212 | 0.262 | 0.241        | 0.214 | 0.267 |                                             |       |                               |                                        |
|       |             |                | -                                    | -     | -     | -            | -     | -     | 17.80                                       | 17.58 | 20                            |                                        |
| 3     | 5           | down<br><br>up | -                                    | -     | -     | n.c          | n.c   | n.c   | 48.87                                       | n.c   | n.c                           | n.c                                    |
|       |             |                | 0.291                                | 0.213 | 0.298 | n.c          | n.c   | n.c   |                                             |       |                               |                                        |
|       |             |                | n.c                                  | n.c   | n.c   | n.c          | n.c   | n.c   | n.c                                         | n.c   | n.c                           |                                        |
| 4     | 6           | down<br><br>up | -                                    | -     | -     | -            | -     | -     | 22.68                                       | 22.19 | 42                            | 70                                     |
|       |             |                | 0.315                                | 0.279 | 0.330 | 0.315        | 0.279 | 0.336 |                                             |       |                               |                                        |
|       |             |                | -                                    | -     | -     | -            | -     | -     | 22.85                                       | 20.57 | 97                            |                                        |
| 5     | 12          | down<br><br>up | -                                    | -     | -     | -            | -     | -     | 18.54                                       | 18.17 | 33                            | 57                                     |
|       |             |                | 0.280                                | 0.250 | 0.300 | 0.281        | 0.252 | 0.300 |                                             |       |                               |                                        |
|       |             |                | -                                    | -     | n.c   | -            | -     | n.c   | 19.17                                       | 17.99 | 80                            |                                        |
| 6     | 13          | down<br><br>up | -                                    | -     | -     | -            | -     | -     | 19.04                                       | 17.80 | 82                            | 66                                     |
|       |             |                | 0.306                                | 0.275 | 0.325 | 0.305        | 0.277 | 0.330 |                                             |       |                               |                                        |
|       |             |                | -                                    | -     | -     | -            | -     | -     | 19.30                                       | 18.70 | 50                            |                                        |
| 7     | 14          | down<br><br>up | -                                    | -     | -     | -            | -     | -     | 13.67                                       | 11.97 | 92                            | 80                                     |
|       |             |                | 0.246                                | 0.224 | 0.269 | 0.245        | 0.226 | 0.278 |                                             |       |                               |                                        |
|       |             |                | -                                    | -     | -     | -            | -     | -     | 13.33                                       | 12.44 | 68                            |                                        |
|       |             |                | 0.245                                | 0.223 | 0.272 | 0.245        | 0.225 | 0.267 |                                             |       |                               |                                        |

|   |    |             |       |       |       |       |       |       |       |       |    |    |
|---|----|-------------|-------|-------|-------|-------|-------|-------|-------|-------|----|----|
| 8 | 16 | <i>down</i> | -     | -     | -     | -     | -     | -     | 19.34 | 18.10 | 81 | 46 |
|   |    | <i>up</i>   | 0.310 | 0.279 | 0.331 | 0.309 | 0.281 | 0.338 | 19.04 | 18.91 | 11 |    |

<sup>a</sup> Eh units were converted in kcal/mol units multiplying the  $\Delta E_{\text{RIC-TS}}$  by 627.509.

<sup>b</sup> Enantiomeric excess calculated using eq 4.

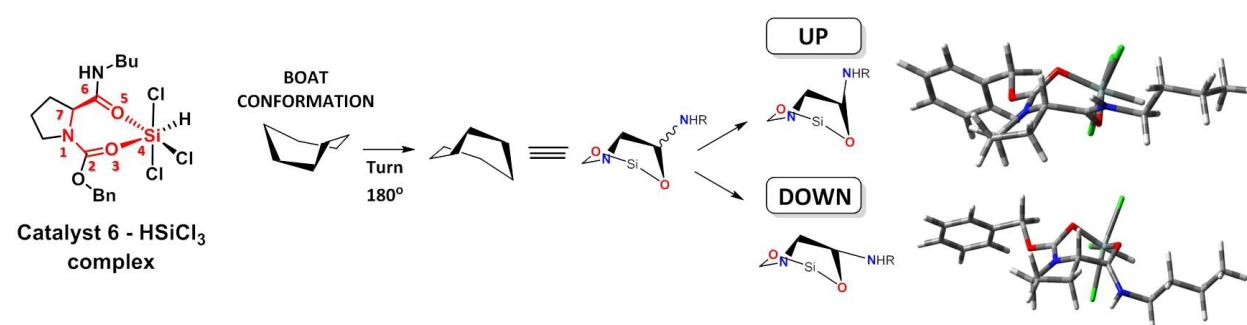

**Figure S9.** Representation of the two possible boat conformations (*up* and *down*) for the catalyst 6-HSiCl<sub>3</sub> complex.

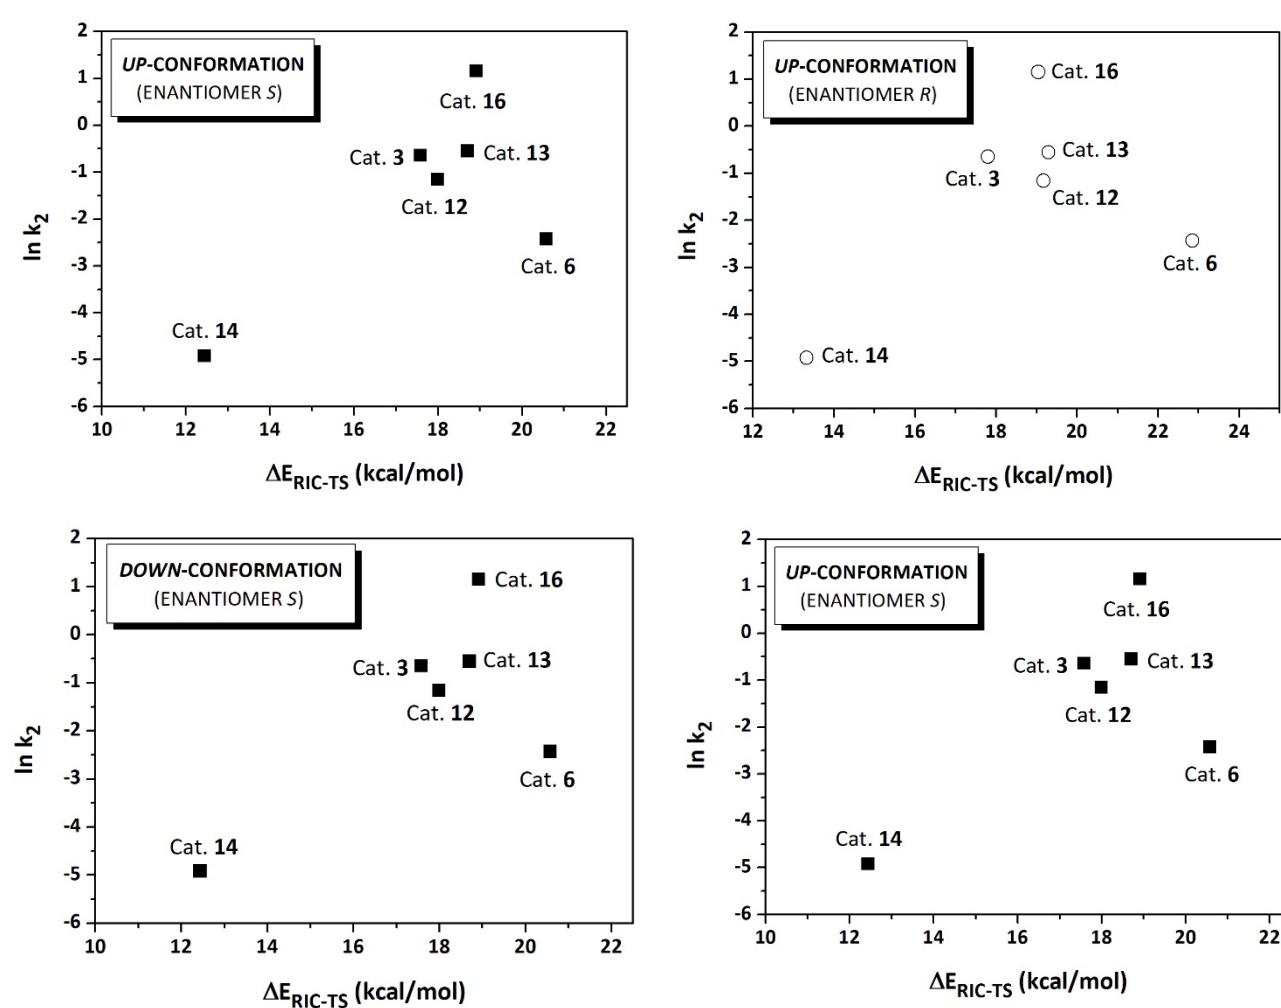

**Figure S10.**  $\ln k_2$  (experimental) vs.  $\Delta E_{\text{RIC-TS}}$  (theoretical) for the S and R enantiomers, both for the *up* and *down* conformations of the catalysts studied.

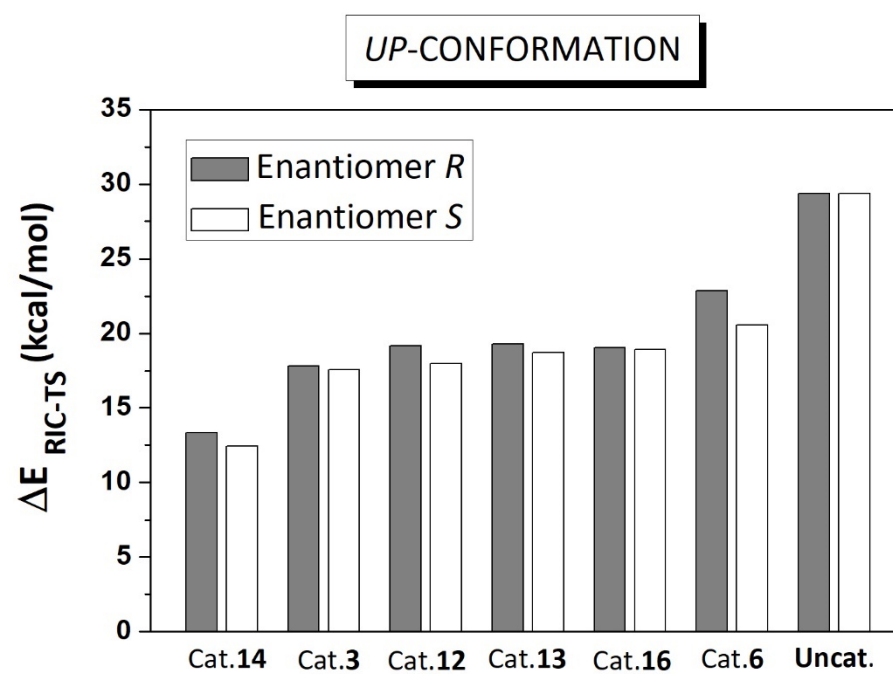

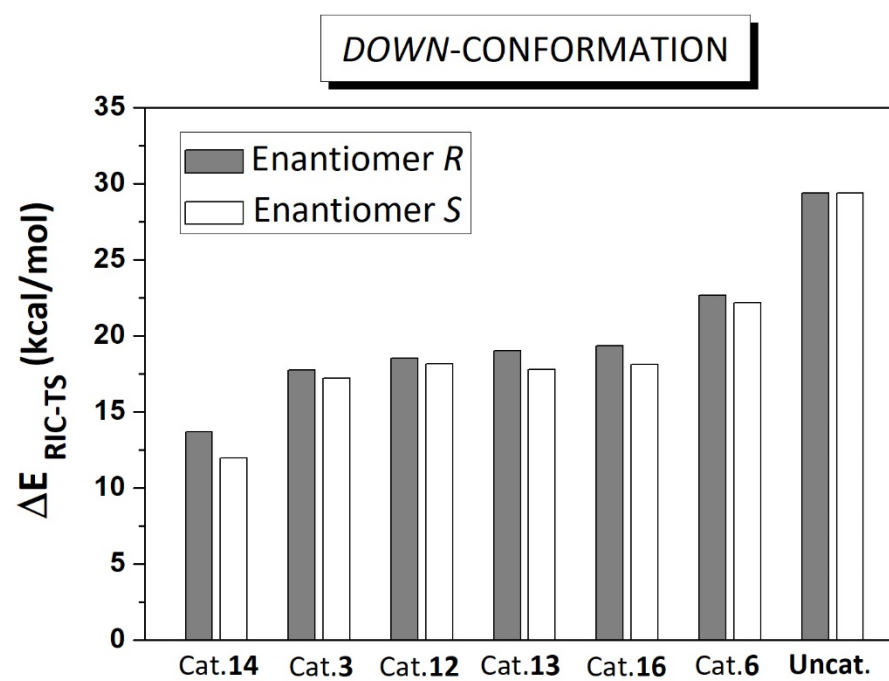

**Figure S11.** Energy difference between RIC and TS calculated for the different systems studied.

**Table S8.** Comparison of the enantioselectivity calculated by computational methods with the experimental values

| Entry | Cat.      | <i>ee</i> <sub>calcd.</sub> <sup>a</sup> (%)<br>( <i>down</i> ) | <i>ee</i> <sub>calcd.</sub> <sup>a</sup> (%)<br>( <i>up</i> ) | <i>ee</i> <sub>calcd.</sub> <sup>b</sup> (%) | <i>ee</i> <sub>exp.</sub> <sup>c</sup> (%) |
|-------|-----------|-----------------------------------------------------------------|---------------------------------------------------------------|----------------------------------------------|--------------------------------------------|
| 1     | <b>3</b>  | 44                                                              | 20                                                            | 32                                           | 76                                         |
| 2     | <b>6</b>  | 42                                                              | 97                                                            | 70                                           | 63                                         |
| 3     | <b>12</b> | 33                                                              | 80                                                            | 57                                           | 77                                         |
| 4     | <b>13</b> | 82                                                              | 50                                                            | 66                                           | 79                                         |
| 5     | <b>14</b> | 92                                                              | 68                                                            | 80                                           | 10                                         |
| 6     | <b>16</b> | 81                                                              | 11                                                            | 46                                           | 88                                         |

<sup>a</sup> Values obtained by eq 4 using ΔE<sub>RIC-TS</sub> (*R*) and ΔE<sub>RIC-TS</sub> (*S*).

<sup>b</sup> Mean value obtained from enantioselectivity values for *up* and *down* conformations.

<sup>c</sup> Experimental enantioselectivity from the kinetic studies using 10 mol% of catalyst ([cat] = 0.205 M).



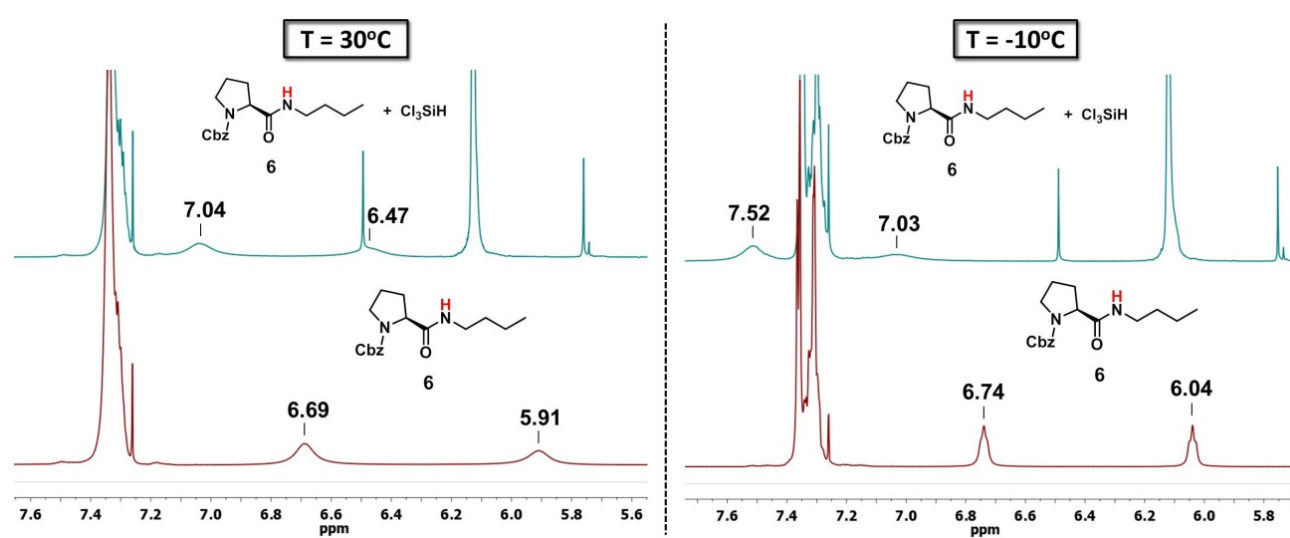

**Figure S12.** Comparison of <sup>1</sup>H-NMR spectra for catalyst 6 in the presence and absence of HSiCl<sub>3</sub> at different temperatures ([6] = 0.205 M, 1.5 eq HSiCl<sub>3</sub>, CDCl<sub>3</sub>, 500 MHz).

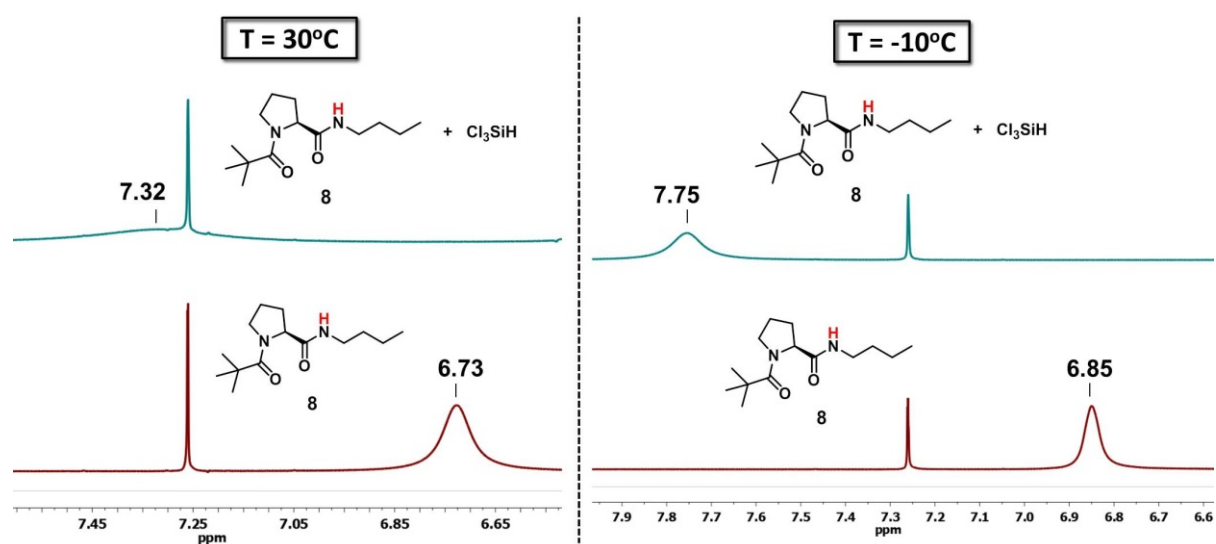

**Figure S13.** Comparison of <sup>1</sup>H-NMR spectra for catalyst **8** in the presence and absence of HSiCl<sub>3</sub> at different temperatures ([**8**] = 0.205 M, 1.5 eq HSiCl<sub>3</sub>, CDCl<sub>3</sub>, 500 MHz).

**Table S9.** Hydrogen bond distances and energies calculated for the optimized structures of the two most favorable conformations of the catalysts studied.

|       |      | Structure with<br>NH ... O=C-O bond                                                |              | Structure with<br>NH ... O-C=O bond                                                 |              |
|-------|------|------------------------------------------------------------------------------------|--------------|-------------------------------------------------------------------------------------|--------------|
|       |      | 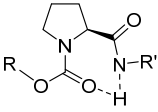 |              |  |              |
| Entry | Cat. | d <sub>bond</sub> (Å)                                                              | E (kcal/mol) | d <sub>bond</sub> (Å)                                                               | E (kcal/mol) |
| 1     | 3    | 2.03                                                                               | -87.38       | 2.14                                                                                | -87.74       |
| 2     | 6    | 2.09                                                                               | -131.93      | 2.11                                                                                | -132.85      |
| 3     | 12   | 2.03                                                                               | -111.69      | 2.14                                                                                | -111.47      |
| 4     | 13   | 2.03                                                                               | -126.75      | 2.13                                                                                | -127.25      |
| 5     | 14   | 1.98                                                                               | -95.07       | 2.09                                                                                | -95.50       |
| 6     | 16   | 1.93                                                                               | -128.86      | no bond                                                                             | --           |

**Table S10.** Calculated values for  $\Delta E_{TOT}$ ,  $\delta\Delta E_{TOT}$  and the expected enantiomeric excesses and comparison with the experimental enantioselectivity.

| Catalyst | Conf. | $\Delta E_{TOT}$ (kcal/mol) |      | $\delta\Delta E_{TOT}$<br>(kcal/mol ) | $ee_{calcd.}^a$<br>(%) | $\overline{ee}_{calcd.}^b$<br>(%) | $ee_{exp}^c$<br>(%) |
|----------|-------|-----------------------------|------|---------------------------------------|------------------------|-----------------------------------|---------------------|
|          |       | (R)                         | (S)  |                                       |                        |                                   |                     |
| 3        | down  | 5.95                        | 4.90 | -1.05                                 | 75                     | 81                                | 76                  |
|          | up    | 6.62                        | 5.20 | -1.42                                 | 86                     |                                   |                     |
| 6        | down  | 9.14                        | 8.80 | -0.34                                 | 31                     | 61                                | 78                  |
|          | up    | 9.35                        | 7.71 | -1.63                                 | 91                     |                                   |                     |
| 12       | down  | 6.22                        | 5.16 | -1.06                                 | 75                     | 81                                | 77                  |
|          | up    | 6.89                        | 5.44 | -1.46                                 | 87                     |                                   |                     |
| 13       | down  | 5.84                        | 4.82 | -1.02                                 | 74                     | 81                                | 79                  |
|          | up    | 6.66                        | 5.19 | -1.47                                 | 88                     |                                   |                     |
| 14       | down  | 6.05                        | 4.99 | -1.06                                 | 75                     | 77                                | 10                  |
|          | up    | 6.64                        | 5.48 | -1.16                                 | 79                     |                                   |                     |
| 16       | down  | 5.36                        | 4.40 | -- <sup>d</sup>                       | -- <sup>d</sup>        | 82                                | 88                  |
|          | up    | 4.57                        | 3.31 | -1.27                                 | 82                     |                                   |                     |

<sup>a</sup> Values obtained by applying eq 5 using  $\delta\Delta E_{TOT}$ .

<sup>b</sup> Mean obtained with enantioselectivity values for *up* and *down* conformations.

<sup>c</sup> Experimental enantioselectivity of kinetic study using a 10 mol% catalyst ([cat] = 0.205 M).

<sup>d</sup> *Down*-conformation was discarded because <sup>1</sup>H-NMR spectra of catalyst **16** showed only one conformation and this conformation was higher in energy than *up*-conformation.

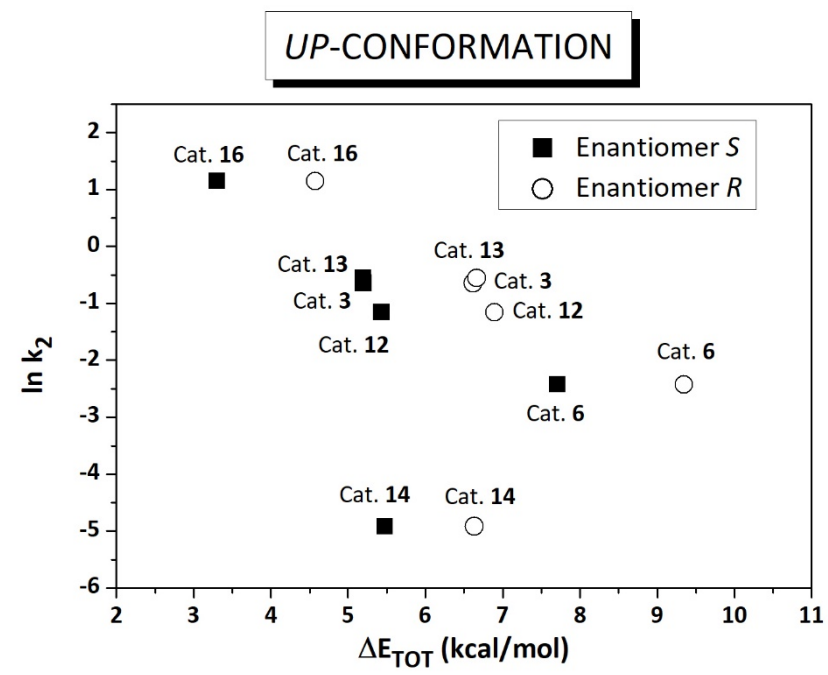

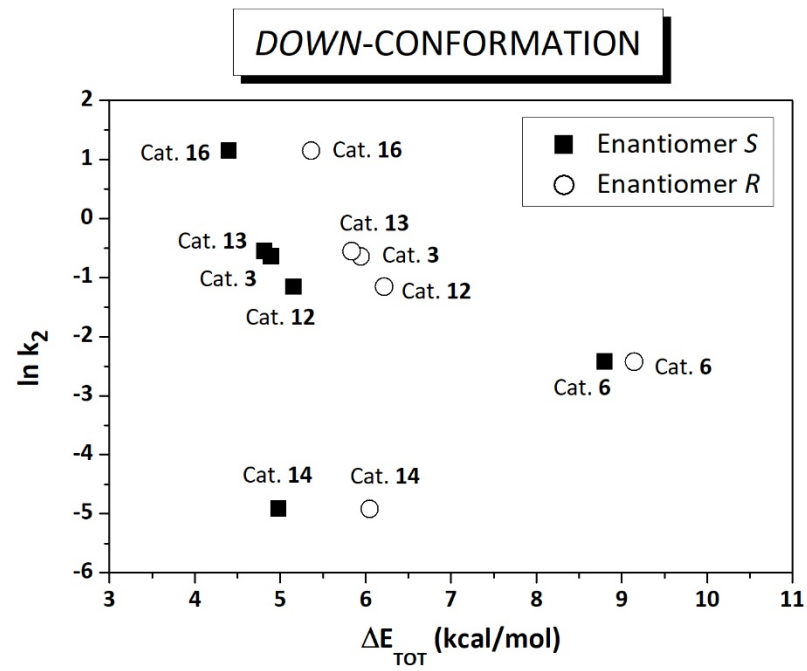

**Figure S14.** Representation of ln k<sub>2</sub> (experimental data) vs. ΔE<sub>TOT</sub> (calculated data) for the *up* and *down* conformations.

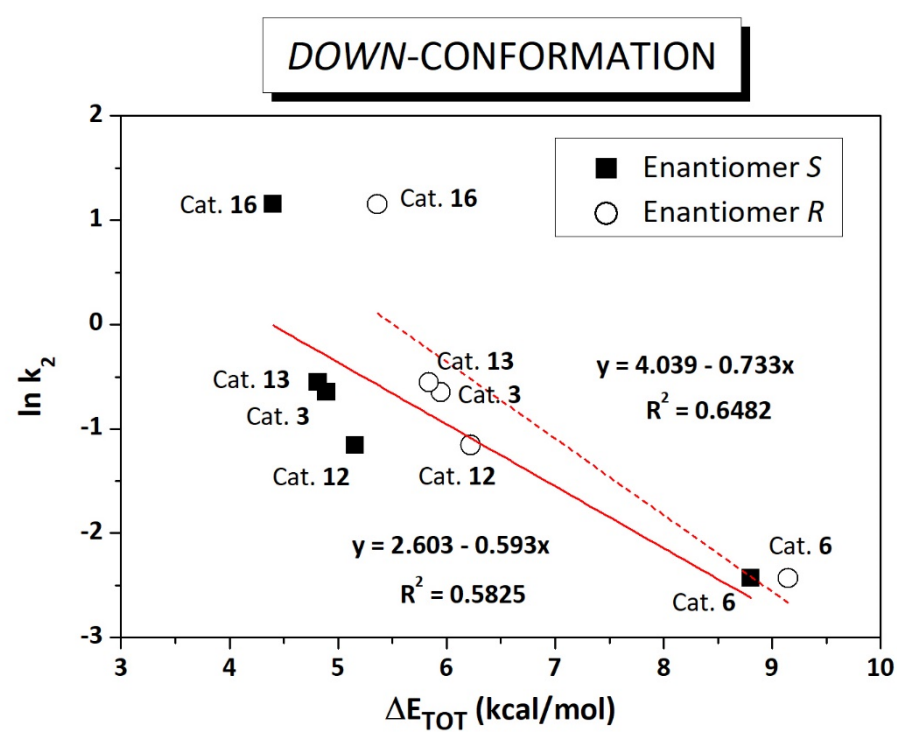

**Figure S15.** Representation of  $\ln k_2$  (experimental data) vs.  $\Delta E_{TOT}$  (theoretical data) for the *down* conformation.

1. Kinetic fitting data

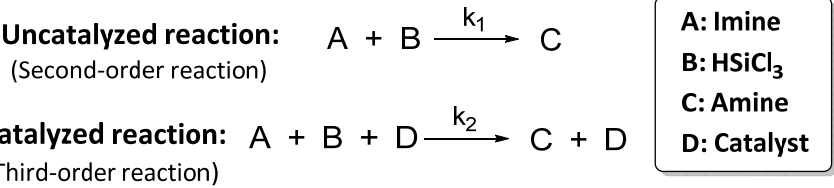

Equations used in the calculations of <sup>1</sup>H-NMR kinetic studies:

|                                                                                                                                                                                                                                                        |                                                                                                                                                             |
|--------------------------------------------------------------------------------------------------------------------------------------------------------------------------------------------------------------------------------------------------------|-------------------------------------------------------------------------------------------------------------------------------------------------------------|
| <p><i>Experimental concentrations:</i></p> $[C]_{\text{experimental}} = \frac{[A]_0 \cdot \text{Yield (\%)}}{100}$ $[A]_0 = [A] + [C] \rightarrow [A] = [A]_0 - [C]$ $[B]_0 = [B] + [C] \rightarrow [B] = [B]_0 - [C]$ $[D]_0 = [D] = \text{constant}$ | <p><i>Calculated concentration:</i></p> $[C]_{\text{calculated}} = \frac{[A]_0[B]_0(1 - e^{([B]_0 - [A]_0)kt})}{[A]_0 - [B]_0 \cdot e^{([B]_0 - [A]_0)kt}}$ |
|--------------------------------------------------------------------------------------------------------------------------------------------------------------------------------------------------------------------------------------------------------|-------------------------------------------------------------------------------------------------------------------------------------------------------------|

Yield (%) =  $\frac{\text{Integration CH}_3 \text{ amine}}{\text{Integration CH}_3 \text{ amine} + \text{Integration CH}_3 \text{ imine} + \text{Integration CH}_3 \text{ acetophenone}} \cdot 100$



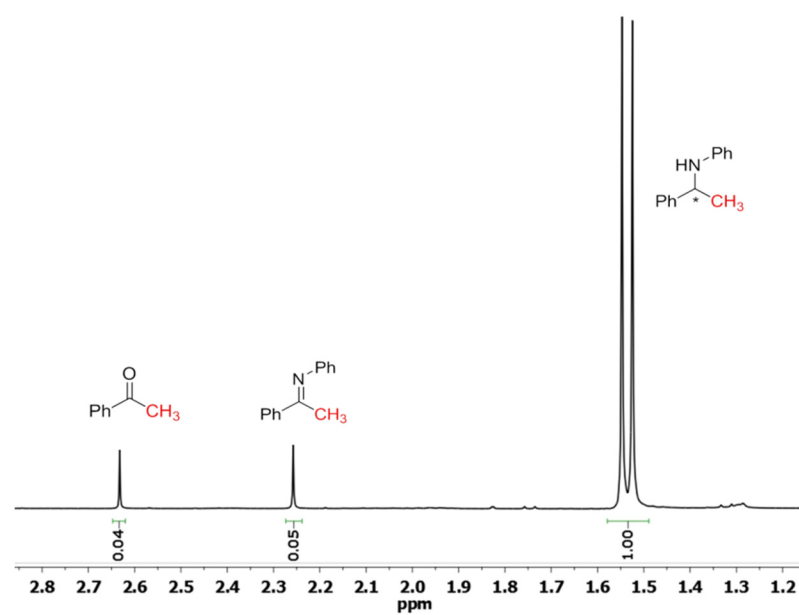**Uncatalyzed reaction:**

Experimental concentrations for each reaction time, based on  $^1\text{H}$ -NMR data:

| t (h) | Yield (%) | [A] (M) | [B] (M) | [C] (M) |
|-------|-----------|---------|---------|---------|
| 0     | 0.00      | 0.660   | 0.990   | 0.000   |
| 0.033 | 0.39      | 0.657   | 0.987   | 0.003   |
| 0.5   | 0.76      | 0.655   | 0.985   | 0.005   |
| 1     | 0.97      | 0.654   | 0.984   | 0.006   |
| 2     | 1.62      | 0.649   | 0.979   | 0.011   |
| 3     | 2.10      | 0.646   | 0.976   | 0.014   |
| 4     | 2.39      | 0.644   | 0.974   | 0.016   |
| 6     | 3.37      | 0.638   | 0.968   | 0.022   |
| 8     | 4.80      | 0.628   | 0.958   | 0.032   |
| 24    | 11.11     | 0.587   | 0.917   | 0.073   |

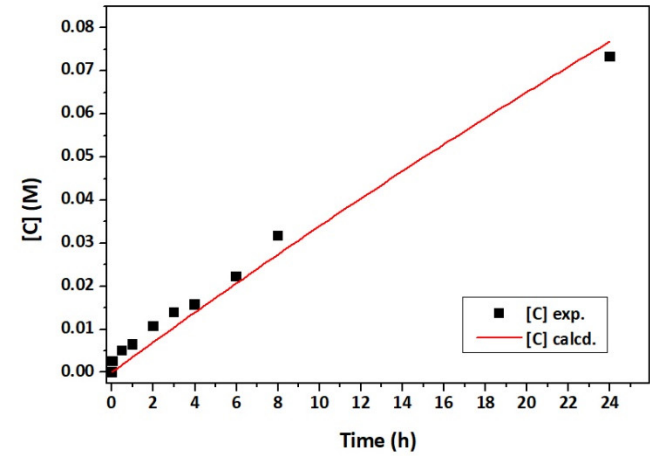

|              |                                                           |                |                   |
|--------------|-----------------------------------------------------------|----------------|-------------------|
| Equation     | $c=a0*b0*(1-\exp((b0-a0)*k*t))/(a0-b0*\exp((b0-a0)*k*t))$ |                |                   |
| Adj. R-Squar | 0.97962                                                   |                |                   |
|              |                                                           | Value          | Standard Error    |
| D            | a0                                                        | 0.66           | 0                 |
| D            | b0                                                        | 0.99           | 0                 |
| D            | k                                                         | <b>0.00543</b> | <b>2.11541E-4</b> |

$k_1 = 0.00543$

Catalyzed reaction by 3:

Experimental concentrations for each reaction time, based on <sup>1</sup>H-NMR data:

| t (h) | Yield (%) | [A] (M) | [B] (M) | [C] (M) | [D] (M) |
|-------|-----------|---------|---------|---------|---------|
| 0     | 0.00      | 0.660   | 0.990   | 0.000   | 0.066   |
| 0.033 | 0.63      | 0.656   | 0.986   | 0.004   | 0.066   |
| 0.5   | 3.16      | 0.639   | 0.969   | 0.021   | 0.066   |
| 1     | 4.80      | 0.628   | 0.958   | 0.032   | 0.066   |
| 2     | 8.05      | 0.607   | 0.937   | 0.053   | 0.066   |
| 3     | 11.84     | 0.582   | 0.912   | 0.078   | 0.066   |
| 4     | 14.78     | 0.562   | 0.892   | 0.098   | 0.066   |
| 6     | 20.55     | 0.524   | 0.854   | 0.136   | 0.066   |
| 8     | 25.13     | 0.494   | 0.824   | 0.166   | 0.066   |
| 24    | 51.28     | 0.322   | 0.652   | 0.338   | 0.066   |

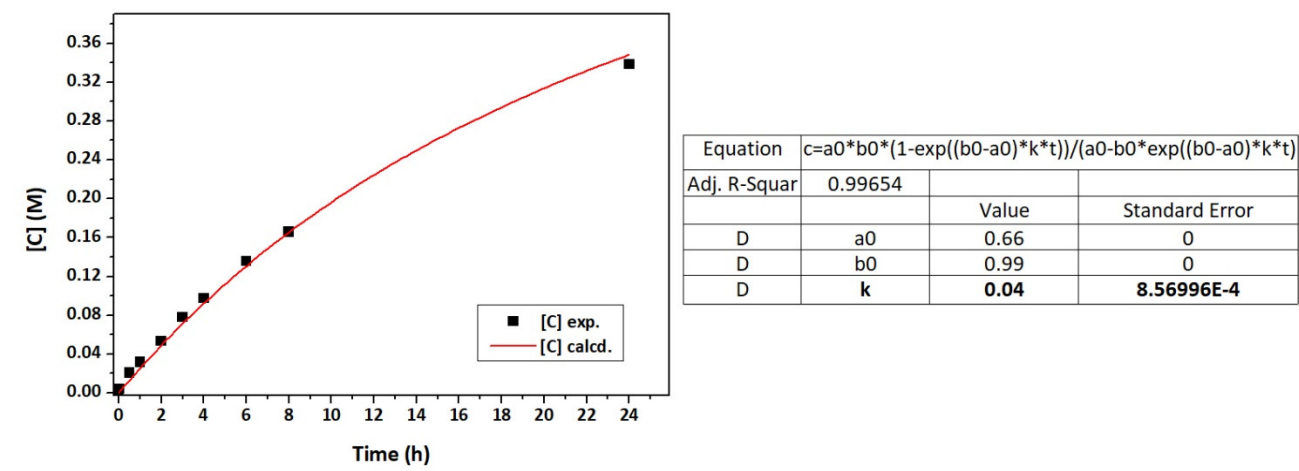

Calculation of k2:

$$k = 0.04$$
$$k_1 = 0.00543$$
$$[D] = [D]_0 = 0.066$$

}

$$k_2 = \frac{k - k_1}{[D]} = 0.5238$$

Catalyzed reaction by 6:

Experimental concentrations for each reaction time, based on <sup>1</sup>H-NMR data:

| t (h) | Yield (%) | [A] (M) | [B] (M) | [C] (M) | [D] (M) |
|-------|-----------|---------|---------|---------|---------|
| 0     | 0.00      | 0.660   | 0.990   | 0.000   | 0.066   |
| 0.033 | 0.79      | 0.655   | 0.985   | 0.005   | 0.066   |
| 0.5   | 1.73      | 0.649   | 0.979   | 0.011   | 0.066   |
| 1     | 2.60      | 0.643   | 0.973   | 0.017   | 0.066   |
| 2     | 3.76      | 0.635   | 0.965   | 0.025   | 0.066   |
| 3     | 4.79      | 0.628   | 0.958   | 0.032   | 0.066   |
| 4     | 5.62      | 0.623   | 0.953   | 0.037   | 0.066   |
| 6     | 7.39      | 0.611   | 0.941   | 0.049   | 0.066   |
| 8     | 8.95      | 0.601   | 0.931   | 0.059   | 0.066   |
| 24    | 20.29     | 0.526   | 0.856   | 0.134   | 0.066   |

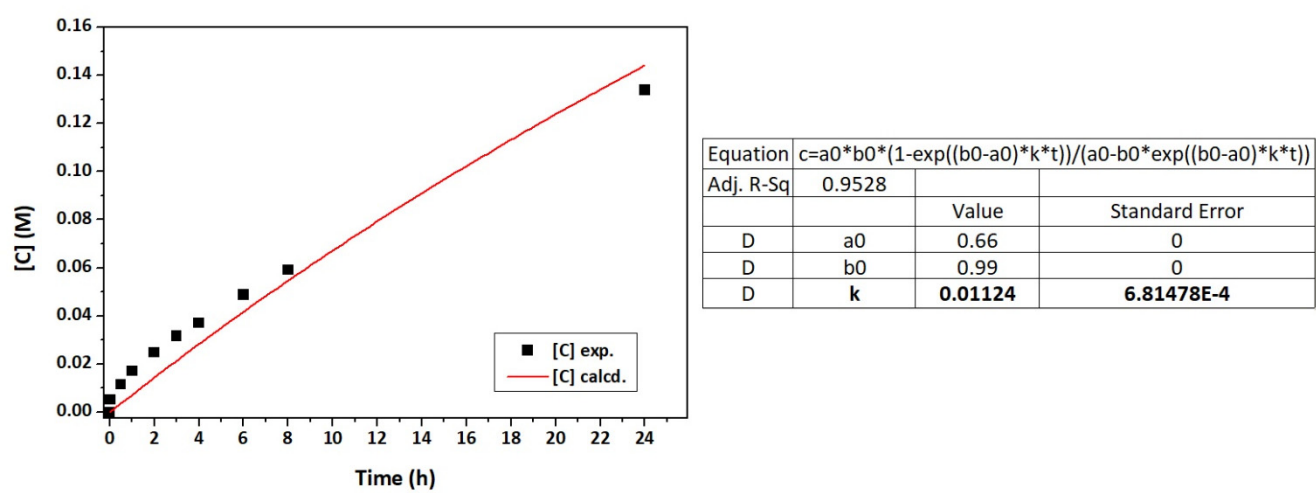

Calculation of k2:

$$k = 0.01124$$
$$k_1 = 0.00543$$
$$[D] = [D]_0 = 0.066$$

}

$$k_2 = \frac{k - k_1}{[D]} = 0.0880$$

Catalyzed reaction by 8:

Experimental concentrations for each reaction time, based on <sup>1</sup>H-NMR data:

| t (h) | Yield (%) | [A] (M) | [B] (M) | [C] (M) | [D] (M) |
|-------|-----------|---------|---------|---------|---------|
| 0     | 0.00      | 0.660   | 0.990   | 0.000   | 0.066   |
| 0.033 | 1.28      | 0.652   | 0.982   | 0.008   | 0.066   |
| 0.5   | 2.89      | 0.641   | 0.971   | 0.019   | 0.066   |
| 1     | 5.71      | 0.622   | 0.952   | 0.038   | 0.066   |
| 2     | 8.28      | 0.605   | 0.935   | 0.055   | 0.066   |
| 3     | 11.35     | 0.585   | 0.915   | 0.075   | 0.066   |
| 4     | 13.89     | 0.568   | 0.898   | 0.092   | 0.066   |
| 6     | 18.58     | 0.537   | 0.867   | 0.123   | 0.066   |
| 8     | 23.92     | 0.502   | 0.832   | 0.158   | 0.066   |
| 24    | 48.05     | 0.343   | 0.673   | 0.317   | 0.066   |

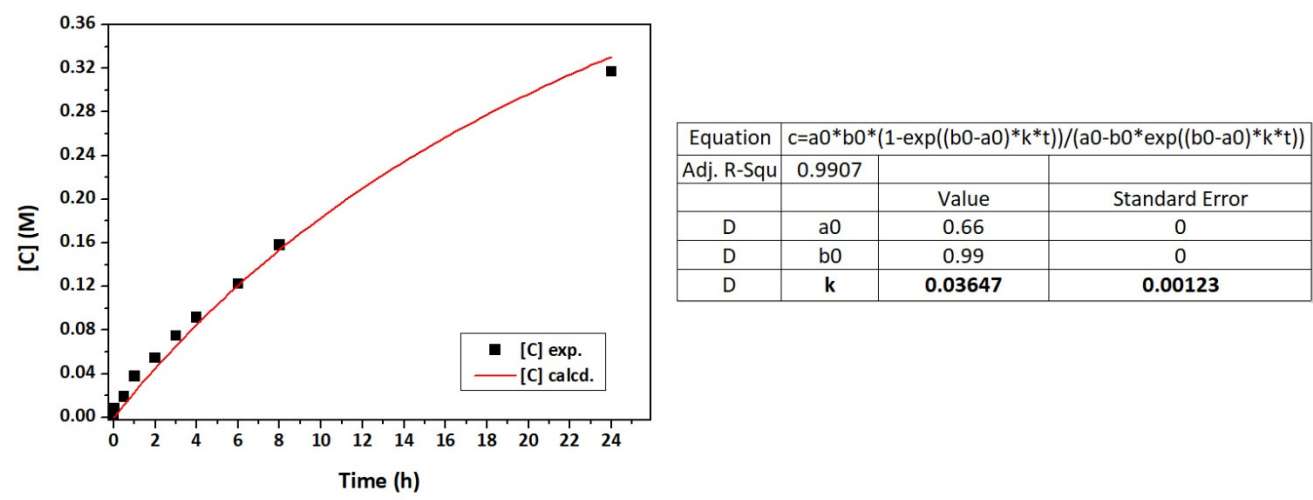

Calculation of k2:

$$k = 0.03647$$
$$k_1 = 0.00543$$
$$[D] = [D]_0 = 0.066$$

}

$$k_2 = \frac{k - k_1}{[D]} = 0.4703$$



Catalyzed reaction by 12:

Experimental concentrations for each reaction time, based on <sup>1</sup>H-NMR data:

| t (h) | Yield (%) | [A] (M) | [B] (M) | [C] (M) | [D] (M) |
|-------|-----------|---------|---------|---------|---------|
| 0     | 0.00      | 0.660   | 0.990   | 0.000   | 0.066   |
| 0.033 | 0.74      | 0.655   | 0.985   | 0.005   | 0.066   |
| 0.5   | 2.16      | 0.646   | 0.976   | 0.014   | 0.066   |
| 1     | 3.87      | 0.634   | 0.964   | 0.026   | 0.066   |
| 2     | 6.44      | 0.617   | 0.947   | 0.043   | 0.066   |
| 3     | 9.00      | 0.601   | 0.931   | 0.059   | 0.066   |
| 4     | 10.93     | 0.588   | 0.918   | 0.072   | 0.066   |
| 6     | 14.98     | 0.561   | 0.891   | 0.099   | 0.066   |
| 8     | 19.04     | 0.534   | 0.864   | 0.126   | 0.066   |
| 24    | 38.78     | 0.404   | 0.734   | 0.256   | 0.066   |

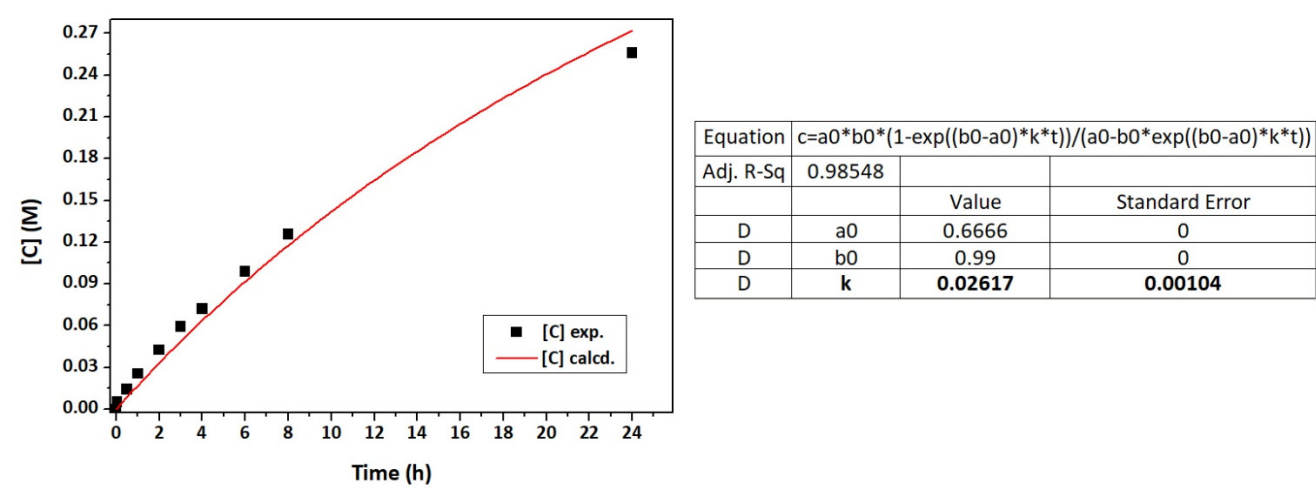

Calculation of k<sub>2</sub>:

$$\left. \begin{aligned} k &= 0.02617 \\ k_1 &= 0.00543 \\ [D] &= [D]_0 = 0.066 \end{aligned} \right\}$$

$$k_2 = \frac{k - k_1}{[D]} = 0.3142$$

Catalyzed reaction by 13:

Experimental concentrations for each reaction time, based on <sup>1</sup>H-NMR data:

| t (h) | Yield (%) | [A] (M) | [B] (M) | [C] (M) | [D] (M) |
|-------|-----------|---------|---------|---------|---------|
| 0     | 0.00      | 0.660   | 0.990   | 0.000   | 0.066   |
| 0.033 | 1.33      | 0.651   | 0.981   | 0.009   | 0.066   |
| 0.5   | 4.24      | 0.632   | 0.962   | 0.028   | 0.066   |
| 1     | 6.37      | 0.618   | 0.948   | 0.042   | 0.066   |
| 2     | 9.58      | 0.597   | 0.927   | 0.063   | 0.066   |
| 3     | 14.35     | 0.565   | 0.895   | 0.095   | 0.066   |
| 4     | 17.73     | 0.543   | 0.873   | 0.117   | 0.066   |
| 6     | 23.17     | 0.507   | 0.837   | 0.153   | 0.066   |
| 8     | 28.09     | 0.475   | 0.805   | 0.185   | 0.066   |
| 24    | 49.75     | 0.332   | 0.662   | 0.328   | 0.066   |

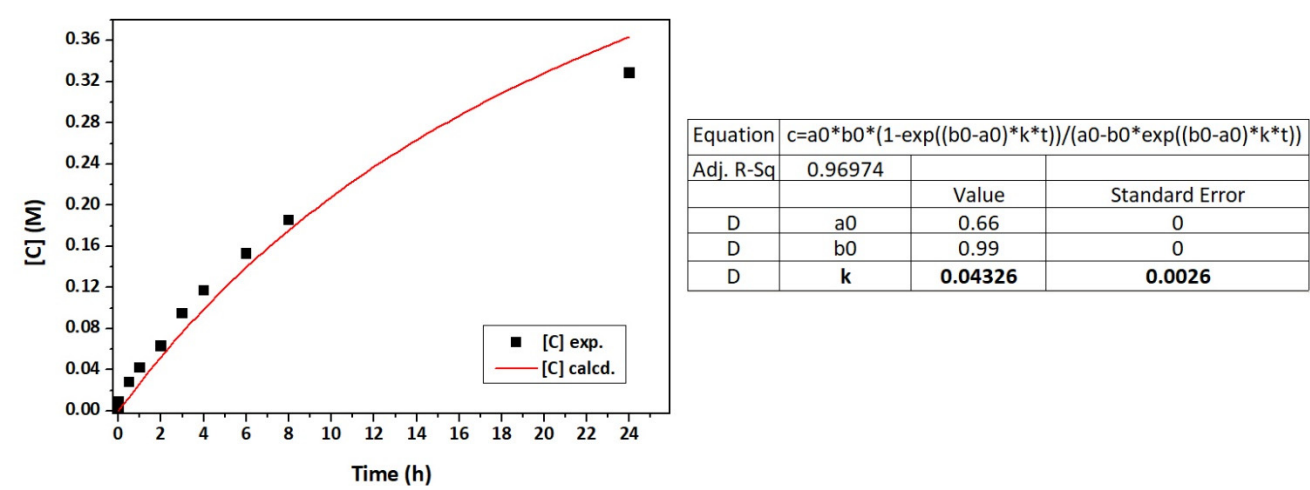

Calculation of k<sub>2</sub>:

$$k = 0.04326$$
$$k_1 = 0.00543$$
$$[D] = [D]_0 = 0.066$$

}

$$k_2 = \frac{k - k_1}{[D]} = 0.5732$$

Catalyzed reaction by 14:

Experimental concentrations for each reaction time, based on <sup>1</sup>H-NMR data:

| t (h) | Yield (%) | [A] (M) | [B] (M) | [C] (M) | [D] (M) |
|-------|-----------|---------|---------|---------|---------|
| 0     | 0.00      | 0.660   | 0.990   | 0.000   | 0.066   |
| 0.033 | 0.22      | 0.659   | 0.989   | 0.001   | 0.066   |
| 0.5   | 0.50      | 0.657   | 0.987   | 0.003   | 0.066   |
| 1     | 0.78      | 0.655   | 0.985   | 0.005   | 0.066   |
| 2     | 1.27      | 0.652   | 0.982   | 0.008   | 0.066   |
| 3     | 2.10      | 0.646   | 0.976   | 0.014   | 0.066   |
| 4     | 2.70      | 0.642   | 0.972   | 0.018   | 0.066   |
| 6     | 4.07      | 0.633   | 0.963   | 0.027   | 0.066   |
| 8     | 4.94      | 0.627   | 0.957   | 0.033   | 0.066   |
| 24    | 12.20     | 0.580   | 0.910   | 0.080   | 0.066   |

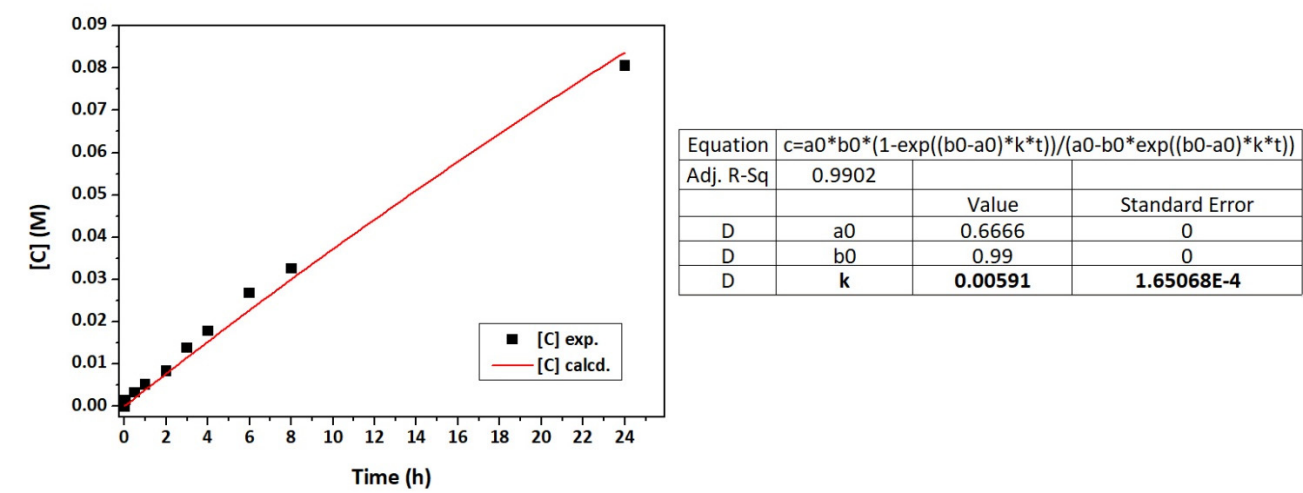

Calculation of k<sub>2</sub>:

$$k = 0.00591$$
$$k_1 = 0.00543$$
$$[D] = [D]_0 = 0.066$$

}

$$k_2 = \frac{k - k_1}{[D]} = 0.0073$$

Catalyzed reaction by 16:

Experimental concentrations for each reaction time, based on <sup>1</sup>H-NMR data:

| t (h) | Rto (%) | [A] (M) | [B] (M) | [C] (M) | [D] (M) |
|-------|---------|---------|---------|---------|---------|
| 0     | 0.00    | 0.660   | 0.990   | 0.000   | 0.066   |
| 0.033 | 2.88    | 0.641   | 0.971   | 0.019   | 0.066   |
| 0.5   | 14.72   | 0.563   | 0.893   | 0.097   | 0.066   |
| 1     | 21.53   | 0.518   | 0.848   | 0.142   | 0.066   |
| 2     | 33.44   | 0.439   | 0.769   | 0.221   | 0.066   |
| 3     | 42.37   | 0.380   | 0.710   | 0.280   | 0.066   |
| 4     | 49.50   | 0.333   | 0.663   | 0.327   | 0.066   |
| 6     | 60.24   | 0.262   | 0.592   | 0.398   | 0.066   |
| 8     | 66.67   | 0.220   | 0.550   | 0.440   | 0.066   |
| 24    | 87.95   | 0.080   | 0.410   | 0.580   | 0.066   |

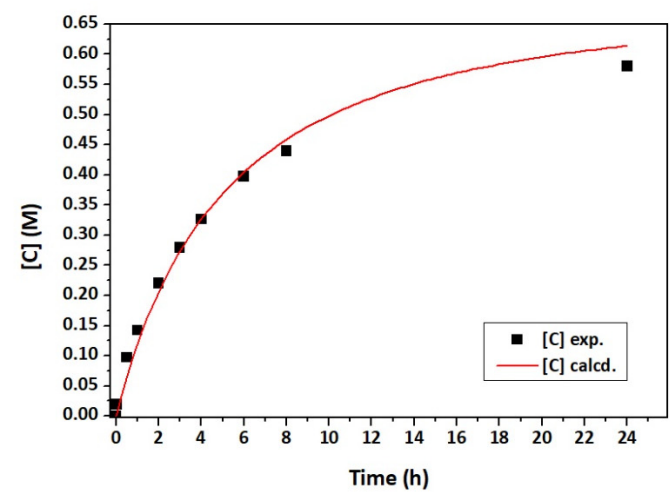

|           |                                                       |         |                |
|-----------|-------------------------------------------------------|---------|----------------|
| Equation  | c=a0*b0*(1-exp((b0-a0)*k*t))/(a0-b0*exp((b0-a0)*k*t)) |         |                |
| Adj. R-Sq | 0.98897                                               |         |                |
|           |                                                       | Value   | Standard Error |
| D         | a0                                                    | 0.66    | 0              |
| D         | b0                                                    | 0.99    | 0              |
| D         | k                                                     | 0.21395 | 0.01002        |

Calculation of k<sub>2</sub>:

k = 0.21395

k<sub>1</sub> = 0.00543

[D] = [D]<sub>0</sub> = 0.066

}

k<sub>2</sub> =  $\frac{k - k_1}{[D]}$  = 3.1594





Reactants interaction complex  
(RIC):

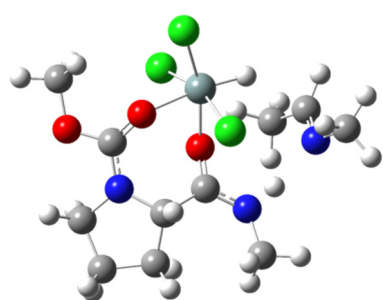

Transition state  
(TS):

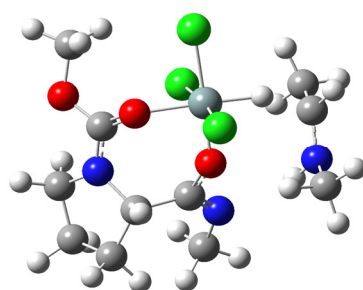

Products interaction complex  
(PIC):

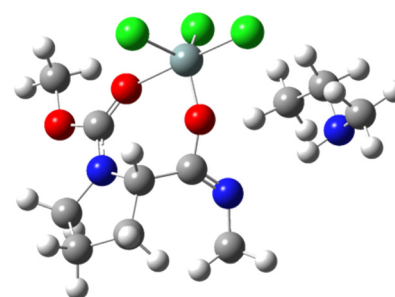

- Enantioselective reduction of the imine **1** using the organocatalyst **16**, obtaining the *R*-amine **2** as product.

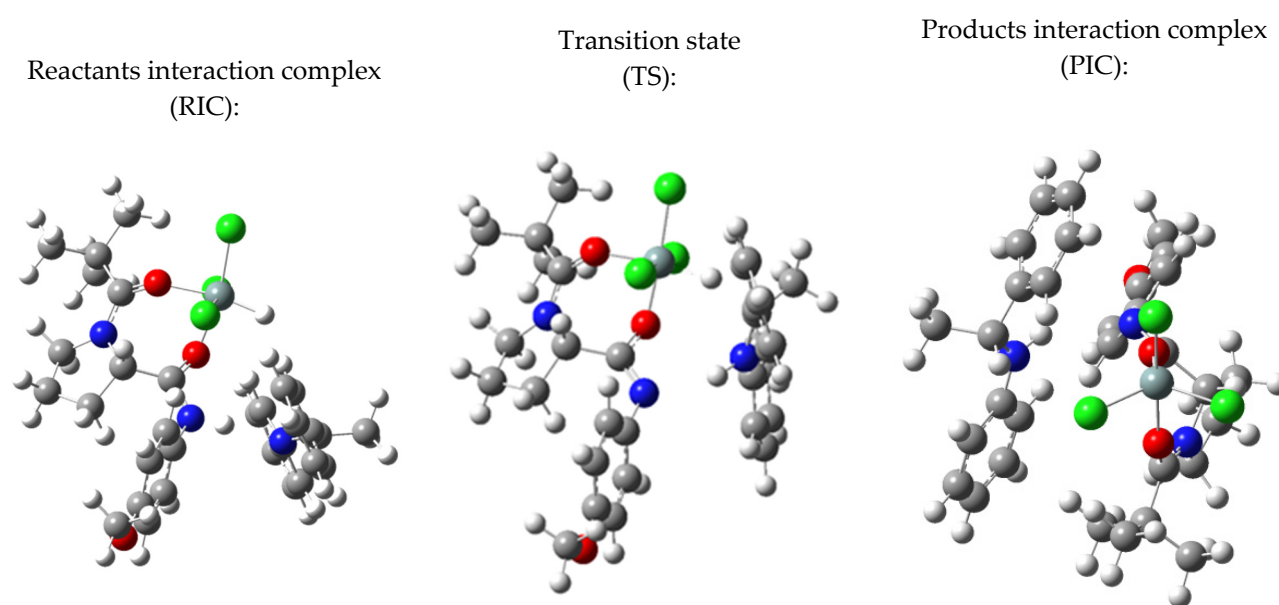

- Enantioselective reduction of the imine **1** using the organocatalyst **16**, obtaining the *S*-amine **2** as product.

Reactants interaction complex  
(RIC):

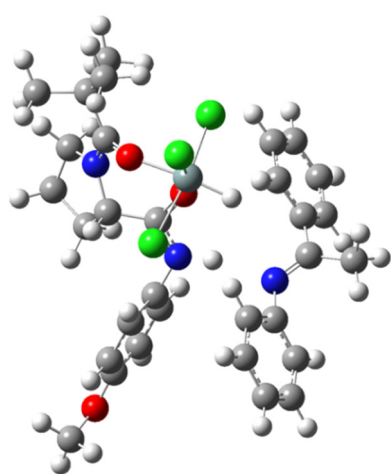

Transition state  
(TS):

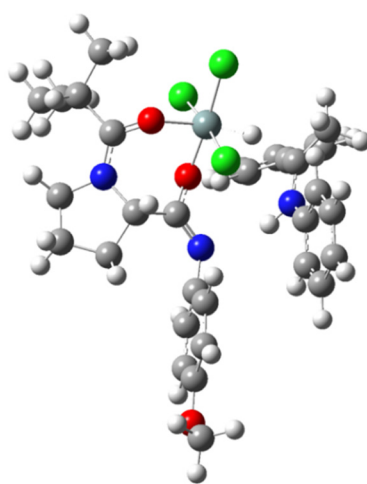

Products interaction complex  
(PIC):

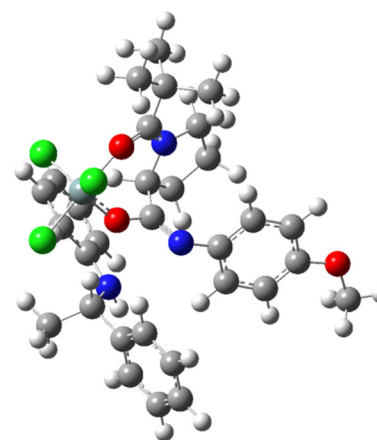

Cartesian coordinates calculations

The Cartesian coordinates of the most representative calculations in this work are shown below.

- Enantioselective reduction of the simplified imine using the simplified organocatalyst, obtaining the *R*-amine as product.

Reactants interaction complex (RIC):

|    |          |          |          |
|----|----------|----------|----------|
| 43 |          |          |          |
| Si | 0.69200  | 1.28600  | -0.18300 |
| N  | -2.18700 | -0.96800 | -0.79500 |
| C  | -1.67200 | -1.51800 | 0.49200  |
| C  | -0.13900 | -1.41100 | 0.60300  |
| O  | 0.48800  | -0.62900 | -0.17600 |
| C  | -3.04200 | -1.93800 | -1.54500 |
| C  | -2.21200 | -2.96500 | 0.52400  |
| H  | -1.41300 | -3.69500 | 0.29000  |
| C  | -3.32500 | -3.05800 | -0.53600 |
| H  | -2.60100 | -3.21900 | 1.52600  |
| H  | -4.32100 | -2.92900 | -0.07200 |
| H  | -3.33500 | -4.04900 | -1.02300 |
| H  | -2.49600 | -2.30400 | -2.44300 |
| H  | -3.96500 | -1.42800 | -1.89700 |
| H  | -2.08900 | -0.89000 | 1.33800  |
| C  | -1.87200 | 0.27200  | -1.29500 |
| O  | -1.15300 | 1.13000  | -0.75400 |
| Cl | -0.21200 | 1.10500  | 1.86200  |
| N  | 0.61800  | -2.13500 | 1.45800  |
| Cl | 1.19500  | 0.90100  | -2.25700 |
| N  | 3.36400  | -1.19000 | 1.28600  |
| C  | 3.69800  | -0.15200 | 1.98300  |
| Cl | 0.41000  | 3.34100  | -0.35500 |

|   |          |          |          |
|---|----------|----------|----------|
| H | 2.05300  | 1.19700  | 0.32400  |
| H | 1.67300  | -1.92100 | 1.48400  |
| C | 3.07900  | 0.06300  | 3.32600  |
| H | 3.77800  | 0.52800  | 4.03200  |
| H | 2.21000  | 0.74700  | 3.22400  |
| H | 2.69800  | -0.85800 | 3.78300  |
| C | 3.87900  | -1.35900 | -0.07900 |
| H | 4.76600  | -0.76100 | -0.33700 |
| H | 4.11800  | -2.42300 | -0.23900 |
| H | 3.07500  | -1.08000 | -0.79900 |
| C | 0.11600  | -3.04800 | 2.49700  |
| H | -0.09100 | -4.05300 | 2.08900  |
| H | 0.89100  | -3.16400 | 3.28100  |
| H | -0.78900 | -2.66200 | 2.99700  |
| C | -2.16900 | 1.83700  | -3.07300 |
| H | -2.22100 | 2.64900  | -2.33600 |
| H | -1.14700 | 1.74300  | -3.46700 |
| H | -2.92400 | 1.92400  | -3.85800 |
| O | -2.54600 | 0.56000  | -2.44700 |
| H | 4.40300  | 0.63500  | 1.67000  |

Transition state (TS):

|    |          |          |          |
|----|----------|----------|----------|
| 43 |          |          |          |
| Si | 0.57900  | 1.16000  | -0.01400 |
| N  | -2.05900 | -1.08300 | -0.89600 |
| C  | -1.61300 | -1.66700 | 0.40900  |
| C  | -0.08700 | -1.57400 | 0.66200  |
| O  | 0.51700  | -0.64400 | -0.05200 |
| C  | -2.83800 | -2.04900 | -1.73200 |
| C  | -2.13800 | -3.11800 | 0.35600  |

|    |          |          |          |
|----|----------|----------|----------|
| H  | -1.31400 | -3.82700 | 0.14000  |
| C  | -3.18800 | -3.18800 | -0.76800 |
| H  | -2.57200 | -3.41600 | 1.32600  |
| H  | -4.20800 | -3.06300 | -0.36000 |
| H  | -3.17100 | -4.16900 | -1.27400 |
| H  | -2.21100 | -2.39500 | -2.58400 |
| H  | -3.73500 | -1.54700 | -2.15500 |
| H  | -2.10300 | -1.07600 | 1.23700  |
| C  | -1.78000 | 0.17500  | -1.33300 |
| O  | -1.16300 | 1.08800  | -0.72300 |
| Cl | -0.32900 | 1.06600  | 1.97300  |
| N  | 0.66500  | -2.26200 | 1.47200  |
| Cl | 1.33800  | 0.98800  | -2.04000 |
| N  | 3.03400  | -0.42500 | 2.15200  |
| C  | 3.31100  | 0.27400  | 1.00500  |
| Cl | 0.47100  | 3.24000  | -0.08300 |
| H  | 2.02000  | 1.08000  | 0.58300  |
| H  | 2.48700  | -1.30800 | 2.06500  |
| C  | -2.04200 | 1.79000  | -3.07800 |
| H  | -2.29000 | 2.57100  | -2.34900 |
| H  | -0.97000 | 1.81500  | -3.31900 |
| H  | -2.67700 | 1.82000  | -3.96800 |
| H  | 3.82200  | 1.25000  | 1.10300  |
| C  | 3.60100  | -0.53000 | -0.22000 |
| H  | 3.79400  | 0.10500  | -1.10200 |
| H  | 4.46800  | -1.19100 | -0.08200 |
| H  | 2.74000  | -1.17300 | -0.51500 |
| C  | 2.83700  | 0.30500  | 3.42100  |
| H  | 1.87900  | 0.87100  | 3.43200  |
| H  | 2.80800  | -0.41300 | 4.25800  |
| H  | 3.65600  | 1.01800  | 3.61200  |
| C  | 0.17100  | -3.35200 | 2.31800  |

|   |          |          |          |
|---|----------|----------|----------|
| H | 0.08300  | -4.30000 | 1.76200  |
| H | 0.93200  | -3.50900 | 3.10700  |
| H | -0.78400 | -3.14100 | 2.82500  |
| O | -2.37700 | 0.47000  | -2.52900 |

Products interaction complex (PIC):

|    |          |          |          |
|----|----------|----------|----------|
| 43 |          |          |          |
| Si | 0.04300  | 1.49200  | 0.49100  |
| N  | -2.21900 | -1.19500 | -0.79100 |
| C  | -2.08300 | -1.29200 | 0.69600  |
| C  | -0.58300 | -1.30800 | 1.04700  |
| O  | -0.16400 | -0.02200 | 1.09900  |
| C  | -3.13500 | -2.22900 | -1.35800 |
| C  | -2.90400 | -2.53300 | 1.08400  |
| H  | -2.25300 | -3.39200 | 1.35500  |
| C  | -3.78300 | -2.88900 | -0.13100 |
| H  | -3.52100 | -2.32800 | 1.97900  |
| H  | -4.81400 | -2.51600 | 0.01500  |
| H  | -3.86400 | -3.98200 | -0.25900 |
| H  | -2.54400 | -2.95200 | -1.96300 |
| H  | -3.87800 | -1.75400 | -2.03400 |
| H  | -2.53500 | -0.36900 | 1.16800  |
| C  | -1.63800 | -0.20100 | -1.53000 |
| O  | -0.86000 | 0.68900  | -1.14600 |
| Cl | 0.98100  | 2.26300  | 2.11300  |
| N  | 0.33200  | -2.17300 | 1.28000  |
| Cl | 1.49300  | 1.81500  | -0.89400 |
| N  | 3.68700  | -1.27500 | 1.06000  |
| C  | 3.98700  | 0.07100  | 1.64900  |
| Cl | -1.65600 | 2.61900  | 0.53600  |



|   |          |          |          |
|---|----------|----------|----------|
| H | 3.48700  | 0.90500  | 1.10400  |
| H | 2.73500  | -1.55900 | 1.33800  |
| C | 3.57000  | 0.10100  | 3.11900  |
| H | 4.00600  | -0.73600 | 3.67500  |
| H | 3.89100  | 1.03100  | 3.59800  |
| H | 2.47800  | 0.03900  | 3.22500  |
| C | 3.75600  | -1.23700 | -0.42900 |
| H | 4.77700  | -0.96900 | -0.74400 |
| H | 3.54700  | -2.24700 | -0.81300 |
| H | 3.05500  | -0.53400 | -0.90500 |
| C | 0.17900  | -3.62200 | 1.29300  |
| H | 0.78000  | -4.04300 | 0.46200  |
| H | 0.63100  | -4.00000 | 2.23300  |
| H | -0.85100 | -4.01600 | 1.21500  |
| C | -1.35900 | 0.75200  | -3.70600 |
| H | -1.77900 | 1.72800  | -3.44100 |
| H | -0.27000 | 0.74900  | -3.57300 |
| H | -1.66100 | 0.42000  | -4.70500 |
| O | -1.96900 | -0.27700 | -2.86000 |
| H | 5.08300  | 0.23600  | 1.55700  |

- Enantioselective reduction of the simplified imine using the simplified organocatalyst, obtaining the *S*-amine as product.

Reactants interaction complex (RIC):

|    |          |          |          |
|----|----------|----------|----------|
| 43 |          |          |          |
| Si | 0.45500  | 1.46800  | 0.04000  |
| N  | -2.08400 | -1.05300 | -0.93500 |
| C  | -1.63200 | -1.61400 | 0.37100  |
| C  | -0.14500 | -1.33200 | 0.65400  |
| O  | 0.46500  | -0.45800 | -0.03700 |
| C  | -2.72100 | -2.07300 | -1.82300 |

|    |          |          |          |
|----|----------|----------|----------|
| C  | -1.98500 | -3.11500 | 0.27700  |
| H  | -1.08000 | -3.72900 | 0.10700  |
| C  | -2.95500 | -3.28200 | -0.90800 |
| H  | -2.44700 | -3.47200 | 1.21500  |
| H  | -4.00300 | -3.31200 | -0.55500 |
| H  | -2.77800 | -4.23300 | -1.44100 |
| H  | -2.04100 | -2.30900 | -2.67200 |
| H  | -3.66200 | -1.66200 | -2.24900 |
| H  | -2.20700 | -1.09200 | 1.19600  |
| C  | -1.87200 | 0.24300  | -1.33500 |
| O  | -1.32100 | 1.13800  | -0.66700 |
| Cl | -0.54900 | 1.10700  | 2.00200  |
| N  | 0.59200  | -1.99400 | 1.57400  |
| Cl | 1.12900  | 1.21800  | -2.01600 |
| N  | 3.05300  | -0.60900 | 2.11000  |
| C  | 3.80300  | -0.22800 | 1.12600  |
| Cl | -0.04000 | 3.48700  | -0.10100 |
| H  | 1.78600  | 1.51200  | 0.62600  |
| H  | 1.59400  | -1.63000 | 1.76200  |
| C  | -2.17600 | 1.87700  | -3.05000 |
| H  | -2.29800 | 2.62800  | -2.25700 |
| H  | -1.14500 | 1.88600  | -3.42800 |
| H  | -2.92400 | 1.96900  | -3.84200 |
| H  | 4.46100  | 0.65500  | 1.12300  |
| C  | 3.78000  | -0.99600 | -0.15500 |
| H  | 3.00100  | -0.56700 | -0.82500 |
| H  | 4.73400  | -0.93700 | -0.69100 |
| H  | 3.52600  | -2.05500 | -0.02400 |
| C  | 2.98000  | 0.18400  | 3.34300  |
| H  | 1.99000  | 0.69200  | 3.37500  |
| H  | 3.03600  | -0.49600 | 4.20900  |
| H  | 3.75100  | 0.96000  | 3.46300  |

|   |          |          |          |
|---|----------|----------|----------|
| C | 0.07600  | -2.98300 | 2.53600  |
| H | 0.02900  | -3.99200 | 2.09200  |
| H | 0.76500  | -3.03400 | 3.40300  |
| H | -0.91700 | -2.71000 | 2.93300  |
| O | -2.46100 | 0.53000  | -2.53200 |

Transition state (TS):

|    |          |          |          |
|----|----------|----------|----------|
| 43 |          |          |          |
| Si | 0.59388  | 2.48946  | 1.93652  |
| N  | -1.86778 | 0.32298  | 0.51854  |
| C  | -1.28985 | -0.52674 | 1.60619  |
| C  | 0.25615  | -0.41603 | 1.62874  |
| O  | 0.61234  | 0.73063  | 2.19004  |
| C  | -2.45309 | -0.47381 | -0.60003 |
| C  | -1.89227 | -1.91291 | 1.32884  |
| H  | -1.18904 | -2.73330 | 1.57515  |
| C  | -2.29910 | -1.93891 | -0.15785 |
| H  | -2.77904 | -2.07006 | 1.97312  |
| H  | -3.23674 | -2.50271 | -0.30354 |
| H  | -1.52857 | -2.44900 | -0.76484 |
| H  | -1.91310 | -0.25532 | -1.54760 |
| H  | -3.51597 | -0.18105 | -0.74178 |
| H  | -1.64255 | -0.12522 | 2.60150  |
| C  | -1.73109 | 1.67942  | 0.50377  |
| O  | -1.22761 | 2.35877  | 1.44639  |
| Cl | 0.03269  | 2.71275  | 3.95986  |
| N  | 1.23808  | -1.21239 | 1.34054  |
| Cl | 0.98307  | 2.04877  | -0.24039 |
| Cl | 0.50992  | 4.54566  | 1.48005  |
| H  | 2.12282  | 2.47627  | 2.21528  |

|   |          |          |          |
|---|----------|----------|----------|
| H | 3.04432  | -0.24457 | 2.19979  |
| N | 3.40880  | 0.51278  | 2.81602  |
| C | 3.54817  | 1.76389  | 2.27523  |
| H | 3.85136  | 2.59094  | 2.94427  |
| C | -2.06739 | 3.73767  | -0.65625 |
| H | -2.24539 | 4.23800  | 0.30433  |
| H | -1.01723 | 3.86280  | -0.96167 |
| H | -2.77774 | 4.03196  | -1.43281 |
| O | -2.34428 | 2.29617  | -0.54031 |
| C | 2.97508  | 0.38749  | 4.22436  |
| H | 3.15694  | -0.64194 | 4.57489  |
| H | 3.51462  | 1.07998  | 4.88875  |
| H | 1.88200  | 0.59619  | 4.32415  |
| C | 3.98302  | 1.84763  | 0.84943  |
| H | 3.50609  | 1.08626  | 0.20073  |
| H | 3.70603  | 2.81264  | 0.38385  |
| H | 5.07250  | 1.73309  | 0.75379  |
| C | 1.09576  | -2.53611 | 0.73544  |
| H | 2.07639  | -3.03976 | 0.83297  |
| H | 0.33606  | -3.18198 | 1.21367  |
| H | 0.86841  | -2.46405 | -0.34274 |

Products interaction complex (PIC):

|    |          |          |          |
|----|----------|----------|----------|
| 43 |          |          |          |
| Si | -0.06600 | 1.48900  | 0.51700  |
| N  | -2.11800 | -1.29200 | -0.92100 |
| C  | -2.02400 | -1.43000 | 0.56600  |
| C  | -0.53800 | -1.36000 | 0.96700  |
| O  | -0.20800 | -0.05200 | 1.07700  |
| C  | -2.93900 | -2.36800 | -1.55300 |

|    |          |          |          |
|----|----------|----------|----------|
| C  | -2.77200 | -2.73400 | 0.88700  |
| H  | -2.07500 | -3.55600 | 1.15900  |
| C  | -3.58000 | -3.11100 | -0.37000 |
| H  | -3.43400 | -2.59700 | 1.76200  |
| H  | -4.64000 | -2.81800 | -0.25200 |
| H  | -3.57800 | -4.20300 | -0.53400 |
| H  | -2.27900 | -3.02700 | -2.15800 |
| H  | -3.69100 | -1.92200 | -2.24000 |
| H  | -2.55000 | -0.55500 | 1.05100  |
| C  | -1.58100 | -0.23800 | -1.60800 |
| O  | -0.88100 | 0.69000  | -1.16700 |
| Cl | 0.78000  | 2.25800  | 2.19500  |
| N  | 0.42500  | -2.17100 | 1.20200  |
| Cl | 1.40200  | 1.92800  | -0.80900 |
| N  | 3.51600  | -0.90600 | 2.27400  |
| C  | 3.89500  | 0.13500  | 1.26400  |
| Cl | -1.82200 | 2.52600  | 0.54400  |
| H  | 3.29600  | 1.07000  | 1.35800  |
| H  | 2.65200  | -1.37700 | 1.96200  |
| C  | -1.29000 | 0.80300  | -3.74100 |
| H  | -1.78500 | 1.74000  | -3.46400 |
| H  | -0.20900 | 0.86800  | -3.56600 |
| H  | -1.53200 | 0.48300  | -4.76100 |
| H  | 4.95500  | 0.41100  | 1.45700  |
| C  | 3.74500  | -0.42400 | -0.15100 |
| H  | 4.03800  | 0.32100  | -0.89800 |
| H  | 4.36300  | -1.31700 | -0.29400 |
| H  | 2.70300  | -0.70400 | -0.36000 |
| C  | 3.26100  | -0.29000 | 3.60800  |
| H  | 2.44700  | 0.45300  | 3.62200  |
| H  | 3.00900  | -1.09100 | 4.32000  |
| H  | 4.17800  | 0.19800  | 3.97200  |

|   |          |          |          |
|---|----------|----------|----------|
| C | 0.36800  | -3.62700 | 1.15800  |
| H | -0.63300 | -4.08400 | 1.05500  |
| H | 1.00400  | -3.97600 | 0.31900  |
| H | 0.83600  | -4.00800 | 2.08900  |
| O | -1.86100 | -0.29100 | -2.95000 |

- Enantioselective reduction of the imine **1** using the organocatalyst **16**, obtaining the *R*-amine **2** as product.

Reactants interaction complex (RIC):

|    |          |          |          |
|----|----------|----------|----------|
| 79 |          |          |          |
| Si | -0.05000 | 2.11100  | -1.60500 |
| N  | -2.74300 | -0.37200 | -1.82500 |
| C  | -2.26300 | -0.52500 | -0.41300 |
| C  | -0.73800 | -0.37800 | -0.27300 |
| O  | -0.05600 | 0.23000  | -1.14900 |
| C  | -3.50200 | -1.58000 | -2.26600 |
| C  | -2.79500 | -1.90100 | 0.04500  |
| H  | -1.98700 | -2.65800 | 0.08000  |
| C  | -3.86100 | -2.32500 | -0.97400 |
| H  | -3.20800 | -1.84300 | 1.06900  |
| H  | -4.87400 | -2.05100 | -0.62400 |
| H  | -3.86900 | -3.41900 | -1.12300 |
| H  | -2.85600 | -2.19700 | -2.93000 |
| H  | -4.41100 | -1.28400 | -2.84400 |
| H  | -2.71600 | 0.31500  | 0.20000  |
| C  | -2.54300 | 0.76500  | -2.57800 |
| O  | -1.82800 | 1.66500  | -2.09000 |
| Cl | -0.96600 | 2.32900  | 0.45500  |
| N  | -0.02600 | -0.92800 | 0.75000  |
| Cl | 0.53000  | 1.32000  | -3.54600 |

|    |          |          |          |
|----|----------|----------|----------|
| N  | 3.00300  | -0.79700 | 0.58200  |
| C  | 3.66500  | 0.05900  | 1.29100  |
| Cl | -0.45500 | 4.06100  | -2.21400 |
| H  | 1.30500  | 2.21700  | -1.07600 |
| C  | 2.95000  | 0.66600  | 2.45400  |
| C  | 1.59300  | 1.81300  | 4.60800  |
| C  | 3.28800  | 0.29800  | 3.76300  |
| C  | 1.93700  | 1.60400  | 2.22000  |
| C  | 1.25700  | 2.17400  | 3.30000  |
| C  | 2.60700  | 0.87700  | 4.83800  |
| H  | 4.07000  | -0.43600 | 3.94200  |
| H  | 1.67100  | 1.89400  | 1.19800  |
| H  | 0.46200  | 2.89800  | 3.10500  |
| H  | 2.86700  | 0.59600  | 5.85700  |
| H  | 1.06700  | 2.26200  | 5.44900  |
| C  | 3.49500  | -1.45700 | -0.58800 |
| C  | 4.25200  | -2.85500 | -2.88200 |
| C  | 2.87800  | -1.16100 | -1.81800 |
| C  | 4.48500  | -2.45200 | -0.50100 |
| C  | 4.85300  | -3.14900 | -1.65500 |
| C  | 3.26700  | -1.86100 | -2.95900 |
| H  | 2.10100  | -0.38700 | -1.88000 |
| H  | 4.95000  | -2.68300 | 0.45300  |
| H  | 5.61700  | -3.92300 | -1.59600 |
| H  | 2.80000  | -1.62500 | -3.91600 |
| H  | 4.54900  | -3.39400 | -3.77800 |
| C  | 5.06100  | 0.54800  | 1.06600  |
| H  | 5.58300  | 0.00800  | 0.26200  |
| H  | 5.67400  | 0.47000  | 1.97400  |
| H  | 5.05300  | 1.61400  | 0.78000  |
| H  | 1.02800  | -0.79400 | 0.75100  |
| C  | -0.59000 | -1.46000 | 1.96700  |

|   |          |          |          |
|---|----------|----------|----------|
| C | -0.33800 | -2.80500 | 2.30700  |
| C | -1.31200 | -0.61600 | 2.82400  |
| C | -0.84200 | -3.31400 | 3.49500  |
| H | 0.25900  | -3.43500 | 1.64400  |
| C | -1.82800 | -1.12100 | 4.01800  |
| H | -1.45600 | 0.44000  | 2.56300  |
| C | -1.58900 | -2.46400 | 4.34200  |
| H | -0.66700 | -4.34600 | 3.79400  |
| H | -2.38700 | -0.46600 | 4.68100  |
| O | -2.03500 | -3.10600 | 5.47100  |
| C | -2.76100 | -2.32800 | 6.45500  |
| H | -2.13200 | -1.52100 | 6.84400  |
| H | -3.69500 | -1.95100 | 6.02800  |
| H | -2.95800 | -3.08000 | 7.23100  |
| C | -3.20600 | 1.03500  | -3.96300 |
| C | -2.81600 | 2.45500  | -4.39000 |
| H | -1.72600 | 2.55000  | -4.54900 |
| H | -3.31100 | 2.75300  | -5.31700 |
| H | -3.04800 | 3.20200  | -3.61600 |
| C | -4.73000 | 0.94500  | -3.82700 |
| H | -5.21400 | 1.20300  | -4.78000 |
| H | -5.08200 | -0.05900 | -3.55200 |
| H | -5.11100 | 1.65500  | -3.08100 |
| C | -2.64400 | 0.01700  | -4.95800 |
| H | -2.92200 | 0.28900  | -5.98600 |
| H | -1.54000 | 0.01100  | -4.93400 |
| H | -2.99100 | -1.00400 | -4.79100 |



Transition state (TS):

|    |          |          |          |
|----|----------|----------|----------|
| 79 |          |          |          |
| Si | 0.73300  | 2.71600  | 0.70300  |
| N  | -2.14900 | 0.71600  | 0.23000  |
| C  | -1.79400 | 0.48600  | 1.67500  |
| C  | -0.27500 | 0.33900  | 1.94100  |
| O  | 0.49600  | 0.96400  | 1.08500  |
| C  | -3.03400 | -0.37900 | -0.27200 |
| C  | -2.60100 | -0.76100 | 2.09200  |
| H  | -1.94700 | -1.65000 | 2.20000  |
| C  | -3.63700 | -1.01500 | 0.98700  |
| H  | -3.07600 | -0.61100 | 3.07800  |
| H  | -4.60900 | -0.55300 | 1.24200  |
| H  | -3.82800 | -2.09300 | 0.85000  |
| H  | -2.42000 | -1.11000 | -0.84400 |
| H  | -3.82100 | 0.02200  | -0.95300 |
| H  | -2.12500 | 1.39700  | 2.25600  |
| C  | -1.75600 | 1.80000  | -0.49900 |
| O  | -0.98700 | 2.65400  | 0.03000  |
| Cl | -0.13000 | 3.21200  | 2.65000  |
| N  | 0.34000  | -0.31200 | 2.89400  |
| Cl | 1.49300  | 2.01600  | -1.21200 |
| N  | 3.18300  | 0.61400  | 2.23000  |
| C  | 3.38600  | 1.97800  | 2.20500  |
| Cl | 0.89800  | 4.73400  | 0.15400  |
| H  | 2.14700  | 2.58100  | 1.33900  |
| C  | 3.11500  | 2.68800  | 3.50100  |
| C  | 2.71300  | 4.01700  | 5.93900  |
| C  | 3.39300  | 2.03800  | 4.71700  |
| C  | 2.63700  | 4.00800  | 3.51600  |
| C  | 2.43800  | 4.66700  | 4.73400  |

|   |          |          |          |
|---|----------|----------|----------|
| C | 3.19300  | 2.70200  | 5.92900  |
| H | 3.77000  | 1.01500  | 4.72700  |
| H | 2.40000  | 4.53100  | 2.58200  |
| H | 2.05000  | 5.68500  | 4.73400  |
| H | 3.40700  | 2.19300  | 6.86700  |
| H | 2.54900  | 4.53000  | 6.88600  |
| C | 3.66500  | -0.35700 | 1.27800  |
| C | 4.62100  | -2.38100 | -0.39800 |
| C | 3.97500  | -0.06600 | -0.05700 |
| C | 3.81300  | -1.67000 | 1.77500  |
| C | 4.29400  | -2.67000 | 0.93200  |
| C | 4.45400  | -1.08400 | -0.88800 |
| H | 3.81200  | 0.93600  | -0.46700 |
| H | 3.54400  | -1.90400 | 2.80500  |
| H | 4.41300  | -3.68500 | 1.31200  |
| H | 4.68600  | -0.85700 | -1.92900 |
| H | 4.99700  | -3.16700 | -1.05000 |
| C | 4.47500  | 2.57200  | 1.36200  |
| H | 5.45700  | 2.13800  | 1.61100  |
| H | 4.55700  | 3.66300  | 1.49800  |
| H | 4.31300  | 2.41400  | 0.27700  |
| H | 2.37000  | 0.26600  | 2.80800  |
| C | -0.27500 | -1.02500 | 3.95700  |
| C | -0.07200 | -2.42200 | 4.04100  |
| C | -0.95300 | -0.34600 | 4.98300  |
| C | -0.55500 | -3.12800 | 5.13400  |
| H | 0.47200  | -2.93500 | 3.24700  |
| C | -1.44100 | -1.04700 | 6.08900  |
| H | -1.08000 | 0.73700  | 4.92500  |
| C | -1.24000 | -2.43000 | 6.15100  |
| H | -0.41400 | -4.20300 | 5.22700  |
| H | -1.95800 | -0.51200 | 6.87900  |

|   |          |          |          |
|---|----------|----------|----------|
| O | -1.67000 | -3.26300 | 7.16600  |
| C | -2.33800 | -2.65500 | 8.29600  |
| H | -1.67100 | -1.94900 | 8.79900  |
| H | -3.27000 | -2.18000 | 7.97700  |
| H | -2.53900 | -3.52700 | 8.93200  |
| C | -2.24700 | 2.13400  | -1.94300 |
| C | -1.64800 | 3.48900  | -2.34000 |
| H | -0.54400 | 3.45500  | -2.37000 |
| H | -1.99700 | 3.81600  | -3.32200 |
| H | -1.88300 | 4.27500  | -1.60700 |
| C | -3.77600 | 2.23700  | -1.95900 |
| H | -4.12800 | 2.55000  | -2.95200 |
| H | -4.27700 | 1.28700  | -1.72900 |
| H | -4.13600 | 2.99100  | -1.24600 |
| C | -1.72100 | 1.04000  | -2.87600 |
| H | -1.86300 | 1.32500  | -3.92600 |
| H | -0.63300 | 0.89800  | -2.74000 |
| H | -2.20400 | 0.07100  | -2.73800 |

Products interaction complex (PIC):

|    |          |          |          |
|----|----------|----------|----------|
| 79 |          |          |          |
| Si | -0.63800 | 2.89600  | -0.70000 |
| N  | -2.57200 | -0.15000 | -1.25000 |
| C  | -2.79300 | 0.42100  | 0.11700  |
| C  | -1.42000 | 0.54400  | 0.82100  |
| O  | -0.82500 | 1.68000  | 0.45000  |
| C  | -3.21000 | -1.49400 | -1.39100 |
| C  | -3.81500 | -0.50900 | 0.78700  |
| H  | -3.58500 | -0.69300 | 1.85200  |
| C  | -3.82700 | -1.81700 | -0.02200 |

|    |          |          |          |
|----|----------|----------|----------|
| H  | -4.81600 | -0.03500 | 0.77700  |
| H  | -4.85200 | -2.21400 | -0.12500 |
| H  | -3.24300 | -2.60100 | 0.50000  |
| H  | -2.44300 | -2.24600 | -1.69300 |
| H  | -3.98000 | -1.45400 | -2.19800 |
| H  | -3.22400 | 1.46100  | 0.01800  |
| C  | -1.84300 | 0.49700  | -2.21500 |
| O  | -1.28500 | 1.58300  | -1.93600 |
| Cl | 0.03000  | 4.25600  | 0.66800  |
| N  | -0.75700 | -0.19000 | 1.64800  |
| Cl | 1.04000  | 2.85500  | -1.86700 |
| N  | 2.39400  | -0.21900 | 0.12600  |
| C  | 3.37200  | 0.89700  | 0.24300  |
| Cl | -2.32900 | 3.92900  | -1.24300 |
| H  | 3.29200  | 1.53600  | -0.68200 |
| C  | 3.04000  | 1.73000  | 1.47100  |
| C  | 2.47900  | 3.31000  | 3.71800  |
| C  | 3.01100  | 1.15300  | 2.75000  |
| C  | 2.78500  | 3.10000  | 1.32300  |
| C  | 2.50500  | 3.88600  | 2.44500  |
| C  | 2.73100  | 1.94200  | 3.86800  |
| H  | 3.20300  | 0.08800  | 2.87200  |
| H  | 2.78800  | 3.55700  | 0.33100  |
| H  | 2.29400  | 4.94700  | 2.32100  |
| H  | 2.70400  | 1.48900  | 4.85700  |
| H  | 2.25500  | 3.92100  | 4.58900  |
| C  | 2.32300  | -1.06300 | -0.97100 |
| C  | 2.20100  | -2.90600 | -3.10700 |
| C  | 3.08100  | -0.84900 | -2.15500 |
| C  | 1.47000  | -2.20000 | -0.90200 |
| C  | 1.43700  | -3.10900 | -1.95300 |
| C  | 3.01400  | -1.76800 | -3.19500 |

|   |          |          |          |
|---|----------|----------|----------|
| H | 3.70800  | 0.03200  | -2.25000 |
| H | 0.87000  | -2.37200 | -0.00900 |
| H | 0.80800  | -3.99500 | -1.87500 |
| H | 3.60500  | -1.60000 | -4.09500 |
| H | 2.17600  | -3.62400 | -3.91700 |
| C | 4.80800  | 0.35900  | 0.35500  |
| H | 4.92100  | -0.32000 | 1.20900  |
| H | 5.52000  | 1.18000  | 0.49100  |
| H | 5.10300  | -0.20300 | -0.53800 |
| H | 1.71100  | -0.31400 | 0.88200  |
| C | -1.20700 | -1.38000 | 2.28400  |
| C | -0.96400 | -2.63800 | 1.69400  |
| C | -1.75600 | -1.29800 | 3.57700  |
| C | -1.29500 | -3.80200 | 2.37400  |
| H | -0.48000 | -2.69000 | 0.71000  |
| C | -2.09600 | -2.46200 | 4.27000  |
| H | -1.90100 | -0.32300 | 4.04500  |
| C | -1.86800 | -3.70200 | 3.65900  |
| H | -1.11000 | -4.78600 | 1.94600  |
| H | -2.51700 | -2.39000 | 5.26800  |
| O | -2.16800 | -4.93400 | 4.20200  |
| C | -2.66900 | -4.96800 | 5.56000  |
| H | -1.93600 | -4.53800 | 6.24900  |
| H | -3.63600 | -4.46100 | 5.62200  |
| H | -2.77900 | -6.04700 | 5.73000  |
| C | -1.68800 | -0.01900 | -3.67800 |
| C | -0.87800 | 1.02600  | -4.45600 |
| H | 0.11400  | 1.19000  | -4.00200 |
| H | -0.72100 | 0.72100  | -5.49500 |
| H | -1.36800 | 2.00900  | -4.45900 |
| C | -3.08200 | -0.16000 | -4.29900 |
| H | -3.00200 | -0.46800 | -5.35100 |

|   |          |          |          |
|---|----------|----------|----------|
| H | -3.70700 | -0.90800 | -3.79500 |
| H | -3.62700 | 0.79300  | -4.29100 |
| C | -0.92700 | -1.34400 | -3.64300 |
| H | -0.74900 | -1.72200 | -4.65800 |
| H | 0.07300  | -1.22700 | -3.18600 |
| H | -1.44400 | -2.13600 | -3.08900 |

- Enantioselective reduction of the imine **1** using the organocatalyst **16**, obtaining the *S*-amine **2** as product.

Reactants interaction complex (RIC):

|    |          |          |          |
|----|----------|----------|----------|
| 79 |          |          |          |
| Si | -0.65900 | 2.40400  | -0.91900 |
| N  | -2.56100 | -0.53000 | -2.03700 |
| C  | -2.10800 | -0.93100 | -0.66500 |
| C  | -0.68700 | -0.44500 | -0.32900 |
| O  | -0.16500 | 0.53000  | -0.94200 |
| C  | -2.95500 | -1.72600 | -2.84100 |
| C  | -2.26300 | -2.46700 | -0.62300 |
| H  | -1.28200 | -2.97700 | -0.69800 |
| C  | -3.14300 | -2.85600 | -1.82000 |
| H  | -2.70800 | -2.79300 | 0.33500  |
| H  | -4.20300 | -2.94800 | -1.51700 |
| H  | -2.85200 | -3.83600 | -2.23700 |
| H  | -2.14600 | -1.96100 | -3.56900 |
| H  | -3.89100 | -1.52300 | -3.41500 |
| H  | -2.79200 | -0.42800 | 0.08700  |
| C  | -2.65500 | 0.78000  | -2.45500 |
| O  | -2.22900 | 1.66400  | -1.68300 |
| Cl | -1.65600 | 1.83400  | 1.01700  |
| N  | 0.11200  | -1.05700 | 0.59100  |

|    |          |          |          |
|----|----------|----------|----------|
| Cl | 0.18100  | 2.30900  | -2.93600 |
| N  | 2.76700  | 0.09000  | 1.53300  |
| C  | 3.76600  | 0.44200  | 0.79000  |
| Cl | -1.55100 | 4.27700  | -1.09100 |
| H  | 0.60300  | 2.71200  | -0.25700 |
| C  | 3.83000  | -0.12200 | -0.59100 |
| C  | 3.97700  | -1.12500 | -3.19500 |
| C  | 2.91400  | 0.31100  | -1.55800 |
| C  | 4.81400  | -1.06500 | -0.92000 |
| C  | 4.88300  | -1.56600 | -2.22300 |
| C  | 2.99400  | -0.18900 | -2.86200 |
| H  | 2.13000  | 1.03600  | -1.30500 |
| H  | 5.51800  | -1.40900 | -0.16500 |
| H  | 5.64500  | -2.29700 | -2.48300 |
| H  | 2.28200  | 0.16700  | -3.60900 |
| H  | 4.04100  | -1.51000 | -4.21100 |
| C  | 2.54100  | 0.54300  | 2.87100  |
| C  | 1.90400  | 1.27400  | 5.49000  |
| C  | 1.43400  | 1.37900  | 3.11100  |
| C  | 3.32900  | 0.07300  | 3.93700  |
| C  | 2.99900  | 0.44200  | 5.24400  |
| C  | 1.12600  | 1.74000  | 4.42200  |
| H  | 0.82200  | 1.74300  | 2.28000  |
| H  | 4.17600  | -0.58100 | 3.74600  |
| H  | 3.60300  | 0.07800  | 6.07400  |
| H  | 0.27100  | 2.39100  | 4.61200  |
| H  | 1.65600  | 1.56200  | 6.50800  |
| C  | 4.87000  | 1.38900  | 1.14400  |
| H  | 4.77500  | 2.32000  | 0.56100  |
| H  | 5.86000  | 0.97300  | 0.91200  |
| H  | 4.86900  | 1.67700  | 2.20500  |
| H  | 1.07200  | -0.64300 | 0.77000  |

|   |          |          |          |
|---|----------|----------|----------|
| C | -0.34000 | -2.01500 | 1.57300  |
| C | 0.23500  | -3.30200 | 1.58800  |
| C | -1.28200 | -1.62700 | 2.53800  |
| C | -0.16300 | -4.21500 | 2.55400  |
| H | 0.99400  | -3.57100 | 0.85100  |
| C | -1.69100 | -2.54100 | 3.51100  |
| H | -1.68300 | -0.60700 | 2.53700  |
| C | -1.12800 | -3.82500 | 3.51100  |
| H | -2.41800 | -2.23800 | 4.26000  |
| H | 0.26000  | -5.21800 | 2.60200  |
| O | -1.43200 | -4.83200 | 4.39300  |
| C | -2.35100 | -4.53400 | 5.47400  |
| H | -1.95000 | -3.73700 | 6.10600  |
| H | -3.33800 | -4.28600 | 5.07600  |
| H | -2.37300 | -5.49000 | 6.01500  |
| C | -3.32300 | 1.23600  | -3.78700 |
| C | -2.48000 | 0.69600  | -4.94500 |
| H | -2.54500 | -0.38500 | -5.07400 |
| H | -2.79100 | 1.15400  | -5.89400 |
| H | -1.41600 | 0.96100  | -4.81500 |
| C | -4.77100 | 0.73400  | -3.83100 |
| H | -5.35000 | 1.09900  | -2.97200 |
| H | -5.27700 | 1.10800  | -4.73200 |
| H | -4.84900 | -0.36200 | -3.85200 |
| C | -3.31400 | 2.76800  | -3.80500 |
| H | -3.76200 | 3.19900  | -2.89600 |
| H | -2.28500 | 3.17200  | -3.82400 |
| H | -3.84200 | 3.17000  | -4.67200 |



Transition state (TS):

|    |          |          |          |
|----|----------|----------|----------|
| 79 |          |          |          |
| Si | 0.35100  | 2.56800  | 1.59900  |
| N  | -2.43200 | 0.42400  | 1.10500  |
| C  | -1.90600 | 0.00800  | 2.45300  |
| C  | -0.36200 | -0.06600 | 2.53700  |
| O  | 0.27200  | 0.75600  | 1.73600  |
| C  | -3.30900 | -0.64200 | 0.53200  |
| C  | -2.59500 | -1.34100 | 2.74900  |
| H  | -1.88800 | -2.18900 | 2.64700  |
| C  | -3.73500 | -1.49600 | 1.73300  |
| H  | -2.96200 | -1.37500 | 3.79100  |
| H  | -4.69300 | -1.14300 | 2.15500  |
| H  | -3.88700 | -2.55200 | 1.45100  |
| H  | -2.72500 | -1.23700 | -0.20600 |
| H  | -4.18700 | -0.20000 | 0.00400  |
| H  | -2.22100 | 0.79600  | 3.20000  |
| C  | -2.19400 | 1.63600  | 0.52400  |
| O  | -1.42900 | 2.45600  | 1.10800  |
| Cl | -0.33000 | 2.67500  | 3.68600  |
| N  | 0.39700  | -0.82500 | 3.28300  |
| Cl | 0.94000  | 2.19200  | -0.44800 |
| N  | 2.67400  | 1.16100  | 3.93100  |
| C  | 3.13300  | 2.00500  | 2.94200  |
| Cl | 0.30300  | 4.64800  | 1.37600  |
| H  | 1.82300  | 2.46400  | 2.08500  |
| C  | 3.86100  | 1.29300  | 1.83700  |
| C  | 5.29600  | -0.03700 | -0.17300 |
| C  | 3.22600  | 0.33800  | 1.03100  |
| C  | 5.22500  | 1.57500  | 1.63400  |
| C  | 5.93700  | 0.91100  | 0.63500  |

|   |          |          |          |
|---|----------|----------|----------|
| C | 3.94500  | -0.32200 | 0.02800  |
| H | 2.15400  | 0.11100  | 1.16300  |
| H | 5.73800  | 2.30800  | 2.25600  |
| H | 6.99100  | 1.13400  | 0.48100  |
| H | 3.43600  | -1.05000 | -0.60300 |
| H | 5.85300  | -0.54600 | -0.95900 |
| C | 2.20200  | 1.49300  | 5.25300  |
| C | 1.38800  | 1.91300  | 7.90000  |
| C | 1.86300  | 2.78400  | 5.68200  |
| C | 2.10900  | 0.40200  | 6.14600  |
| C | 1.70700  | 0.62200  | 7.46200  |
| C | 1.45800  | 2.98400  | 7.00600  |
| H | 1.86600  | 3.63300  | 4.99100  |
| H | 2.33200  | -0.61100 | 5.80800  |
| H | 1.63900  | -0.21900 | 8.15100  |
| H | 1.18500  | 3.98800  | 7.33300  |
| H | 1.07600  | 2.07900  | 8.92800  |
| C | 3.57300  | 3.40200  | 3.26100  |
| H | 2.75700  | 4.01700  | 3.69600  |
| H | 3.89000  | 3.94800  | 2.35500  |
| H | 4.40600  | 3.41700  | 3.98000  |
| H | 2.40200  | 0.19400  | 3.62800  |
| C | -0.05000 | -1.76200 | 4.25300  |
| C | 0.26000  | -3.12900 | 4.06500  |
| C | -0.66000 | -1.33300 | 5.44500  |
| C | -0.05300 | -4.05300 | 5.05200  |
| H | 0.75300  | -3.44600 | 3.14700  |
| C | -0.97800 | -2.25500 | 6.44600  |
| H | -0.86600 | -0.27200 | 5.59800  |
| C | -0.67500 | -3.60500 | 6.23700  |
| H | -1.44500 | -1.91200 | 7.36300  |
| H | 0.17400  | -5.11100 | 4.93600  |

|   |          |          |          |
|---|----------|----------|----------|
| O | -0.93400 | -4.63600 | 7.11900  |
| C | -1.54300 | -4.29800 | 8.38700  |
| H | -0.89100 | -3.63200 | 8.95900  |
| H | -2.53400 | -3.86300 | 8.23000  |
| H | -1.61800 | -5.28200 | 8.86900  |
| C | -2.85700 | 2.14500  | -0.79400 |
| C | -2.37400 | 1.24400  | -1.93400 |
| H | -2.77900 | 0.23200  | -1.90100 |
| H | -2.64900 | 1.67100  | -2.90800 |
| H | -1.27100 | 1.16900  | -1.93400 |
| C | -4.38200 | 2.13700  | -0.64300 |
| H | -4.70500 | 2.74800  | 0.21100  |
| H | -4.85700 | 2.56600  | -1.53500 |
| H | -4.80000 | 1.12800  | -0.51400 |
| C | -2.38200 | 3.58400  | -1.03200 |
| H | -2.57600 | 4.23200  | -0.16500 |
| H | -1.28900 | 3.63400  | -1.18200 |
| H | -2.85800 | 4.03000  | -1.90900 |

Products interaction complex (PIC):

|    |          |          |          |
|----|----------|----------|----------|
| 79 |          |          |          |
| Si | -0.03900 | 2.21200  | -2.44100 |
| N  | -2.54200 | 0.12300  | -0.75900 |
| C  | -1.30000 | 0.30700  | 0.06100  |
| C  | -0.09700 | -0.14300 | -0.79200 |
| O  | 0.41700  | 0.91300  | -1.45400 |
| C  | -3.51100 | -0.78900 | -0.07800 |
| C  | -1.52200 | -0.48300 | 1.35600  |
| H  | -0.64000 | -1.09700 | 1.62400  |
| C  | -2.77800 | -1.34500 | 1.15300  |

|    |          |          |          |
|----|----------|----------|----------|
| H  | -1.64900 | 0.22000  | 2.20600  |
| H  | -3.42400 | -1.32400 | 2.04800  |
| H  | -2.49700 | -2.40600 | 0.99700  |
| H  | -3.82800 | -1.59900 | -0.77600 |
| H  | -4.42100 | -0.21100 | 0.20800  |
| H  | -1.17500 | 1.40700  | 0.30000  |
| C  | -2.70100 | 0.70800  | -1.98400 |
| O  | -1.76800 | 1.39400  | -2.46700 |
| Cl | 1.83900  | 3.03400  | -2.30500 |
| N  | 0.49000  | -1.26800 | -1.00200 |
| Cl | -0.09600 | 1.93700  | -4.45100 |
| N  | 2.02800  | 0.63500  | 1.96900  |
| C  | 2.96400  | 0.95900  | 0.84700  |
| Cl | -1.01900 | 3.77600  | -1.52900 |
| H  | 2.32800  | 1.22300  | -0.05200 |
| C  | 3.77600  | -0.29100 | 0.54600  |
| C  | 5.26200  | -2.59000 | -0.06400 |
| C  | 3.62300  | -0.92000 | -0.69800 |
| C  | 4.68000  | -0.81600 | 1.48100  |
| C  | 5.41900  | -1.96300 | 1.17600  |
| C  | 4.36400  | -2.06600 | -0.99900 |
| H  | 2.91100  | -0.52400 | -1.43200 |
| H  | 4.82100  | -0.32700 | 2.44200  |
| H  | 6.12100  | -2.36500 | 1.90400  |
| H  | 4.23500  | -2.55100 | -1.96600 |
| H  | 5.83800  | -3.48200 | -0.30100 |
| C  | 1.06600  | 1.58300  | 2.39000  |
| C  | -1.03300 | 3.26200  | 3.21700  |
| C  | 0.61300  | 2.62300  | 1.55000  |
| C  | 0.46000  | 1.40000  | 3.65900  |
| C  | -0.57900 | 2.23900  | 4.05500  |
| C  | -0.42700 | 3.45000  | 1.97000  |

|   |          |          |          |
|---|----------|----------|----------|
| H | 1.07100  | 2.78900  | 0.57200  |
| H | 0.80600  | 0.61600  | 4.32400  |
| H | -1.03800 | 2.09800  | 5.03300  |
| H | -0.76800 | 4.25200  | 1.31200  |
| H | -1.83900 | 3.91500  | 3.53600  |
| C | 3.88900  | 2.14100  | 1.16400  |
| H | 3.31900  | 3.06200  | 1.33700  |
| H | 4.56400  | 2.33600  | 0.32000  |
| H | 4.51100  | 1.96700  | 2.04600  |
| H | 2.47900  | 0.12200  | 2.73000  |
| C | 0.18200  | -2.50900 | -0.37900 |
| C | -0.87900 | -3.30600 | -0.85800 |
| C | 1.04300  | -2.99200 | 0.62500  |
| C | -1.09000 | -4.57100 | -0.32100 |
| H | -1.51400 | -2.93700 | -1.66000 |
| C | 0.83500  | -4.25800 | 1.17200  |
| H | 1.88100  | -2.37400 | 0.96100  |
| C | -0.23100 | -5.03400 | 0.69500  |
| H | 1.50400  | -4.62600 | 1.94400  |
| H | -1.89100 | -5.21500 | -0.67700 |
| O | -0.57400 | -6.29300 | 1.14700  |
| C | 0.28900  | -6.91400 | 2.12800  |
| H | 1.30000  | -7.03300 | 1.72600  |
| H | 0.28500  | -6.33800 | 3.05700  |
| H | -0.19500 | -7.88900 | 2.26700  |
| C | -3.98900 | 0.57700  | -2.85100 |
| C | -4.16400 | -0.89600 | -3.23400 |
| H | -4.30200 | -1.55500 | -2.36700 |
| H | -5.04300 | -1.02600 | -3.87900 |
| H | -3.30100 | -1.27000 | -3.80400 |
| C | -5.17900 | 1.11300  | -2.05000 |
| H | -5.01600 | 2.15200  | -1.73100 |

|   |          |         |          |
|---|----------|---------|----------|
| H | -6.08900 | 1.11500 | -2.66600 |
| H | -5.40300 | 0.52300 | -1.15400 |
| C | -3.79000 | 1.42500 | -4.11400 |
| H | -3.64200 | 2.48800 | -3.87300 |
| H | -2.88800 | 1.12400 | -4.67100 |
| H | -4.64500 | 1.34800 | -4.79100 |

## Mechanistic studies with real compounds

Results for the former calculations, where only the energy barrier between RIC and TS ( $\Delta E_{\text{RIC-TS}}$ ) was taking account:

| <b>UP-conformation</b>                        | Uncatalyzed reaction |           | Catalyst 3 |           | Catalyst 5 |          | Catalyst 6 |           | Catalyst 12 |           | Catalyst 13 |           | Catalyst 14 |           | Catalyst 16 |           |
|-----------------------------------------------|----------------------|-----------|------------|-----------|------------|----------|------------|-----------|-------------|-----------|-------------|-----------|-------------|-----------|-------------|-----------|
|                                               | <i>R</i>             | <i>S</i>  | <i>R</i>   | <i>S</i>  | <i>R</i>   | <i>S</i> | <i>R</i>   | <i>S</i>  | <i>R</i>    | <i>S</i>  | <i>R</i>    | <i>S</i>  | <i>R</i>    | <i>S</i>  | <i>R</i>    | <i>S</i>  |
| <b>E (RIC) (Eh)</b>                           | -0.097484            | -0.097484 | -0.239568  | -0.241484 | n.c        | n.c      | -0.314707  | -0.313685 | -0.279601   | -0.280049 | -0.304736   | -0.306128 | -0.244725   | -0.245157 | -0.310621   | -0.312443 |
| <b>E (TS) (Eh)</b>                            | -0.050661            | -0.050661 | -0.211205  | -0.213466 | n.c        | n.c      | -0.278295  | -0.280899 | -0.249050   | -0.251373 | -0.273985   | -0.276328 | -0.223486   | -0.225336 | -0.280279   | -0.282300 |
| <b>E (PIC) (Eh)</b>                           | -0.138578            | -0.138578 | -0.261901  | -0.266794 | n.c        | n.c      | -0.330338  | -0.335696 | -           | -         | -0.324978   | -0.330173 | -0.271745   | -0.266589 | -           | -         |
| <b>E (RIC) - E (TS) (Eh)</b>                  | 0.046823             | 0.046823  | 0.028363   | 0.028018  | -          | -        | 0.036413   | 0.032786  | 0.030551    | 0.028675  | 0.030751    | 0.029800  | 0.021239    | 0.019821  | 0.030341    | 0.030143  |
| <b>E (RIC) - E (TS) (kcal)</b>                | 29.382036            | 29.382036 | 17.798239  | 17.581271 | -          | -        | 22.849404  | 20.573610 | 19.171304   | 17.993996 | 19.296623   | 18.699693 | 13.327463   | 12.437755 | 19.039533   | 18.914954 |
| <b>E (Enant. S) - E (Enant. R) (kcal)</b>     |                      | 0.000000  |            | -0.216968 |            | -        |            | -2.275793 |             | -1.177307 |             | -0.596930 |             | -0.889707 |             | -0.124579 |
| <b>S/R=Exp(-(E enant S - E enant R)/(RT))</b> |                      | 1.000000  |            | 1.491729  |            | -        |            | 66.351551 |             | 8.759416  |             | 3.005132  |             | 5.155152  |             | 1.258143  |
| <b>ee (%)</b>                                 |                      | 0         |            | 20        |            | -        |            | 97        |             | 80        |             | 50        |             | 68        |             | 11        |

| <b>DOWN-conformation</b>                      | Uncatalyzed reaction |           | Catalyst 3 |              | Catalyst 5 |          | Catalyst 6 |             | Catalyst 12 |              | Catalyst 13 |              | Catalyst 14 |              | Catalyst 16 |              |
|-----------------------------------------------|----------------------|-----------|------------|--------------|------------|----------|------------|-------------|-------------|--------------|-------------|--------------|-------------|--------------|-------------|--------------|
|                                               | <i>R</i>             | <i>S</i>  | <i>R</i>   | <i>S</i>     | <i>R</i>   | <i>S</i> | <i>R</i>   | <i>S</i>    | <i>R</i>    | <i>S</i>     | <i>R</i>    | <i>S</i>     | <i>R</i>    | <i>S</i>     | <i>R</i>    | <i>S</i>     |
| <b>E (RIC) (Eh)</b>                           | -0.097484            | -0.097484 | -0.240563  | -0.241412    | -0.291363  | n.c      | -0.314765  | -0.314527   | -0.279668   | -0.280770    | -0.305645   | -0.305294    | -0.246208   | -0.245187    | -0.309844   | -0.309401    |
| <b>E (TS) (Eh)</b>                            | -0.050661            | -0.050661 | -0.212279  | -0.213950    | -0.213477  | n.c      | -0.278620  | -0.279165   | -0.250119   | -0.251812    | -0.275304   | -0.276931    | -0.224423   | -0.226119    | -0.279021   | -0.280549    |
| <b>E (PIC) (Eh)</b>                           | -0.138578            | -0.138578 | -0.261901  | -0.266899    | -0.298274  | n.c      | -0.330338  | -0.335628   | -0.300139   | -0.300139    | -0.324979   | -0.330173    | -0.269371   | -0.278239    | -0.330763   | -0.338027    |
| <b>E (RIC) - E (TS) (Eh)</b>                  | 0.046823             | 0.046823  | 0.028284   | 0.027462     | -          | -        | 0.036145   | 0.035361    | 0.029549    | 0.028958     | 0.030341    | 0.028363     | 0.021785    | 0.019068     | 0.030824    | 0.028852     |
| <b>E (RIC) - E (TS) (kcal)</b>                | 29.382036            | 29.382036 | 17.748722  | 17.232828    | -          | -        | 22.681325  | 22.189440   | 18.542257   | 18.171199    | 19.039439   | 17.798057    | 13.670422   | 11.965204    | 19.342143   | 18.104965    |
| <b>E (Enant. S) - E (Enant. R) (kcal)</b>     |                      | 0.000000  |            | -0.515893974 |            | -        |            | -0.49188548 |             | -0.371058622 |             | -1.241382229 |             | -1.705218057 |             | -1.237177919 |
| <b>S/R=Exp(-(E enant S - E enant R)/(RT))</b> |                      | 1.000000  |            | 2.588159     |            | -        |            | 2.476118    |             | 1.981733     |             | 9.857559     |             | 23.178535    |             | 9.781460     |
| <b>ee (%)</b>                                 |                      | 0         |            | 44           |            | -        |            | 42          |             | 33           |             | 82           |             | 92           |             | 81           |

|                       | Uncatalyzed reaction | Catalyst 3 | Catalyst 5 | Catalyst 6 | Catalyst 12 | Catalyst 13 | Catalyst 14 | Catalyst 16 |
|-----------------------|----------------------|------------|------------|------------|-------------|-------------|-------------|-------------|
| <b>ee average (%)</b> | 0                    | 32         | -          | 70         | 56          | 66          | 80          | 46          |

Results for the second calculations, where the energy barrier  $\Delta E_{\text{TOT}}$  was taking account:

E (imine 1) (Eh) = 0.097076

E (HSiCl<sub>3</sub>) (Eh) = -0.179294

|                                 | Uncatalyzed reaction | Catalyst 3 | Catalyst 6 | Catalyst 12 | Catalyst 13 | Catalyst 14 | Catalyst 16 |
|---------------------------------|----------------------|------------|------------|-------------|-------------|-------------|-------------|
| <b>E catalyst (Conf 1) (Eh)</b> | -                    | -0.139256  | -0.210245  | -0.177990   | -0.201985   | -0.151496   | -0.205350   |
| <b>E catalyst (Conf 2) (Eh)</b> | -                    | -0.139819  | -0.211703  | -0.177644   | -0.202790   | -0.152195   | Not exist   |

| <b>UP-conformation</b>                                | Uncatalyzed reaction |           | Catalyst 3 |            | Catalyst 6 |            | Catalyst 12 |            | Catalyst 13 |            | Catalyst 14 |           | Catalyst 16 |            |
|-------------------------------------------------------|----------------------|-----------|------------|------------|------------|------------|-------------|------------|-------------|------------|-------------|-----------|-------------|------------|
|                                                       | <i>R</i>             | <i>S</i>  | <i>R</i>   | <i>S</i>   | <i>R</i>   | <i>S</i>   | <i>R</i>    | <i>S</i>   | <i>R</i>    | <i>S</i>   | <i>R</i>    | <i>S</i>  | <i>R</i>    | <i>S</i>   |
| E ABC (Conf 1) (Eh)                                   | -0.082218            | -0.082218 | -0.221474  | -0.221474  | -0.292463  | -0.292463  | -0.260208   | -0.260208  | -0.284203   | -0.284203  | -0.233714   | -0.233714 | -0.287569   | -0.287569  |
| E ABC (conf 2) (Eh)                                   | -0.082218            | -0.082218 | -0.222037  | -0.222037  | -0.293921  | -0.293921  | -0.259862   | -0.259862  | -0.285008   | -0.285008  | -0.234413   | -0.234413 | -           | -          |
| E (RIC) (Eh)                                          | -0.097484            | -0.097484 | -0.239568  | -0.241484  | -0.314707  | -0.313685  | -0.279601   | -0.280049  | -0.304736   | -0.306128  | -0.244725   | -0.245157 | -0.310621   | -0.312443  |
| E (TS) (Eh)                                           | -0.050661            | -0.050661 | -0.211205  | -0.213466  | -0.278295  | -0.280899  | -0.249050   | -0.251373  | -0.273985   | -0.276328  | -0.223486   | -0.225336 | -0.280279   | -0.282300  |
| E (PIC ) (Eh)                                         | -0.138578            | -0.138578 | -0.261901  | -0.266794  | -0.330338  | -0.335696  | -           | -          | -0.324978   | -0.330173  | -0.271745   | -0.266589 | -           | -          |
| E (ABC) - E (RIC) (conf 1) (Eh)                       | -0.015266            | -0.015266 | -0.018094  | -0.020010  | -0.022244  | -0.021222  | -0.019393   | -0.019841  | -0.020533   | -0.021925  | -0.011011   | -0.011443 | -0.023052   | -0.024875  |
| E (ABC) - E (RIC) (conf 2) (Eh)                       | -0.015266            | -0.015266 | -0.017531  | -0.019447  | -0.020786  | -0.019763  | -0.019739   | -0.020186  | -0.019728   | -0.021120  | -0.010312   | -0.010744 | -           | -          |
| E (ABC) - E (RIC) (conf 1) (kcal)                     | -9.579515            | -9.579515 | -11.354248 | -12.556455 | -13.958574 | -13.316833 | -12.169307  | -12.450130 | -12.884881  | -13.757978 | -6.909213   | -7.180730 | -14.465281  | -15.609086 |
| E (ABC) - E (RIC) (conf 2) (kcal)                     | -9.579515            | -9.579515 | -11.000816 | -12.203023 | -13.043433 | -12.401693 | -12.386155  | -12.666978 | -12.379717  | -13.252814 | -6.470678   | -6.742195 | -           | -          |
| E (RIC) - E (TS) (Eh)                                 | 0.046823             | 0.046823  | 0.028363   | 0.028018   | 0.036413   | 0.032786   | 0.030551    | 0.028675   | 0.030751    | 0.029800   | 0.021239    | 0.019821  | 0.030341    | 0.030143   |
| E (RIC) - E (TS) (kcal)                               | 29.382036            | 29.382036 | 17.798239  | 17.581271  | 22.849404  | 20.573610  | 19.171304   | 17.993996  | 19.296623   | 18.699693  | 13.327463   | 12.437755 | 19.039533   | 18.914954  |
| E TOT (conf 1) (kcal)                                 | 19.802521            | 19.802521 | 6.443990   | 5.024816   | 8.890830   | 7.256778   | 7.001996    | 5.543866   | 6.411743    | 4.941715   | 6.418250    | 5.257026  | 4.574252    | 3.305868   |
| E TOT (conf 2) (kcal)                                 | 19.802521            | 19.802521 | 6.797422   | 5.378248   | 9.805970   | 8.171918   | 6.785148    | 5.327018   | 6.916906    | 5.446879   | 6.856785    | 5.695560  | -           | -          |
| E TOT average (kcal)                                  | 19.802521            | 19.802521 | 6.620706   | 5.201532   | 9.348400   | 7.714348   | 6.893572    | 5.435442   | 6.664324    | 5.194297   | 6.637517    | 5.476293  | 4.574252    | 3.305868   |
| E (Enant. <i>S</i> ) - E(Enant. <i>R</i> ) (kcal)     |                      | 0.000000  |            | -1.419174  |            | -1.634052  |             | -1.458130  |             | -1.470028  |             | -1.161224 |             | -1.268384  |
| S/R=Exp(-(E enant <i>S</i> - E enant <i>R</i> )/(RT)) |                      | 1.000000  |            | 13.680305  |            | 20.328841  |             | 14.698775  |             | 15.024691  |             | 8.503510  |             | 10.360557  |
| ee (%)                                                |                      | 0         |            | 86         |            | 91         |             | 87         |             | 88         |             | 79        |             | 82         |

| <b>DOWN-conformation</b>                              | Uncatalyzed reaction |           | Catalyst 3 |            | Catalyst 6 |            | Catalyst 12 |            | Catalyst 13 |            | Catalyst 14 |           | Catalyst 16 |            |
|-------------------------------------------------------|----------------------|-----------|------------|------------|------------|------------|-------------|------------|-------------|------------|-------------|-----------|-------------|------------|
|                                                       | <i>R</i>             | <i>S</i>  | <i>R</i>   | <i>S</i>   | <i>R</i>   | <i>S</i>   | <i>R</i>    | <i>S</i>   | <i>R</i>    | <i>S</i>   | <i>R</i>    | <i>S</i>  | <i>R</i>    | <i>S</i>   |
| E ABC (Conf 1) (Eh)                                   | -0.082218            | -0.082218 | -0.221474  | -0.221474  | -0.292463  | -0.292463  | -0.260208   | -0.260208  | -0.284203   | -0.284203  | -0.233714   | -0.233714 | -0.287569   | -0.287569  |
| E ABC (conf 2) (Eh)                                   | -0.082218            | -0.082218 | -0.222037  | -0.222037  | -0.293921  | -0.293921  | -0.259862   | -0.259862  | -0.285008   | -0.285008  | -0.234413   | -0.234413 | -           | -          |
| E (RIC) (Eh)                                          | -0.097484            | -0.097484 | -0.240563  | -0.241412  | -0.314765  | -0.314527  | -0.279668   | -0.280770  | -0.305645   | -0.305294  | -0.246208   | -0.245187 | -0.309844   | -0.309401  |
| E (TS) (Eh)                                           | -0.050661            | -0.050661 | -0.212279  | -0.213950  | -0.278620  | -0.279165  | -0.250119   | -0.251812  | -0.275304   | -0.276931  | -0.224423   | -0.226119 | -0.279021   | -0.280549  |
| E (PIC ) (Eh)                                         | -0.138578            | -0.138578 | -0.261901  | -0.266899  | -0.330338  | -0.335628  | -0.300139   | -0.300139  | -0.324979   | -0.330173  | -0.269371   | -0.278239 | -0.330763   | -0.338027  |
| E (ABC) - E (RIC) (conf 1) (Eh)                       | -0.015266            | -0.015266 | -0.019089  | -0.019938  | -0.022302  | -0.022063  | -0.019459   | -0.020562  | -0.021442   | -0.021091  | -0.012494   | -0.011473 | -0.022276   | -0.021832  |
| E (ABC) - E (RIC) (conf 2) (Eh)                       | -0.015266            | -0.015266 | -0.018526  | -0.019375  | -0.020843  | -0.020605  | -0.019805   | -0.020907  | -0.020637   | -0.020286  | -0.011795   | -0.010774 | -           | -          |
| E (ABC) - E (RIC) (conf 1) (kcal)                     | -9.579515            | -9.579515 | -11.978714 | -12.511463 | -13.994411 | -13.845001 | -12.210993  | -12.902765 | -13.455274  | -13.234679 | -7.840010   | -7.199166 | -13.978127  | -13.700071 |
| E (ABC) - E (RIC) (conf 2) (kcal)                     | -9.579515            | -9.579515 | -11.625282 | -12.158031 | -13.079270 | -12.929861 | -12.427841  | -13.119613 | -12.950110  | -12.729516 | -7.401475   | -6.760631 | -           | -          |
| E (RIC) - E (TS) (Eh)                                 | 0.046823             | 0.046823  | 0.028284   | 0.027462   | 0.036145   | 0.035361   | 0.029549    | 0.028958   | 0.030341    | 0.028363   | 0.021785    | 0.019068  | 0.030824    | 0.028852   |
| E (RIC) - E (TS) (kcal)                               | 29.382036            | 29.382036 | 17.748722  | 17.232828  | 22.681325  | 22.189440  | 18.542257   | 18.171199  | 19.039439   | 17.798057  | 13.670422   | 11.965204 | 19.342143   | 18.104965  |
| E TOT (conf 1) (kcal)                                 | 19.802521            | 19.802521 | 5.770008   | 4.721365   | 8.686915   | 8.344439   | 6.331265    | 5.268434   | 5.584165    | 4.563377   | 5.830412    | 4.766038  | 5.364016    | 4.404894   |
| E TOT (conf 2) (kcal)                                 | 19.802521            | 19.802521 | 6.123440   | 5.074797   | 9.602055   | 9.259579   | 6.114416    | 5.051586   | 6.089329    | 5.068541   | 6.268947    | 5.204572  | -           | -          |
| E TOT average (kcal)                                  | 19.802521            | 19.802521 | 5.946724   | 4.898081   | 9.144485   | 8.802009   | 6.222840    | 5.160010   | 5.836747    | 4.815959   | 6.049679    | 4.985305  | 5.364016    | 4.404894   |
| E (Enant. <i>S</i> ) - E(Enant. <i>R</i> ) (kcal)     |                      | 0.000000  |            | -1.048643  |            | -0.342476  |             | -1.062831  |             | -1.020788  |             | -1.064374 |             | -0.959122  |
| S/R=Exp(-(E enant <i>S</i> - E enant <i>R</i> )/(RT)) |                      | 1.000000  |            | 6.909921   |            | 1.880022   |             | 7.093018   |             | 6.564084   |             | 7.113229  |             | 5.858805   |
| ee (%)                                                |                      | 0         |            | 75         |            | 31         |             | 75         |             | 74         |             | 75        |             | 71         |

|                | Uncatalyzed reaction |   | Catalyst 3 |    | Catalyst 6 |    | Catalyst 12 |    | Catalyst 13 |    | Catalyst 14 |    | Catalyst 16 |    |
|----------------|----------------------|---|------------|----|------------|----|-------------|----|-------------|----|-------------|----|-------------|----|
| ee average (%) |                      | 0 |            | 81 |            | 61 |             | 81 |             | 81 |             | 77 |             | 77 |





### 3. Synthetic procedures and characterization

#### Synthesis of imine 1

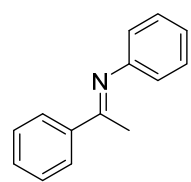**1**

The product was synthesized according to the general procedure 3.2.

Yield: 70%.

Spectral data is in agreement with the reported literature.

**<sup>1</sup>H-NMR** (500 MHz, CDCl<sub>3</sub>): δ 2.25 (s, 3H), 6.78–6.84 (m, 2H), 7.06–7.12 (m, 1H), 7.33–7.38 (m, 2H), 7.42–7.50 (m, 3H), 7.96–8.01 (m, 2H).

**<sup>13</sup>C-NMR** (125 MHz, CDCl<sub>3</sub>): δ 17.5, 119.5, 123.3, 127.3, 128.5, 129.1, 130.6, 139.6, 151.8, 165.5.

**Melting point:** 41–42 °C.

#### Synthesis of pivaloyl-L-proline

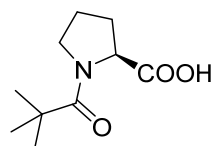

The product was synthesized according to the general procedure 3.3.

Yield: 65%.

Spectral data is in agreement with the reported literature.

##### Piv-L-proline

**<sup>1</sup>H-NMR** (500 MHz, CDCl<sub>3</sub>): δ 1.26 (s, 9H), 1.89–2.00 (m, 1H), 2.01–2.09 (m, 2H), 2.09–2.15 (m, 1H), 3.65–3.78 (m, 2H), 4.50–4.60 (m, 1H), 11.36 (bs, 1H).

**<sup>13</sup>C-NMR** (125 MHz, CDCl<sub>3</sub>): δ 26.0, 27.2, 27.3, 39.1, 48.5, 61.6, 175.7, 178.6.

**Melting point:** 128–130 °C.

#### Synthesis of catalyst 3

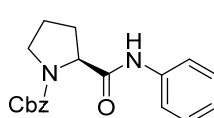**3**

According to the general procedure 3.4., Cbz-L-proline (1 g, 4.012 mmol), triethylamine (0.562 mL, 4.012 mmol), ethyl chloroformate (0.395 mL, 4.012 mmol) and aniline (0.746 mL, 4.012 mmol) afforded **3** as a white solid (yield 62%). Purification by crystallization in CH<sub>2</sub>Cl<sub>2</sub>/*n*-hexane.

**<sup>1</sup>H-NMR** (500 MHz, CDCl<sub>3</sub>): δ 1.81–2.69 (m, 4H), 3.37–3.73 (m, 2H), 4.51 (s, 1H), 4.99–5.35 (m, 2H), 6.99–7.59 (m, 10H), 7.66 y 9.15 (s, 1H).

**<sup>13</sup>C-NMR** (125 MHz, CDCl<sub>3</sub>): δ 24.7, 27.7, 47.2, 61.2, 67.7, 119.9, 124.1, 128.0, 128.3, 128.7, 128.9, 136.4, 138.3, 156.8, 169.5.

**IR (ATR):**  $\nu_{\max}$  (cm<sup>-1</sup>) 1425, 1441, 1466, 1494, 1550, 1602, 1665, 1698, 2882, 3088, 3136, 3199, 3240, 3276, 3310.

**ESI-MS** (CH<sub>3</sub>OH): m/z calcd for C<sub>19</sub>H<sub>20</sub>N<sub>2</sub>O<sub>3</sub> 325.1552 [M+H<sup>+</sup>], found 325.1549.

**Melting point:** 134–138 °C.

**[ $\alpha$ ]<sup>25</sup><sub>D</sub>** (CH<sub>2</sub>Cl<sub>2</sub>): -118.66.

#### Synthesis of catalyst 4

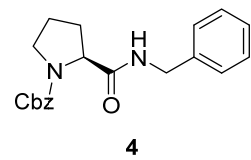

According to the general procedure 3.4., Cbz-L-proline (1 g, 4.012 mmol), triethylamine (0.562 mL, 4.012 mmol), ethyl chloroformate (0.395 mL, 4.012 mmol) and benzylamine (0.443 mL, 4.012 mmol) afforded **4** as a white solid (yield 62%). Purification by crystallization in IPA.

**<sup>1</sup>H-NMR** (500 MHz, CDCl<sub>3</sub>):  $\delta$  1.94 (d, J = 30.7 Hz, 2H), 2.21 (t, J = 26.2 Hz, 1H), 2.30–2.50 (m, 1H), 3.49 (d, J = 27.8 Hz, 2H), 4.39 (s, 3H), 5.13 (s, 2H), 6.24 and 7.04 (s, 1H), 7.08–7.49 (m, 10H).

**<sup>13</sup>C-NMR** (125 MHz, CDCl<sub>3</sub>):  $\delta$  24.8, 28.6, 43.6, 47.3, 60.9, 67.5, 127.5, 127.6, 128.1, 128.3, 128.7, 128.8, 136.5, 138.3, 156.4, 171.7.

**IR (ATR):**  $\nu_{\max}$  (cm<sup>-1</sup>) 1415, 1440, 1452, 1497, 1534, 1651, 1693, 1714, 2871, 2907, 2958, 2993, 3030, 3287.

**ESI-MS** (CH<sub>3</sub>OH): m/z calcd for C<sub>20</sub>H<sub>22</sub>N<sub>2</sub>O<sub>3</sub> 339.17 [M+H<sup>+</sup>], found 339.3.

**Melting point:** 90–95 °C.

**[ $\alpha$ ]<sup>25</sup><sub>D</sub>** (CH<sub>2</sub>Cl<sub>2</sub>): -82.48.

#### Synthesis of catalyst 5

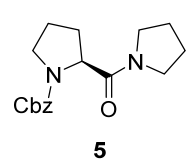

According to the general procedure 3.4., Cbz-L-proline (5 g, 20.06 mmol), triethylamine (2.809 g, 20.06 mmol), ethyl chloroformate (1.977 mL, 20.06 mmol) and pyrrolidine (1.659 mL, 20.06 mmol) afforded **5** as a white solid (yield 36%). Purification by crystallization in CH<sub>2</sub>Cl<sub>2</sub>/H<sub>2</sub>O.

**<sup>1</sup>H-NMR** (500 MHz, CDCl<sub>3</sub>):  $\delta$  1.54–1.68 (m, 1H), 1.69–2.05 (m, 5H), 2.07–2.21 (m, 2H), 3.22–3.45 (m, 3H), 3.45–3.81 (m, 3H), 4.36–4.57 (m, 1H), 4.94–5.23 (m, 2H), 7.23–7.40 (m, 5H).

**<sup>13</sup>C-NMR** (125 MHz, CDCl<sub>3</sub>):  $\delta$  23.9, 26.4, 29.7, 46.1, 46.1, 58.3, 66.9, 127.9, 128.2, 128.5, 137.0, 155.0, 170.9.

**IR (ATR):**  $\nu_{\max}$  (cm<sup>-1</sup>) 1415, 1439, 1469, 1639, 1700, 2877, 2952, 2973.

**ESI-MS** (CH<sub>3</sub>OH): m/z calcd for C<sub>17</sub>H<sub>22</sub>N<sub>2</sub>O<sub>3</sub> 303.1709 [M+H<sup>+</sup>], found 303.1709.

**Melting point:** 133–134 °C.

**[ $\alpha$ ]<sup>25</sup><sub>D</sub>** (CH<sub>2</sub>Cl<sub>2</sub>): -2.18.

### Synthesis of catalyst 6

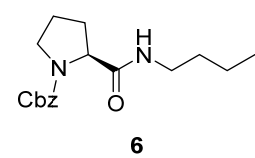

According to the general procedure 3.4., Cbz-L-proline (4 g, 16.047 mmol), triethylamine (2.247 mL, 16.047 mmol), ethyl chloroformate (1.582 mL, 16.047 mmol) and butylamine (1.586 mL, 16.047 mmol) afforded **6** as a white solid (yield 80%). Purification by crystallization in CH<sub>2</sub>Cl<sub>2</sub>/*n*-hexane.

**<sup>1</sup>H-NMR** (500 MHz, CDCl<sub>3</sub>): δ 0.77-0.95 (m, 3H), 1.12-1.36 (m, 3H), 1.36-1.50 (m, 1H), 1.78-2.02 (m, 2H), 2.04-2.23 (m, 1H), 2.25-2.43 (s, 1H), 3.07-3.28 (m, 2H), 3.33-3.60 (m, 2H), 4.29 (s, 1H), 4.99-5.24 (m, 2H), 5.94 y 6.70 (s, 1H), 7.27-7.45 (m, 5H).

**<sup>13</sup>C-NMR** (125 MHz, CDCl<sub>3</sub>): δ 13.75, 20.05, 24.62, 28.30, 31.60, 39.23, 47.11, 60.71, 67.35, 128.03, 128.19, 128.57, 136.49, 156.28, 171.57.

**IR (ATR):** ν<sub>max</sub> (cm<sup>-1</sup>) 1418, 1459, 1550, 1648, 1693, 1713, 2873, 2934, 2962, 3303.

**ESI-MS** (CH<sub>3</sub>OH): m/z calcd for C<sub>17</sub>H<sub>24</sub>N<sub>2</sub>O<sub>3</sub> 305.18 [M+H<sup>+</sup>], found 305.2.

**Melting point:** 85-86 °C.

**[α]<sup>25</sup><sub>D</sub>** (CH<sub>2</sub>Cl<sub>2</sub>): -78.50.

### Synthesis of catalyst 7

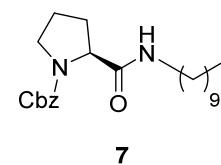

According to the general procedure 3.4., Cbz-L-proline (6 g, 24.071 mmol), triethylamine (3.370 mL, 24.071 mmol), ethyl chloroformate (2.373 mL, 24.071 mmol) and decylamine (5.064 mL, 24.071 mmol) afforded **7** as a white solid (yield 54%). Purification by crystallization in CH<sub>2</sub>Cl<sub>2</sub>/*n*-hexane.

**<sup>1</sup>H-NMR** (500 MHz, CDCl<sub>3</sub>): δ 0.88 (t, J = 6.8 Hz, 3H), 1.12-1.53 (m, 16H), 1.79-2.04 (m, 2H), 2.05-2.26 (m, 1H), 2.27-2.48 (m, 1H), 3.07-3.30 (m, 2H), 3.37-3.62 (m, 2H), 4.32 (d, J = 5.6 Hz, 1H), 5.04-5.24 (m, 2H), 5.88 y 6.68 (s, 1H), 7.27-7.42 (m, 5H).

**<sup>13</sup>C-NMR** (125 MHz, CDCl<sub>3</sub>): δ 14.2, 22.8, 23.9, 24.7, 26.9, 29.4, 29.5, 29.6, 29.7 (2C), 32.0, 39.6, 47.2, 60.8, 67.5, 128.1, 128.3, 128.7, 136.5, 156.4, 171.5.

**IR (ATR):** ν<sub>max</sub> (cm<sup>-1</sup>) 1417, 1459, 1558, 1651, 1693, 1712, 2851, 2918, 2955, 3303.

**ESI-MS** (CH<sub>3</sub>OH): m/z calcd for C<sub>23</sub>H<sub>36</sub>N<sub>2</sub>O<sub>3</sub> 389.28 [M+H<sup>+</sup>], found 389.4.

**Melting point:** 87-90 °C.

**[α]<sup>25</sup><sub>D</sub>** (CH<sub>2</sub>Cl<sub>2</sub>): -60.76.

### Synthesis of catalyst 8

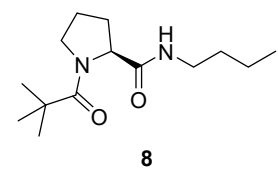

According to the general procedure 3.4., Piv-L-proline (3 g, 15.056 mmol), triethylamine (2.108 mL, 15.056 mmol), ethyl chloroformate (1.484 mL, 15.056 mmol) and butylamine (1.496 mL, 15.056 mmol) afforded **8** as a white solid (yield 50%). Purification by crystallization in *n*-hexane.

**<sup>1</sup>H-NMR** (500 MHz, CDCl<sub>3</sub>): δ 0.88 (t, J = 7.3 Hz, 3H), 1.25 (s, 9H), 1.27–1.34 (m, 2H), 1.37–1.47 (m, 2H), 1.76–1.85 (m, 1H), 1.86–1.95 (m, 1H), 2.02–2.16 (m, 1H), 2.24–2.29 (m, 1H), 3.12–3.26 (m, 2H), 3.62 (ddd, J = 10.2, 7.8, 4.8 Hz, 1H), 3.70 (dt, J = 10.0, 7.4 Hz, 1H), 4.60 (dd, J = 8.1, 3.1 Hz, 1H), 6.72 (s, 1H).

**<sup>13</sup>C-NMR** (125 MHz, CDCl<sub>3</sub>): δ 13.8, 20.1, 25.9, 26.6, 27.7, 31.7, 39.2, 39.4, 48.4, 61.7, 171.9, 177.9.

**IR (ATR):** ν<sub>max</sub> (cm<sup>−1</sup>) 1418, 1478, 1552, 1601, 1686, 2859, 2874, 2934, 2958, 3307.

**ESI-MS** (CH<sub>3</sub>OH): m/z calcd for C<sub>14</sub>H<sub>26</sub>N<sub>2</sub>O<sub>2</sub> 255.20 [M+H<sup>+</sup>], found 255.3.

**Melting point:** 57–60 °C.

**[α]<sup>25</sup><sub>D</sub>** (CH<sub>2</sub>Cl<sub>2</sub>): −105.68.

### Synthesis of catalyst 9

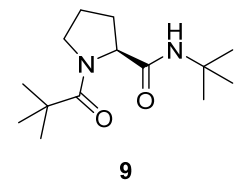

According to the general procedure 3.4., Piv-L-proline (1 g, 5.019 mmol), triethylamine (0.703 mL, 5.019 mmol), ethyl chloroformate (0.495 mL, 5.019 mmol) and *tert*-butylamine (0.538 mL, 5.019 mmol) afforded **9** as a white solid (yield 30%). No purification was needed.

**<sup>1</sup>H-NMR** (500 MHz, CDCl<sub>3</sub>): δ 1.21 (s, 9H), 1.25 (s, 9H), 1.72–1.79 (m, 1H), 1.80–1.88 (m, 1H), 1.99–2.07 (m, 1H), 2.15–2.21 (m, 1H), 3.54–3.61 (m, 1H), 3.66 (dt, J = 10.1, 7.3 Hz, 1H), 4.49 (dd, J = 8.2, 3.1 Hz, 1H), 6.49 (s, 1H).

**<sup>13</sup>C-NMR** (125 MHz, CDCl<sub>3</sub>): δ 25.7, 26.6, 27.6, 28.7, 39.3, 48.3, 50.9, 62.2, 171.1, 177.7.

**IR (ATR):** ν<sub>max</sub> (cm<sup>−1</sup>) 1417, 1454, 1478, 1509, 1552, 1585, 1684, 2879, 2933, 2941, 2960, 2988, 3069, 3235, 3291.

**ESI-MS** (CH<sub>3</sub>OH): m/z calcd for C<sub>14</sub>H<sub>26</sub>N<sub>2</sub>O<sub>2</sub> 255.20 [M+H<sup>+</sup>], found 255.30.

**Melting point:** 96–98 °C.

**[α]<sup>25</sup><sub>D</sub>** (CH<sub>2</sub>Cl<sub>2</sub>): −117.44.

### Synthesis of catalyst 10

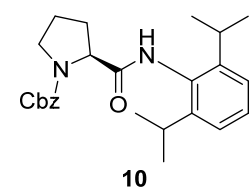

According to the general procedure 3.4., Cbz-L-proline (1 g, 4.012 mmol), triethylamine (0.562 mL, 4.012 mmol), ethyl chloroformate (0.395 mL, 4.012 mmol) and 2,6-diisopropylaniline (0.780 mL, 4.012 mmol) afforded **10** as a beige solid (yield 52%). Purification by crystallization in CH<sub>2</sub>Cl<sub>2</sub>/*n*-hexane.

**<sup>1</sup>H-NMR** (500 MHz, CDCl<sub>3</sub>): δ 1.12 (s, 12H), 1.99 (m, 3H), 2.38 (m, 1H), 2.97 (s, 2H), 3.55 (s, 2H), 4.61 (d, J = 5.2 Hz, 1H), 4.88-5.50 (m, 2H), 7.12 (d, J = 7.7 Hz, 2H), 7.22-7.27 (m, 1H), 7.28-7.39 (m, 5H), 8.10 (s, 1H).

**<sup>13</sup>C-NMR** (125 MHz, CDCl<sub>3</sub>): δ 23.6, 24.9, 28.1, 28.9, 47.3, 60.9, 67.8, 123.5, 128.0, 128.4, 128.8, 131.4, 136.4, 146.3, 156.8, 170.9.

**IR (ATR):** ν<sub>max</sub> (cm<sup>-1</sup>) 1412, 1445, 1523, 1658, 1677, 1704, 2869, 2960, 3239.

**ESI-MS** (CH<sub>3</sub>OH): m/z calcd for C<sub>25</sub>H<sub>32</sub>N<sub>2</sub>O<sub>3</sub> 409.2491 [M+H<sup>+</sup>], found 409.2499.

**Melting point:** 110-112 °C.

**[α]<sub>D</sub><sup>25</sup>** (CH<sub>2</sub>Cl<sub>2</sub>): -107.66.

### Synthesis of catalyst 11

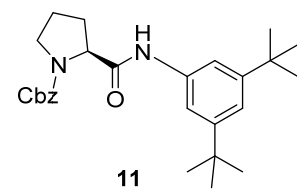

According to the general procedure 3.4., Cbz-L-proline (0.5 g, 2.006 mmol), triethylamine (0.280 mL, 2.006 mmol), ethyl chloroformate (0.198 mL, 2.006 mmol) and 3,5-di-*tert*-butylaniline (0.412 g, 2.006 mmol) afforded **11** as a white solid (yield 33%). Purification by crystallization in CH<sub>2</sub>Cl<sub>2</sub>/*n*-hexane.

**<sup>1</sup>H-NMR** (500 MHz, CDCl<sub>3</sub>): δ 1.32 (s, 18H), 1.86-1.99 (m, 1H), 2.00-2.15 (m, 1H), 2.16-2.39 (m, 1H), 2.45-2.62 (m, 1H), 3.38-3.75 (m, 2H), 4.52 (s, 1H), 5.21 (s, 2H), 7.13-7.46 (m, 8H), 7.68 and 9.05 (s, 1H).

**<sup>13</sup>C-NMR** (125 MHz, CDCl<sub>3</sub>): δ 24.8, 27.6, 31.5, 35.0, 47.2, 61.3, 67.7, 114.5, 118.4, 127.9, 128.3, 128.7, 136.4, 151.67, 156.9, 169.3.

**IR (ATR):** ν<sub>max</sub> (cm<sup>-1</sup>) 1412, 1446, 1562, 1604, 1614, 1664, 1711, 2868, 2902, 2958, 3267.

**ESI-MS** (CH<sub>3</sub>OH): m/z calcd for C<sub>27</sub>H<sub>36</sub>N<sub>2</sub>O<sub>3</sub> 437.2804 [M+H<sup>+</sup>], found 437.2797.

**Melting point:** 165-167 °C.

**[α]<sub>D</sub><sup>25</sup>** (CH<sub>2</sub>Cl<sub>2</sub>): -86.60.

### Synthesis of catalyst 12

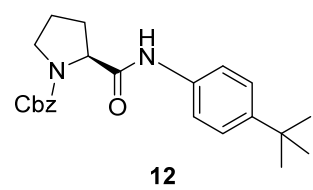

According to the general procedure 3.4., Cbz-L-proline (1 g, 4.012 mmol), triethylamine (0.562 mL, 4.012 mmol), ethyl chloroformate (0.395 mL, 4.012 mmol) and 4-*tert*-butylaniline (0.645 mL, 4.012 mmol) afforded **12** as a yellow solid (yield 56%). No purification was needed.

**<sup>1</sup>H-NMR** (500 MHz, CDCl<sub>3</sub>): 1.31 (s, 9H), 1.76–2.60 (m, 4H), 3.36–3.71 (m, 2H), 4.51 (s, 1H), 5.02–5.33 (m, 2H), 7.06–7.58 (m, 9H), 7.75 and 9.09 (s, 1H).

**<sup>13</sup>C-NMR** (125 MHz, CDCl<sub>3</sub>): δ 24.8, 27.7, 31.5, 34.4, 47.2, 61.2, 67.7, 119.7, 125.7, 125.9, 128.0, 128.3,

128.7, 135.6, 136.4, 156.9, 169.4.

**IR (ATR):** ν<sub>max</sub> (cm<sup>−1</sup>) 1410, 1446, 1519, 1535, 1604, 1671, 1696, 2872, 2901, 2959, 3307.

**ESI-MS** (CH<sub>3</sub>OH): m/z calcd for C<sub>23</sub>H<sub>28</sub>N<sub>2</sub>O<sub>3</sub> 381.2178 [M+H<sup>+</sup>], found 381.2178.

**Melting point:** 48–52 °C.

**[α]<sub>D</sub><sup>25</sup>** (CH<sub>2</sub>Cl<sub>2</sub>): −109.64.

### Synthesis of catalyst 13

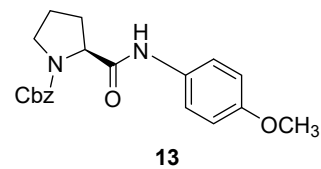

According to the general procedure 3.4., Cbz-L-proline (6 g, 24.071 mmol), triethylamine (3.370 mL, 24.071 mmol), ethyl chloroformate (2.373 mL, 24.071 mmol) and 4-methoxyaniline (2.995 g, 24.071 mmol) afforded **13** as a purple solid (yield 63%). Purification by crystallization in CH<sub>2</sub>Cl<sub>2</sub>/*n*-hexane.

**<sup>1</sup>H-NMR** (500 MHz, CDCl<sub>3</sub>): δ 1.80–2.58 (m, 4H), 3.37–3.66 (m, 2H), 3.77 (s, 3H), 4.48 (s, 1H), 4.94–5.34 (m, 2H), 6.80 (d, J = 8.7 Hz, 2H), 7.11–7.55 (m, 7H), 7.70 and 9.01 (s, 1H).

**<sup>13</sup>C-NMR** (125 MHz, CDCl<sub>3</sub>): δ 24.8, 27.9, 47.2, 55.6, 61.1, 67.6, 114.1, 121.5, 128.0, 128.3, 128.7, 130.5, 131.5, 136.4, 156.3, 169.3.

**IR (ATR):** ν<sub>max</sub> (cm<sup>−1</sup>) 1413, 1446, 1509, 1535, 1658, 1699, 1714, 1736, 1782, 1814, 2885, 2949, 2973, 3289.

**ESI-MS** (CH<sub>3</sub>OH): m/z calcd for C<sub>20</sub>H<sub>22</sub>N<sub>2</sub>O<sub>4</sub> 355.16 [M+H<sup>+</sup>], found 355.2.

**Melting point:** 122–124 °C.

**[α]<sub>D</sub><sup>25</sup>** (CH<sub>2</sub>Cl<sub>2</sub>): −123.90.

### Synthesis of catalyst 14

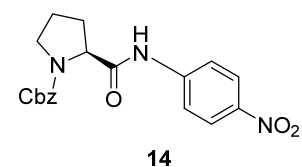

According to the general procedure 3.4., Cbz-L-proline (1 g, 4.012 mmol), triethylamine (0.562 mL, 4.012 mmol), ethyl chloroformate (0.395 mL, 4.012 mmol) and 4-nitroaniline (0.559 g, 4.012 mmol) afforded **14** as a yellow solid (yield 31%). Purification by crystallization in IPA.

**<sup>1</sup>H-NMR** (500 MHz, CDCl<sub>3</sub>): δ 1.89-2.14 (m, 3H), 2.31-2.46 (m, 1H), 3.44-3.57 (s, 1H), 3.58-3.67 (m, 1H), 4.53 (s, 1H), 5.14-5.31 (m, 2H), 7.26-7.44 (m, 5H), 7.50 (d, J = 8.2 Hz, 2H), 8.00 (d, J = 7.4 Hz, 2H), 8.16 and 9.88 (s, 1H).

**<sup>13</sup>C-NMR** (125 MHz, CDCl<sub>3</sub>): δ 24.7, 28.2, 47.4, 61.3, 67.9, 119.1, 124.8, 127.9, 128.5, 128.7, 136.2, 143.3, 144.2, 156.9, 170.5.

**IR (ATR):** ν<sub>max</sub> (cm<sup>-1</sup>) 1408, 1422, 1450, 1495, 1508, 1553, 1595, 1614, 1662, 1707, 2877, 2961, 3033, 3066, 3090, 3158, 3219, 3247, 3282.

**ESI-MS** (CH<sub>3</sub>OH): m/z calcd for C<sub>19</sub>H<sub>19</sub>N<sub>3</sub>O<sub>5</sub> 370.14 [M+H<sup>+</sup>], found 370.1.

**Melting point:** 162-164 °C.

**[α]<sup>25</sup><sub>D</sub>** (CH<sub>2</sub>Cl<sub>2</sub>): -106.02.

### Synthesis of catalyst 15

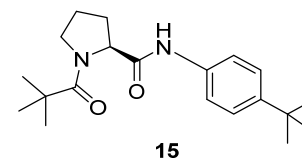

According to the general procedure 3.4., Piv-L-proline (3 g, 15.056 mmol), triethylamine (2.108 mL, 15.056 mmol), ethyl chloroformate (1.484 mL, 15.056 mmol) and 4-*tert*-butylaniline (2.421 mL, 15.056 mmol) afforded **15** as a white solid (yield 45%). Purification by crystallization in CH<sub>2</sub>Cl<sub>2</sub>/*n*-hexane.

**<sup>1</sup>H-NMR** (500 MHz, CDCl<sub>3</sub>): δ 1.26 (s, 9H), 1.30 (s, 9H), 1.83-2.01 (m, 2H), 2.13-2.25 (m, 1H), 2.29-2.38 (m, 1H), 3.66-3.81 (m, 2H), 4.81 (dd, J = 8.1, 3.2 Hz, 1H), 7.20-7.25 (m, 2H), 7.36-7.42 (m, 2H), 9.33 (s, 1H).

**<sup>13</sup>C-NMR** (125 MHz, CDCl<sub>3</sub>): δ 26.0, 26.5, 27.7, 31.5, 34.3, 39.3, 48.5, 62.5, 119.6, 125.5, 135.9, 146.6, 170.1, 178.3.

**IR (ATR):** ν<sub>max</sub> (cm<sup>-1</sup>) 1415, 1478, 1518, 1540, 1601, 1686, 2871, 2906, 2968, 3131, 3202, 3281, 3311.

**ESI-MS** (CH<sub>3</sub>OH): m/z calcd for C<sub>20</sub>H<sub>30</sub>N<sub>2</sub>O<sub>2</sub> 331.23 [M+H<sup>+</sup>], found 331.4.

**Melting point:** 132-134 °C.

**[α]<sup>25</sup><sub>D</sub>** (CH<sub>2</sub>Cl<sub>2</sub>): -102.26.



**Synthesis of catalyst 16**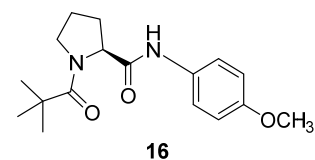

According to the general procedure 3.4., Piv-L-proline (3 g, 15.056 mmol), triethylamine (2.108 mL, 15.056 mmol), ethyl chloroformate (1.484 mL, 15.056 mmol) and 4-methoxyaniline (1.873 g, 15.056 mmol) afforded **16** as an orange solid (yield 44%). Purification by column chromatography (silica, CH<sub>2</sub>Cl<sub>2</sub>/CH<sub>3</sub>OH = 95/5).

**<sup>1</sup>H-NMR** (500 MHz, CDCl<sub>3</sub>): δ 1.28 (s, 9H), 1.83–1.99 (m, 2H), 2.11–2.23 (m, 1H), 2.23–2.32 (m, 1H), 3.66–3.78 (m, 5H), 4.75 (dd, J = 8.1, 3.4 Hz, 1H), 6.65–6.73 (m, 2H), 7.31–7.38 (m, 2H), 9.29 (s, 1H).

**<sup>13</sup>C-NMR** (125 MHz, CDCl<sub>3</sub>): δ 26.0, 26.7, 27.6, 39.3, 48.5, 55.5, 62.5, 113.9, 121.2, 131.9, 155.9, 170.1, 178.1.

**IR (ATR):** ν<sub>max</sub> (cm<sup>−1</sup>) 1402, 1415, 1436, 1448, 1459, 1479, 1512, 1523, 1546, 1597, 1625, 1671, 1740, 2841, 2884, 2908, 2919, 2935, 2972, 2979, 3358.

**ESI-MS** (CH<sub>3</sub>OH): m/z calcd for C<sub>17</sub>H<sub>24</sub>N<sub>2</sub>O<sub>3</sub> 305.18 [M+H<sup>+</sup>], found 305.3.

**Melting point:** 96–98 °C.

**[α]<sup>25</sup><sub>D</sub>** (CH<sub>2</sub>Cl<sub>2</sub>): −100.96.

4. NMR spectra

Catalyst 3

<sup>1</sup>H-NMR (500 MHz, CDCl<sub>3</sub>, rt)

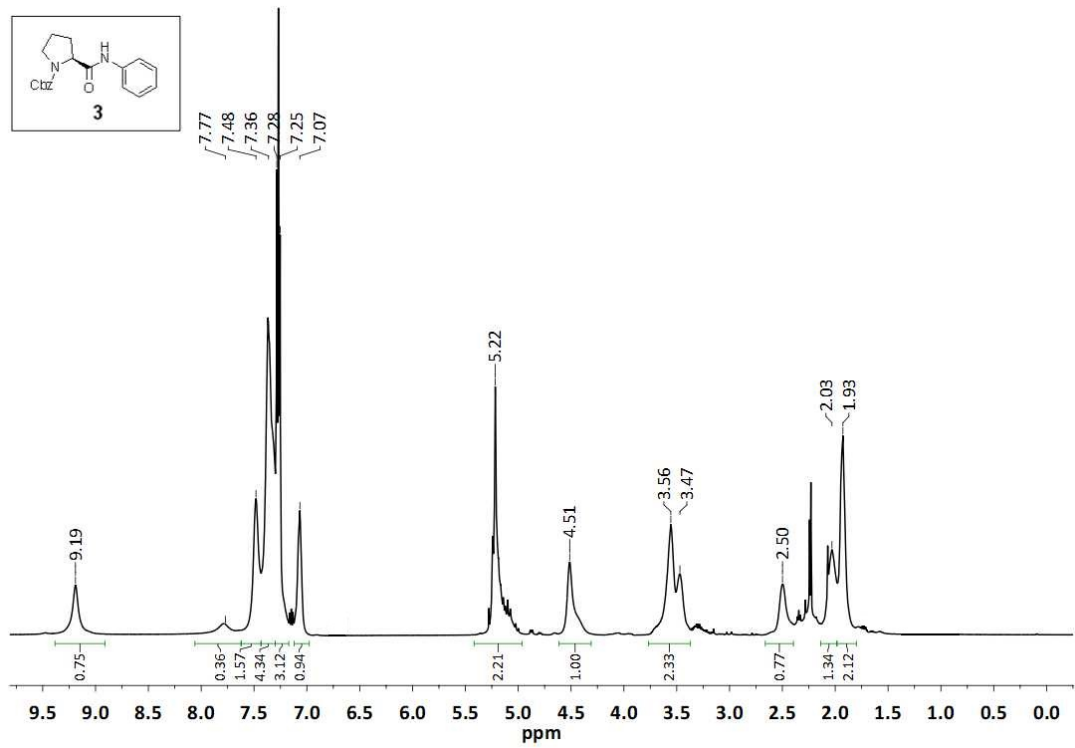

<sup>13</sup>C-NMR (125 MHz, CDCl<sub>3</sub>, rt)

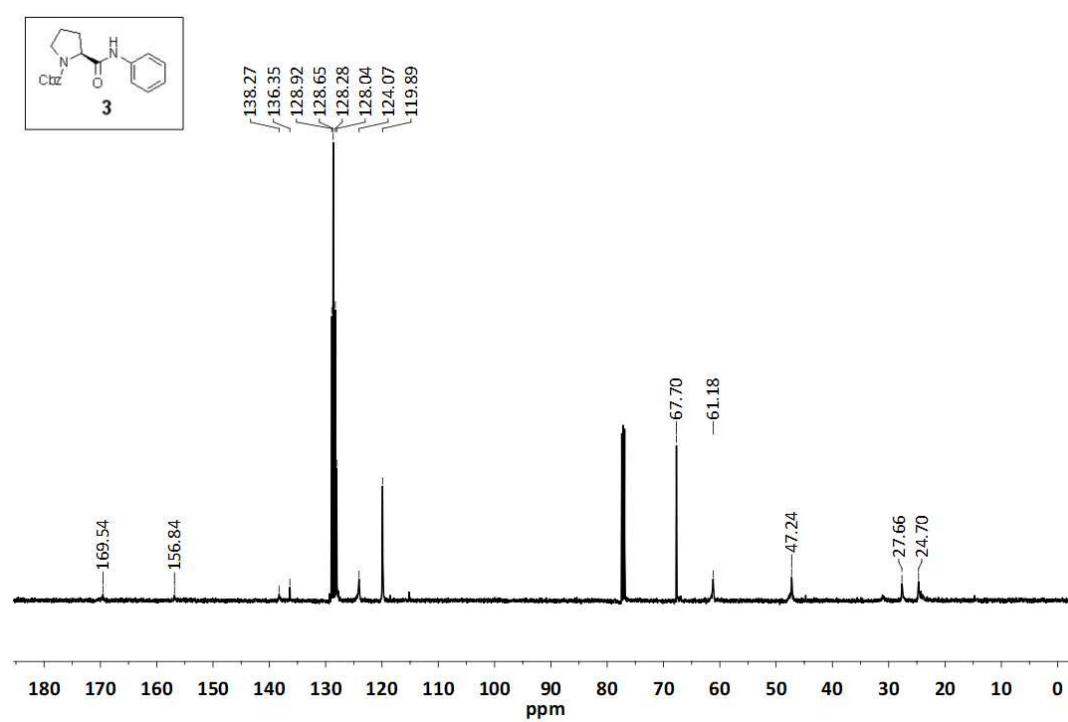

Catalyst 4

<sup>1</sup>H-NMR (500 MHz, CDCl<sub>3</sub>, rt)

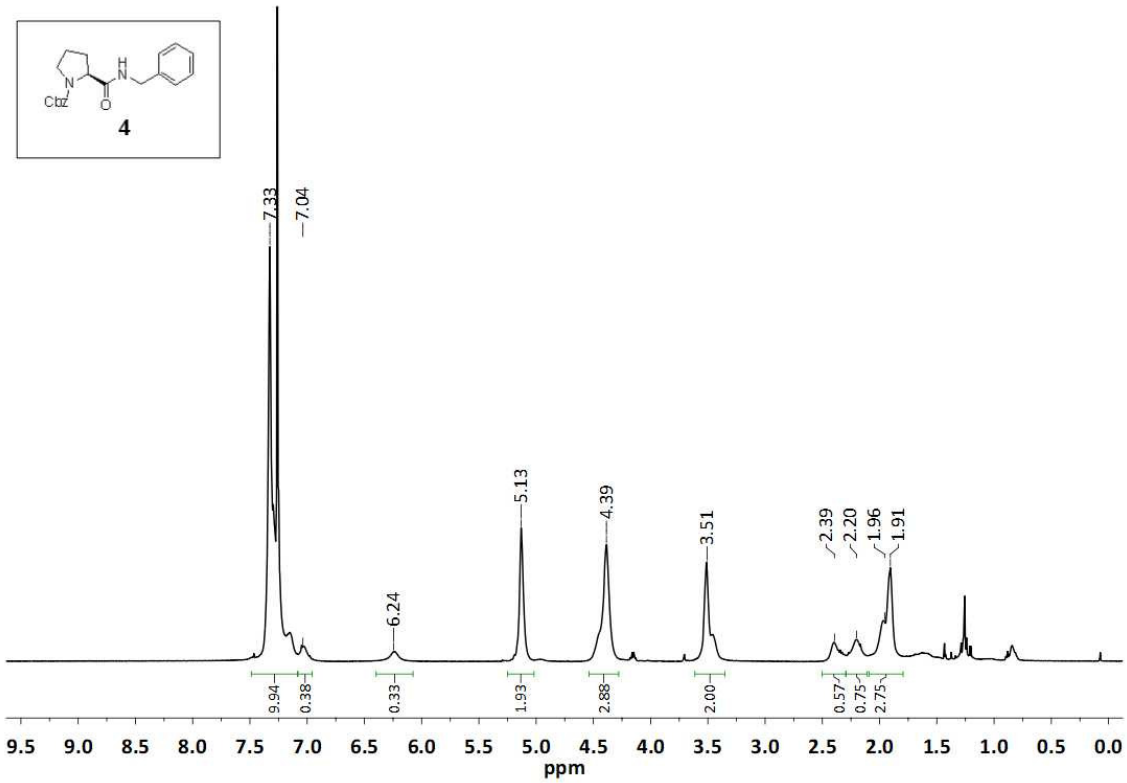

<sup>13</sup>C-NMR (125 MHz, CDCl<sub>3</sub>, rt)

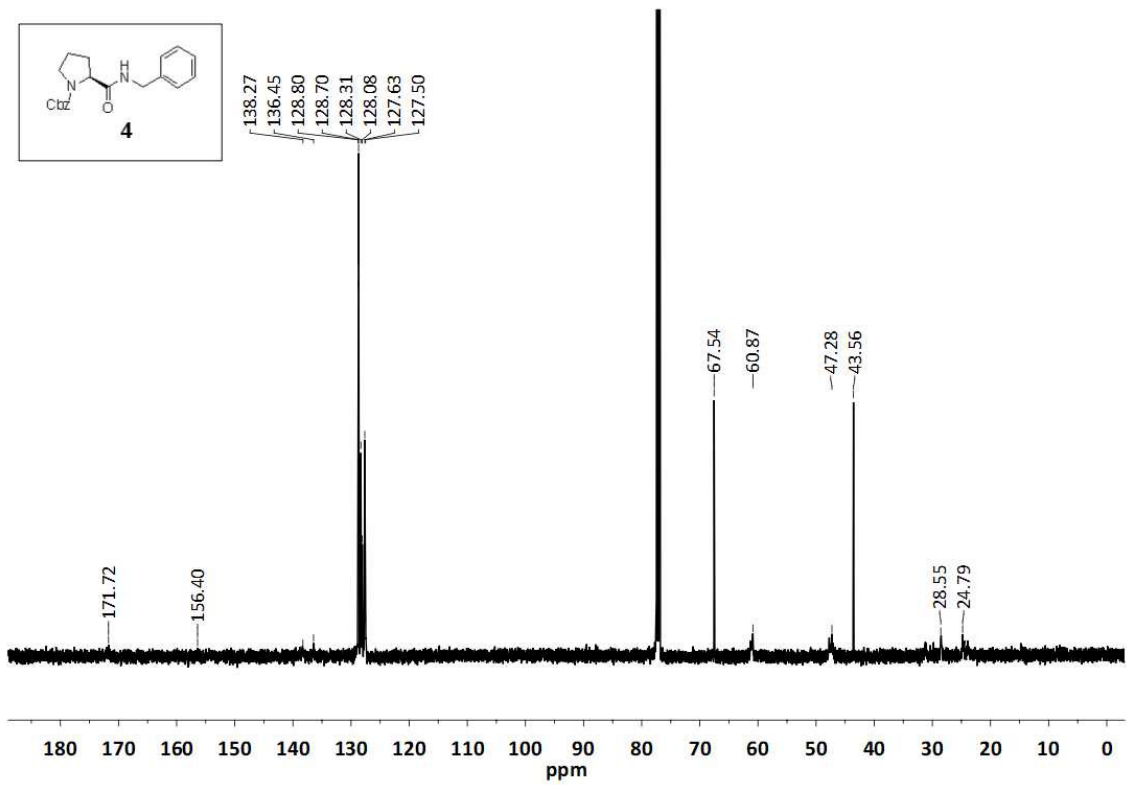

Catalyst 5

<sup>1</sup>H-NMR (500 MHz, CDCl<sub>3</sub>, rt)

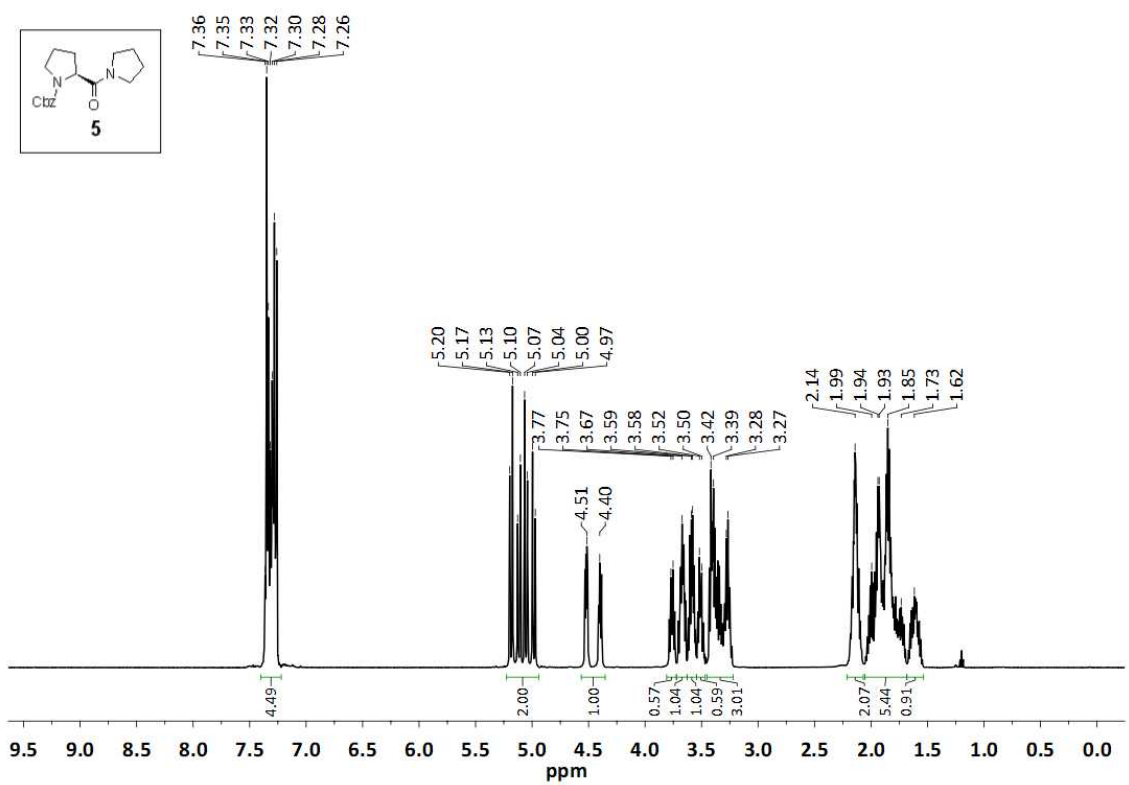

<sup>13</sup>C-NMR (125 MHz, CDCl<sub>3</sub>, rt)

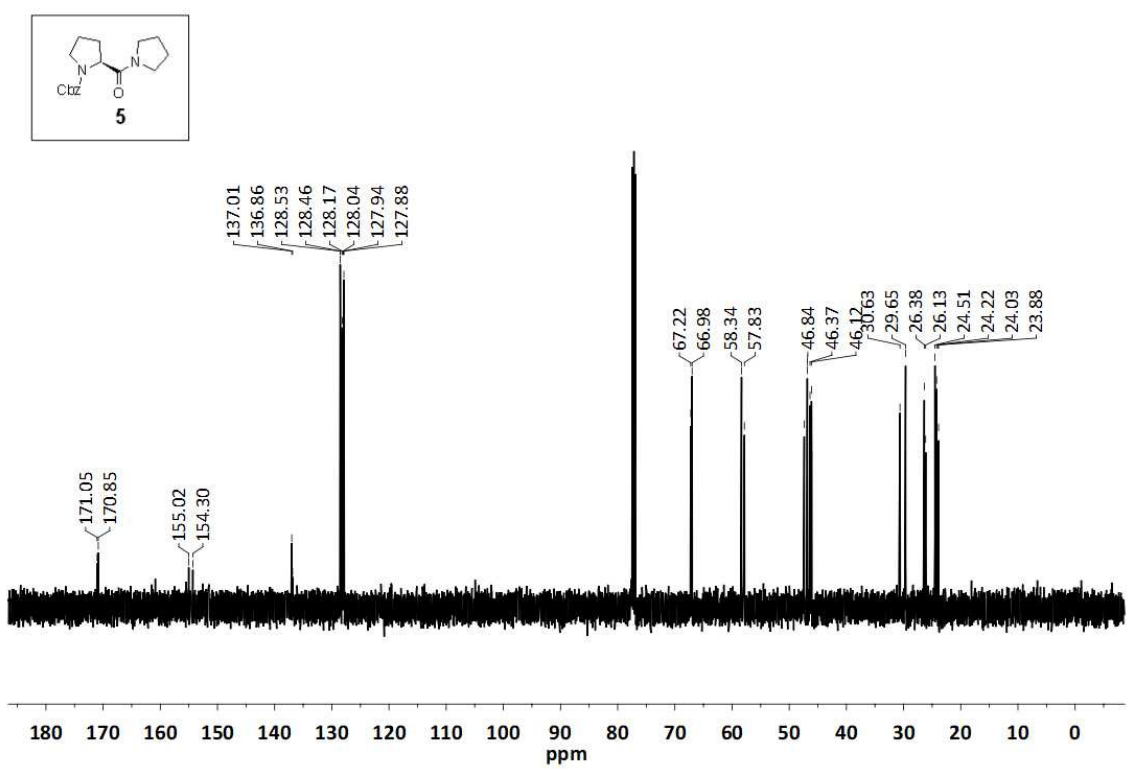

Catalyst 6

<sup>1</sup>H-NMR (500 MHz, CDCl<sub>3</sub>, rt)

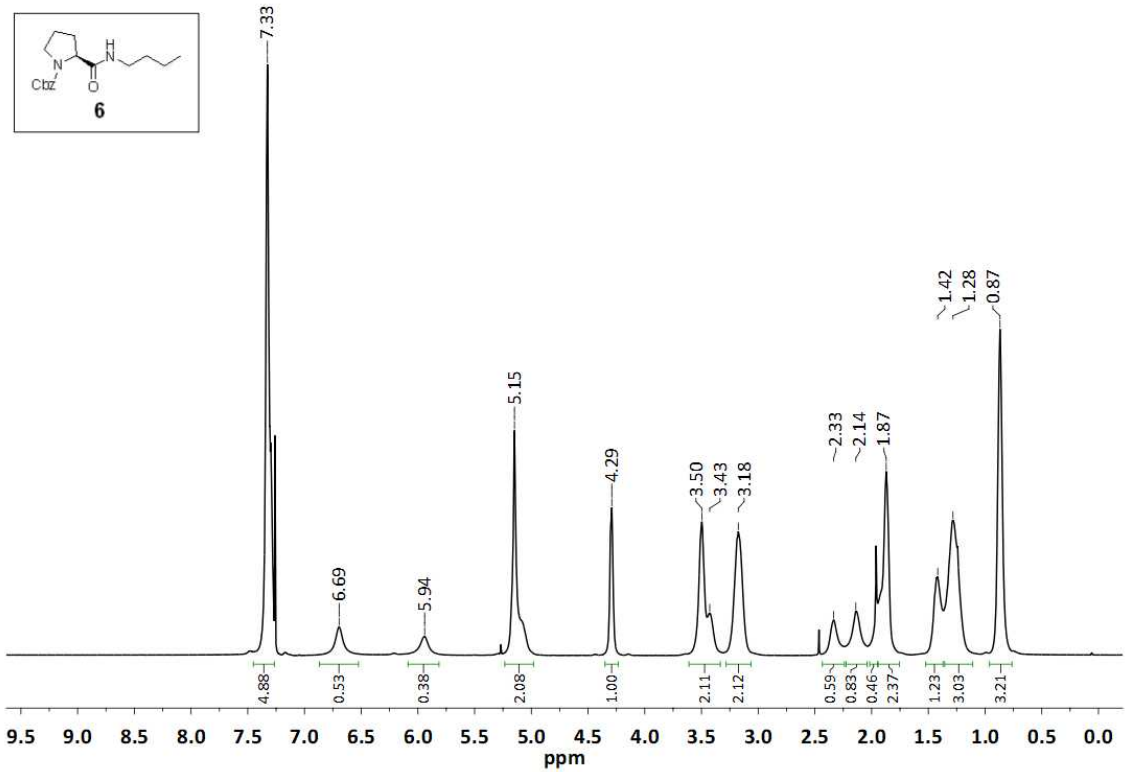

<sup>13</sup>C-NMR (125 MHz, CDCl<sub>3</sub>, rt)



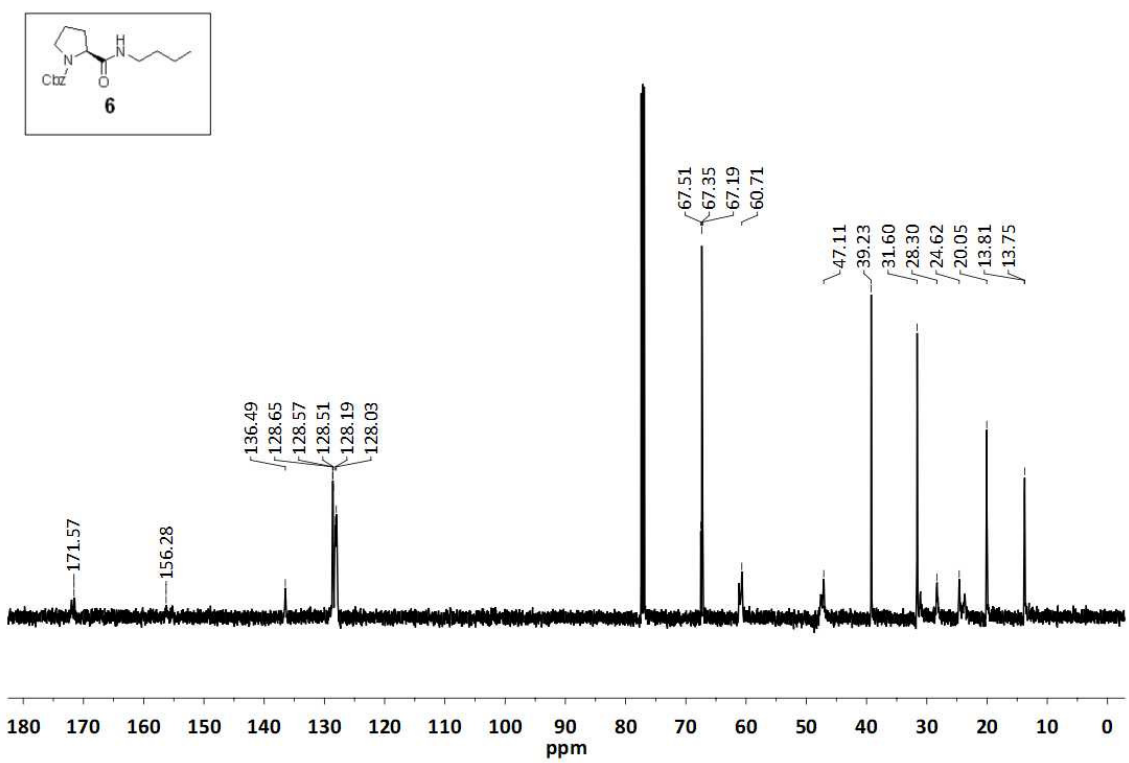

Catalyst 7

<sup>1</sup>H-NMR (500 MHz, CDCl<sub>3</sub>, rt)

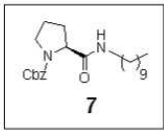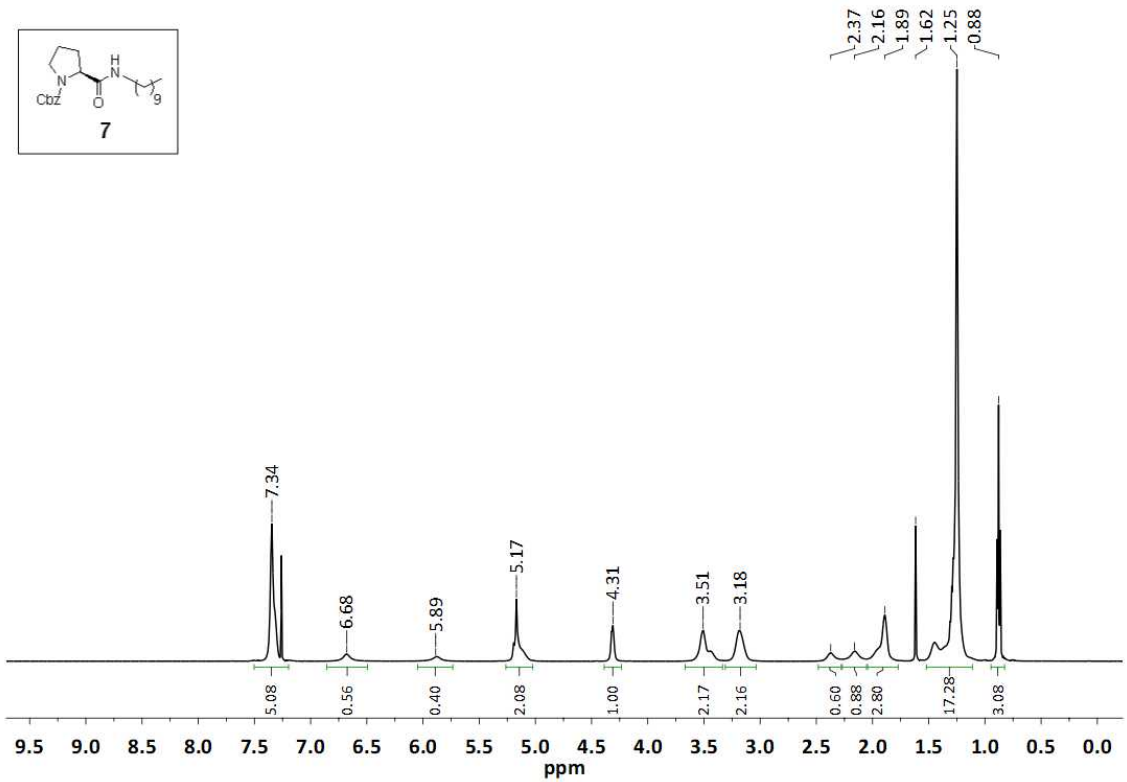

<sup>13</sup>C-NMR (125 MHz, CDCl<sub>3</sub>, rt)

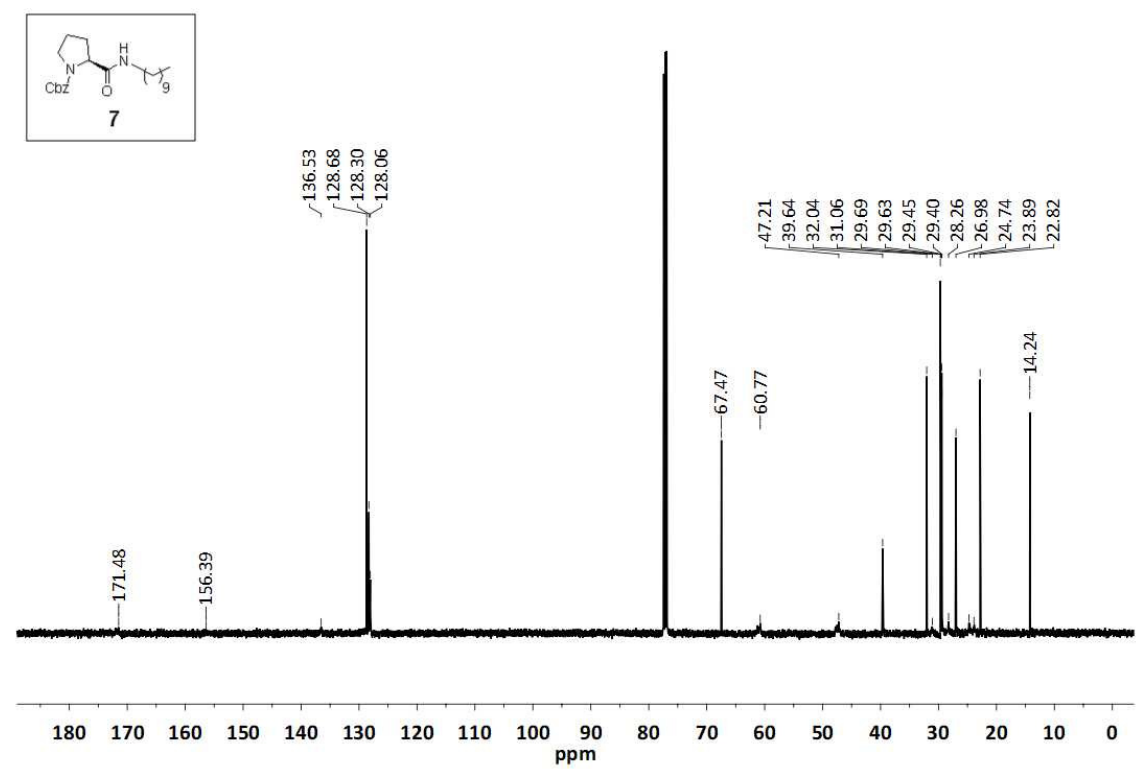

Catalyst 8

<sup>1</sup>H-NMR (500 MHz, CDCl<sub>3</sub>, rt)

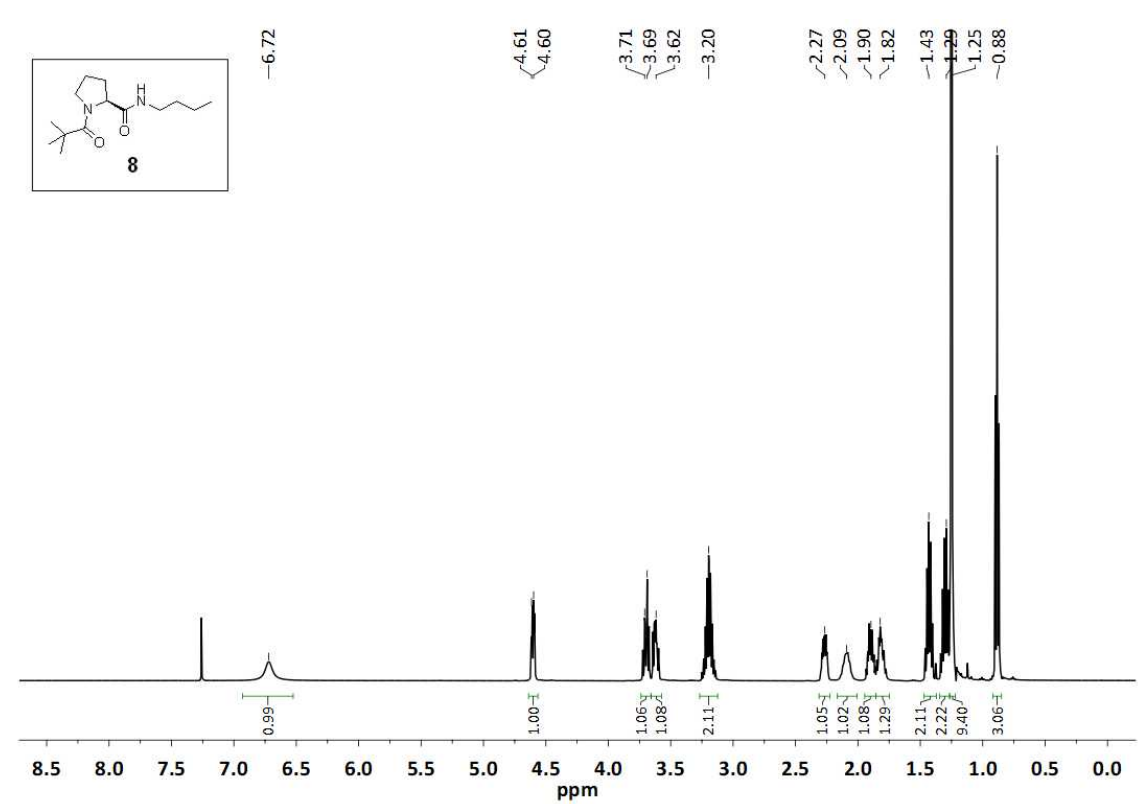

<sup>13</sup>C-NMR (125 MHz, CDCl<sub>3</sub>, rt)

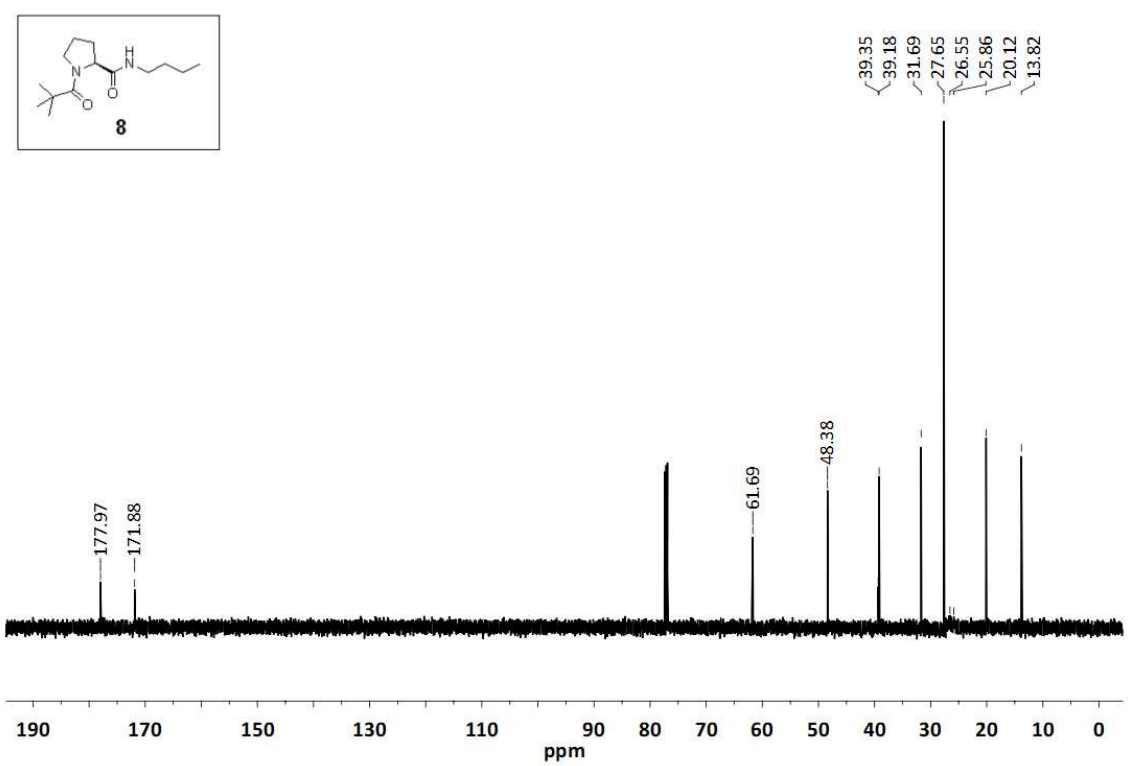

Catalyst 9

<sup>1</sup>H-NMR (500 MHz, CDCl<sub>3</sub>, rt)

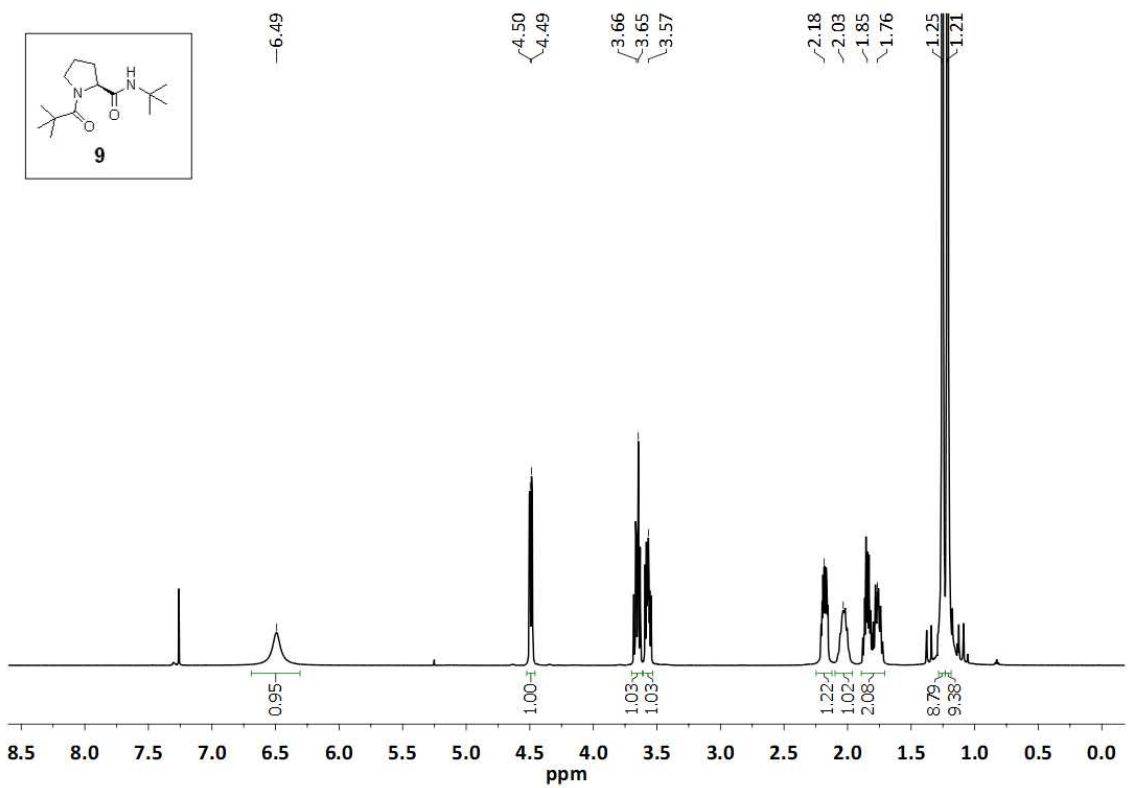

<sup>13</sup>C-NMR (125 MHz, CDCl<sub>3</sub>, rt)

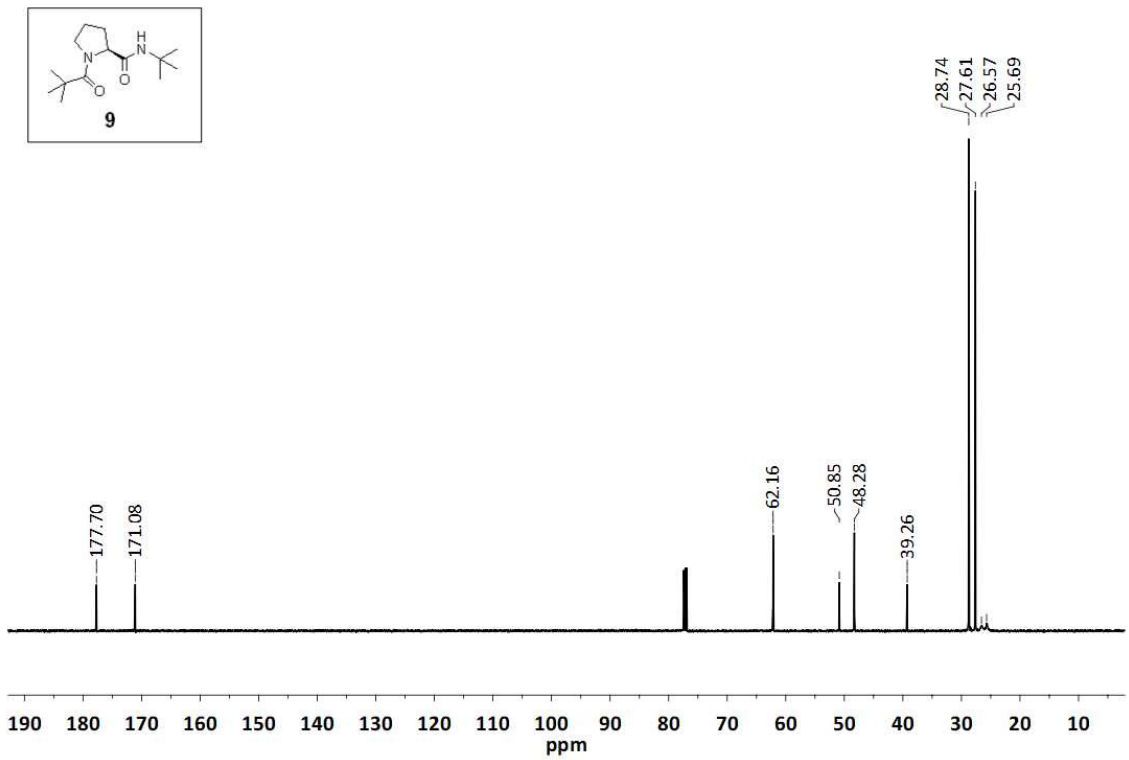

Catalyst 10

<sup>1</sup>H-NMR (500 MHz, CDCl<sub>3</sub>, rt)

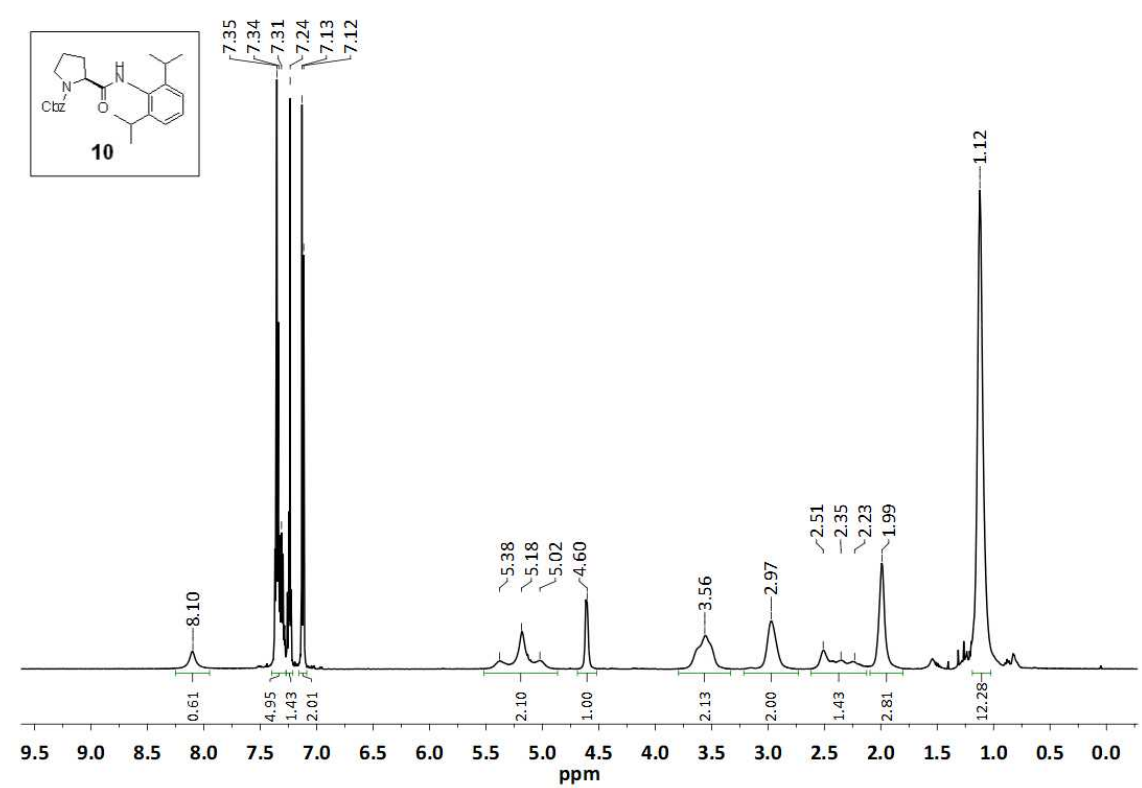

<sup>13</sup>C-NMR (125 MHz, CDCl<sub>3</sub>, rt)



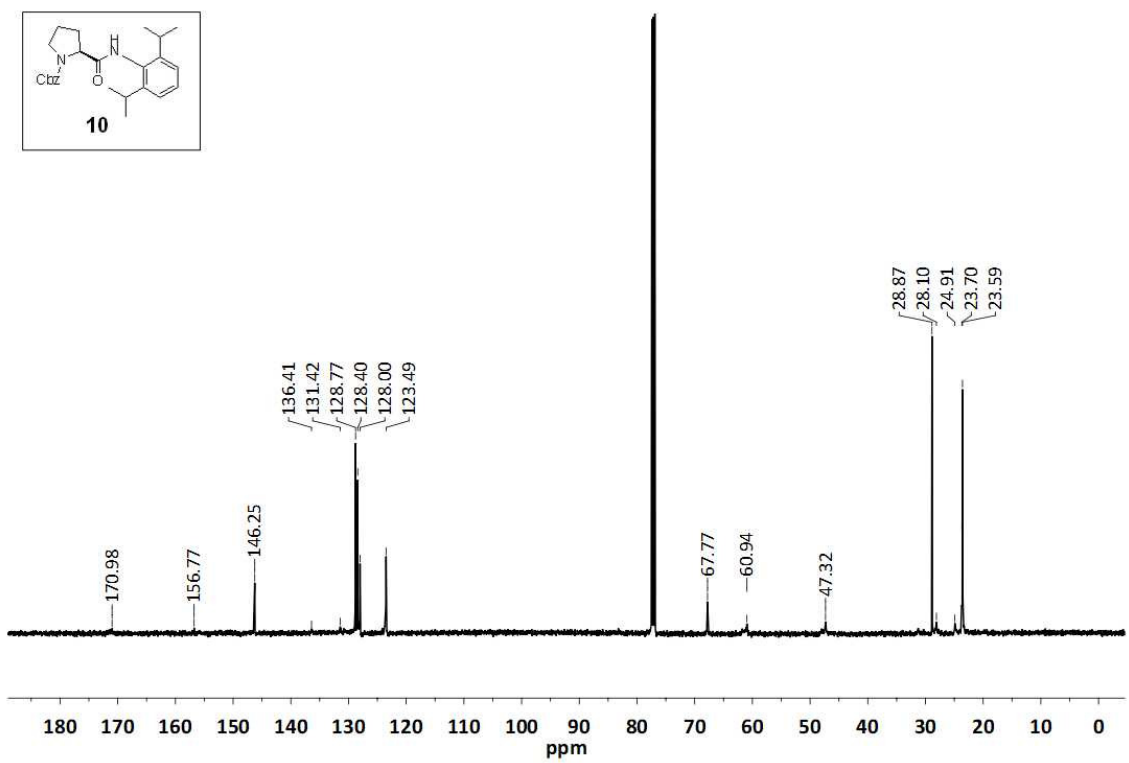

Catalyst 11

<sup>1</sup>H-NMR (500 MHz, CDCl<sub>3</sub>, rt)

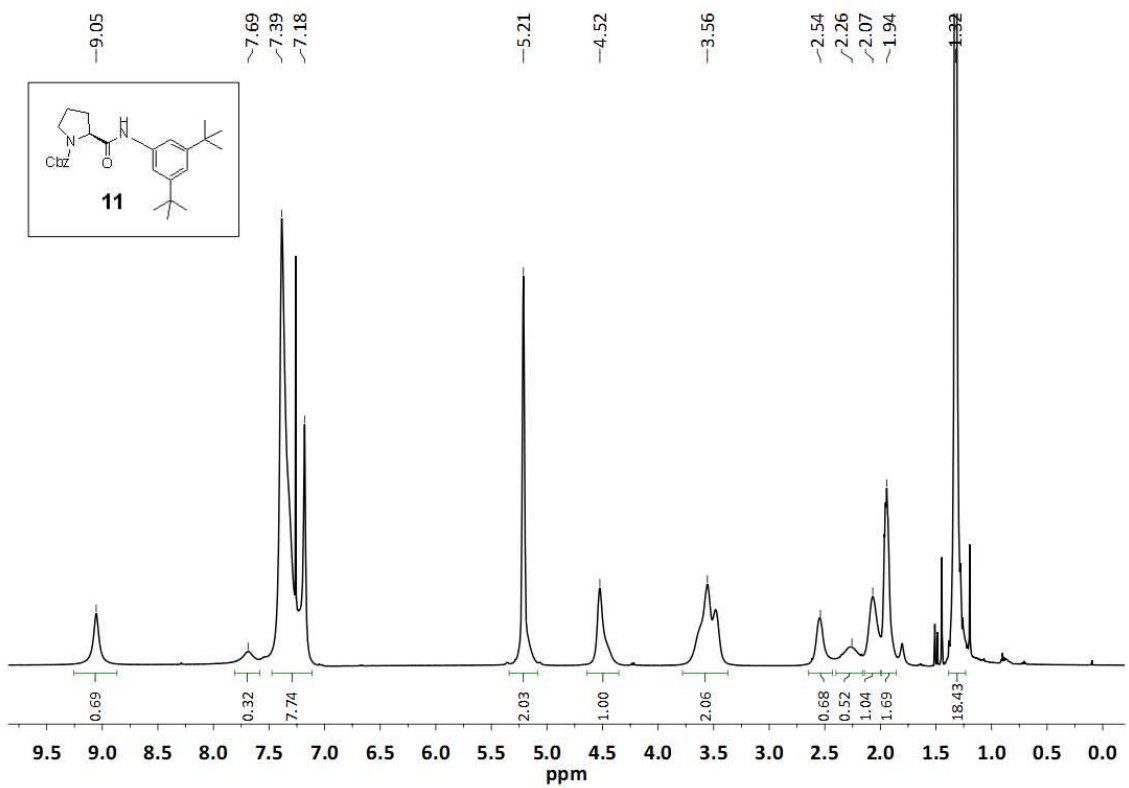

<sup>13</sup>C-NMR (125 MHz, CDCl<sub>3</sub>, rt)

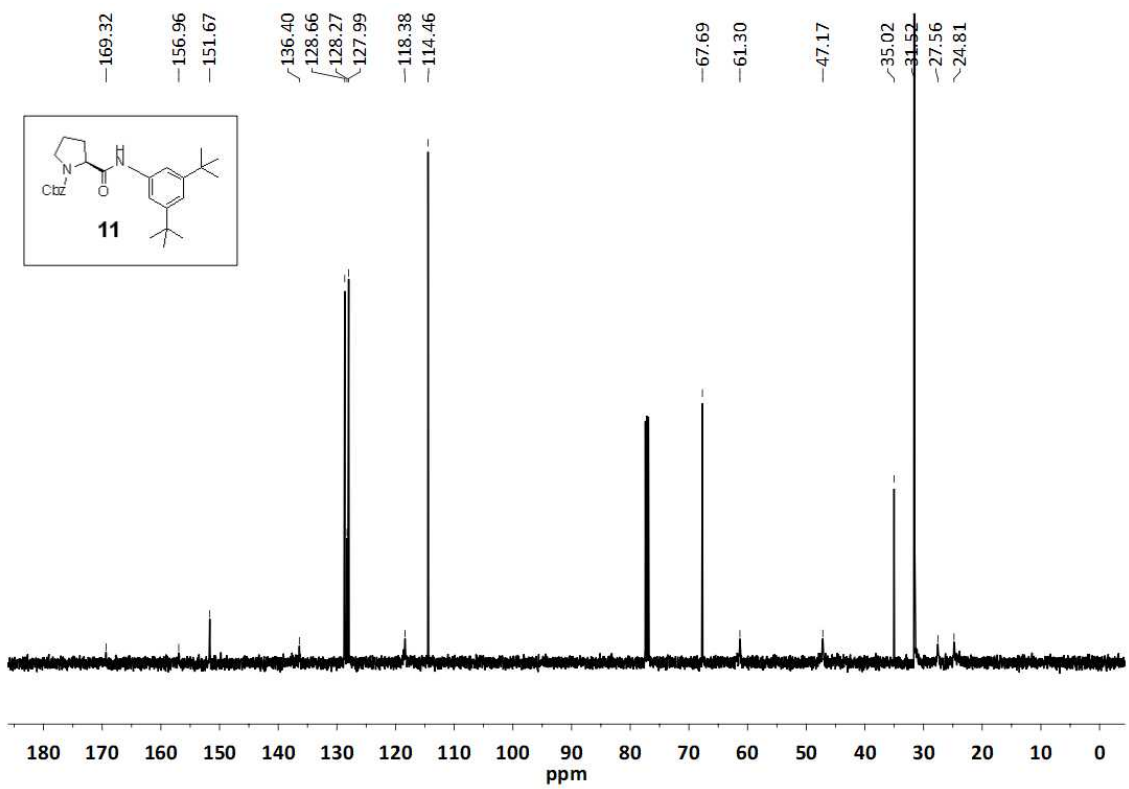

Catalyst 12

<sup>1</sup>H-NMR (500 MHz, CDCl<sub>3</sub>, rt)

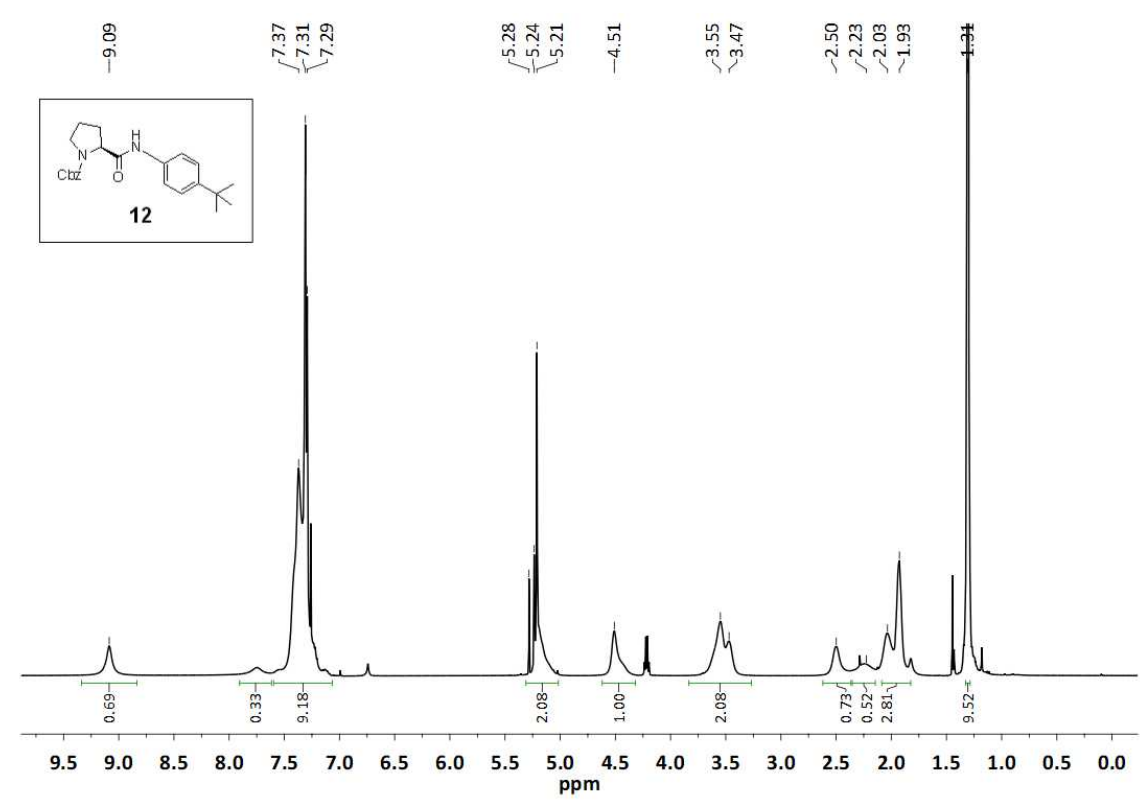

<sup>13</sup>C-NMR (125 MHz, CDCl<sub>3</sub>, rt)

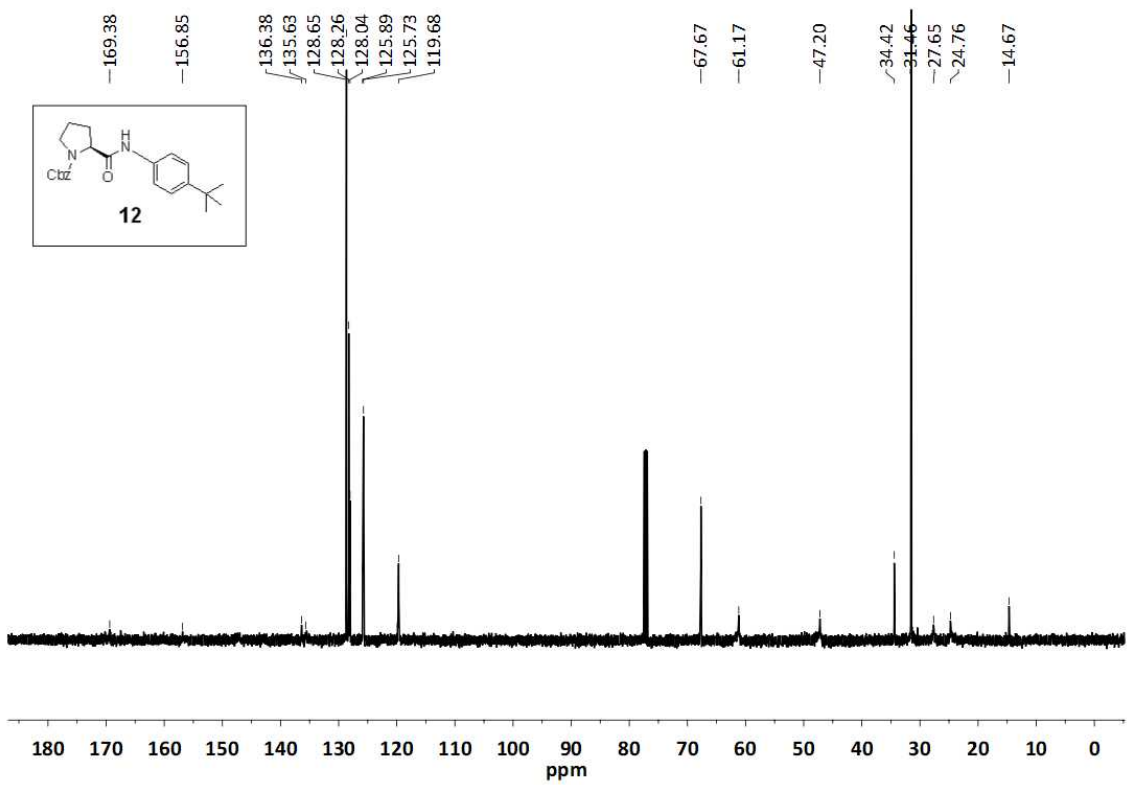

Catalyst 13

<sup>1</sup>H-NMR (500 MHz, CDCl<sub>3</sub>, rt)

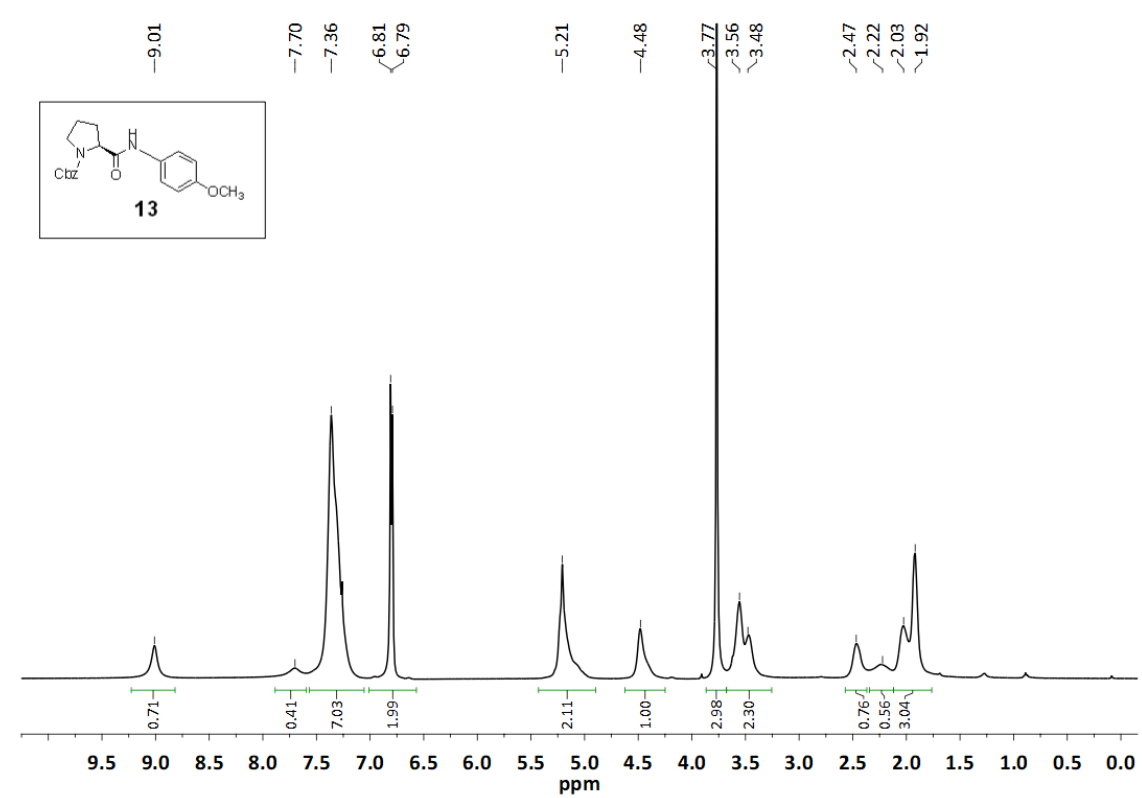

<sup>13</sup>C-NMR (125 MHz, CDCl<sub>3</sub>, rt)

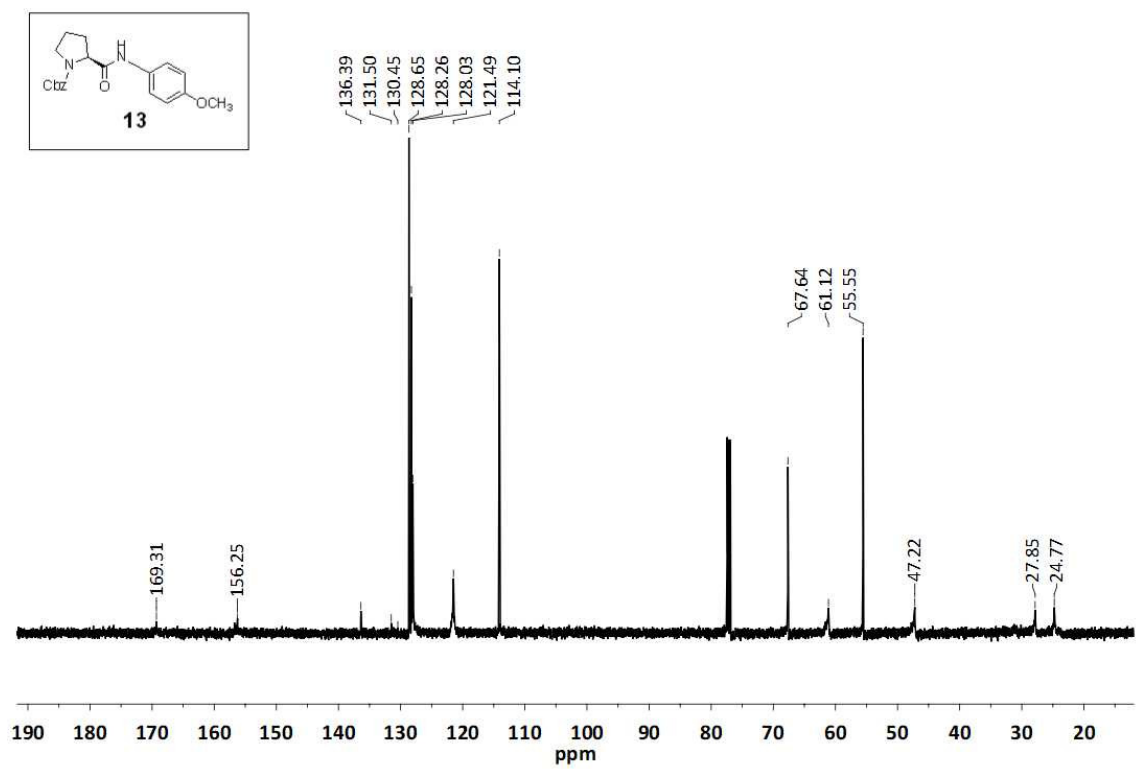

Catalyst 14

<sup>1</sup>H-NMR (500 MHz, CDCl<sub>3</sub>, rt)

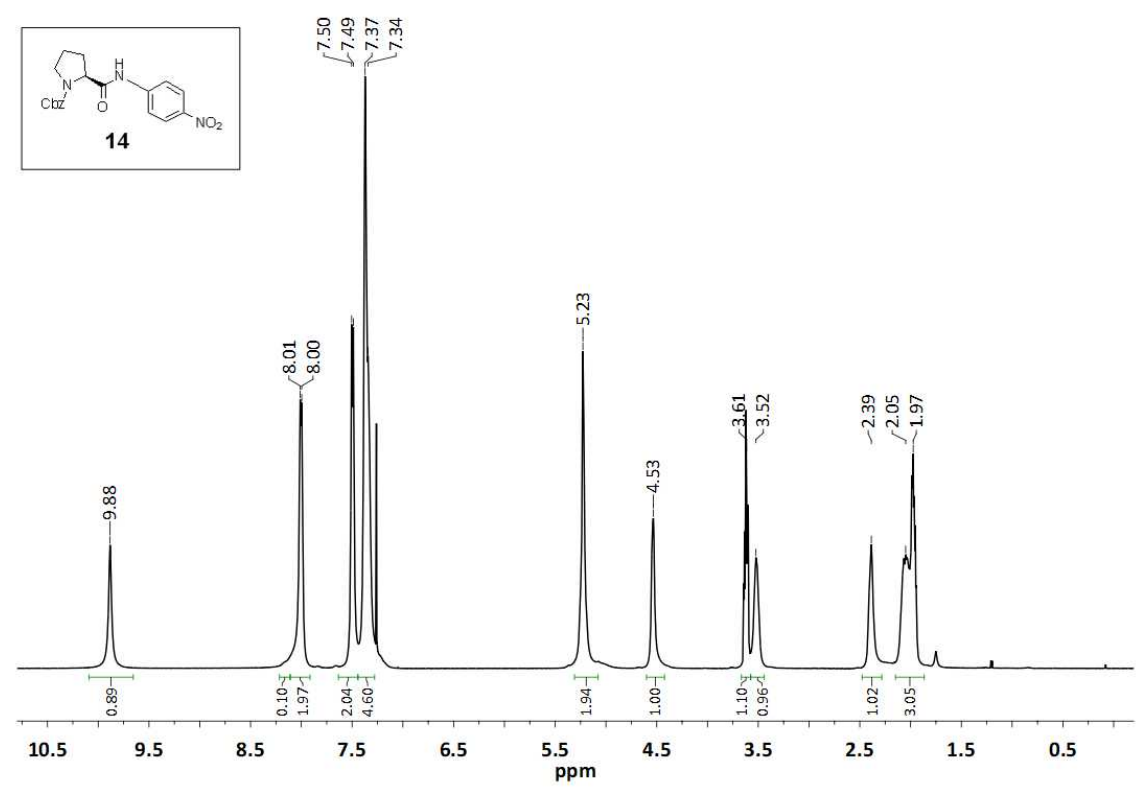

<sup>13</sup>C-NMR (125 MHz, CDCl<sub>3</sub>, rt)



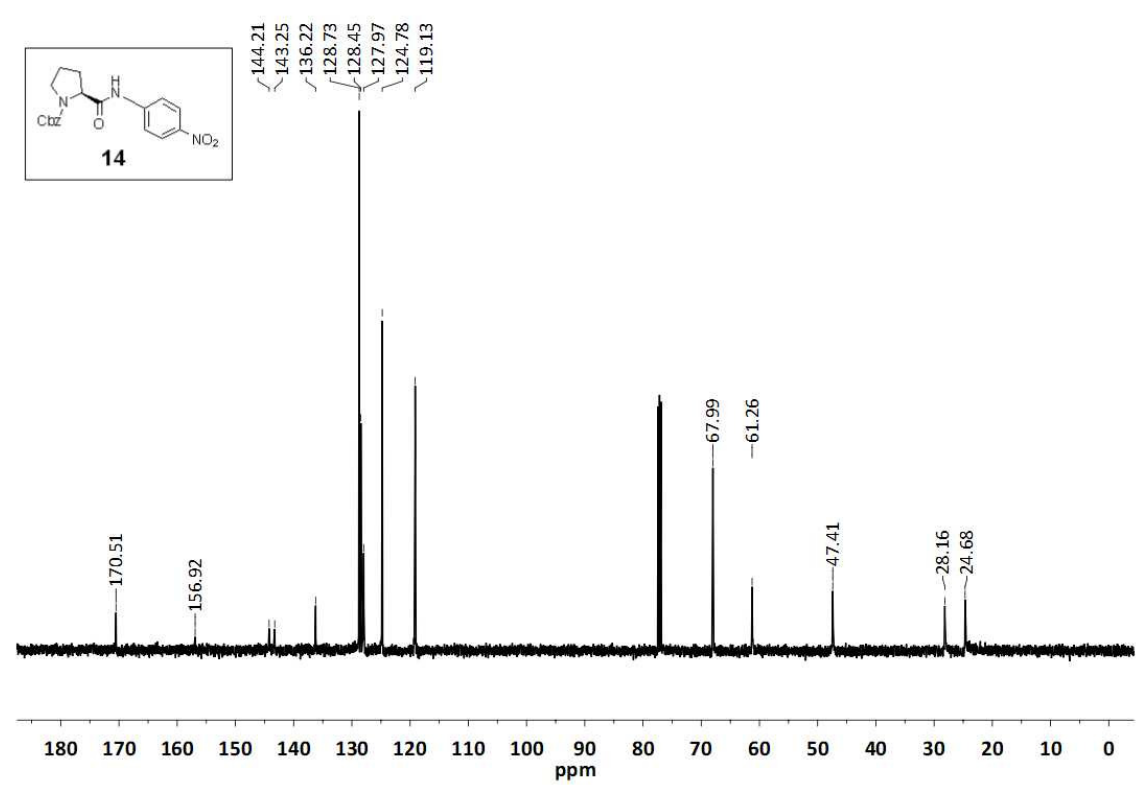

Catalyst 15

<sup>1</sup>H-NMR (500 MHz, CDCl<sub>3</sub>, rt)

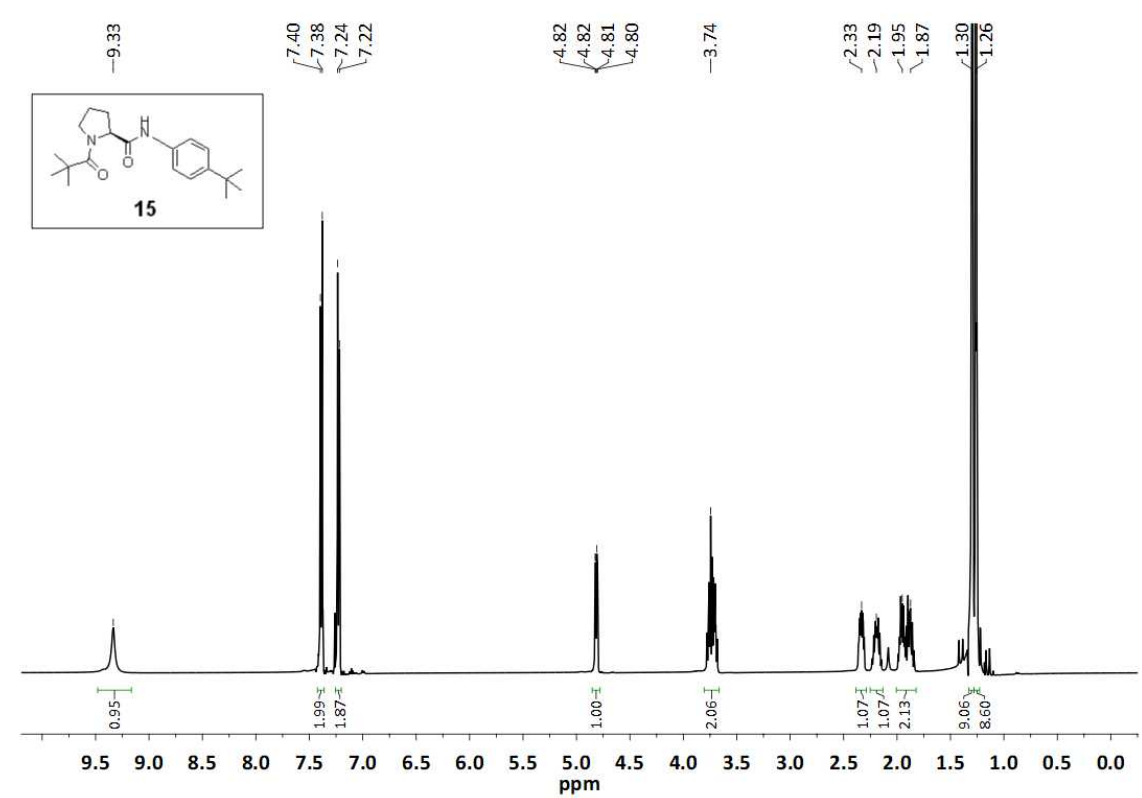

<sup>13</sup>C-NMR (125 MHz, CDCl<sub>3</sub>, rt)

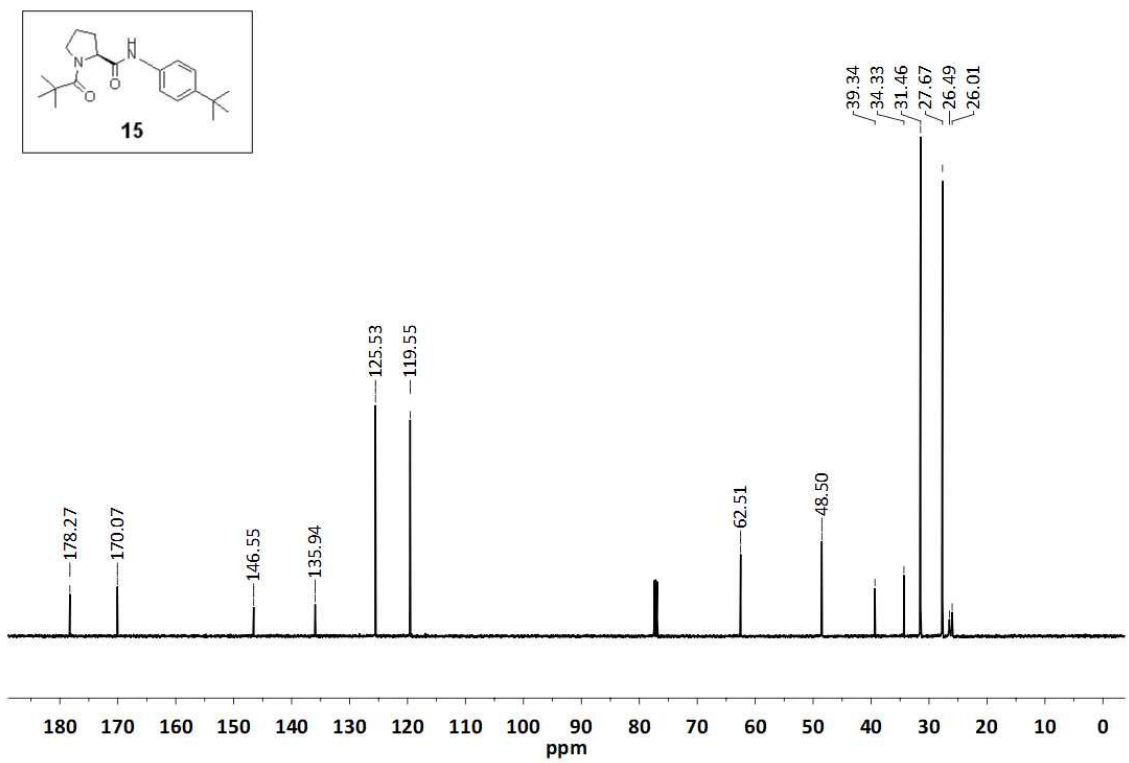

Catalyst 16

<sup>1</sup>H-NMR (500 MHz, CDCl<sub>3</sub>, rt)

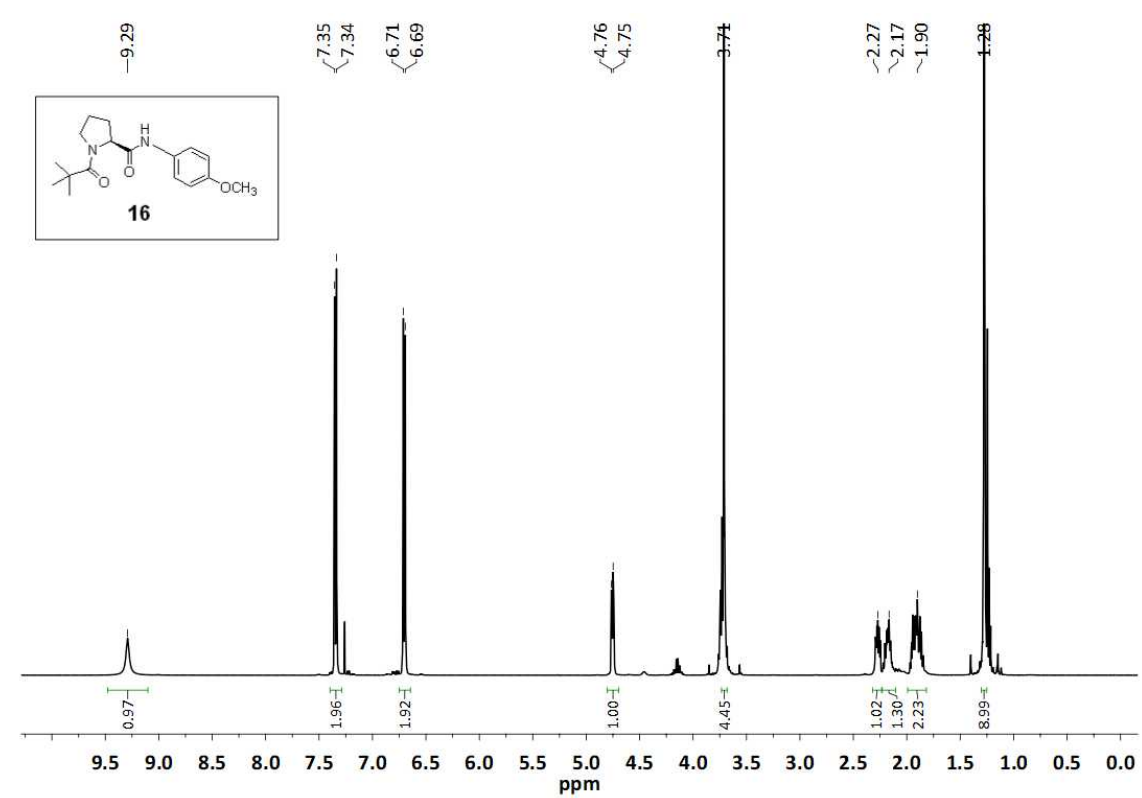

<sup>13</sup>C-NMR (125 MHz, CDCl<sub>3</sub>, rt)

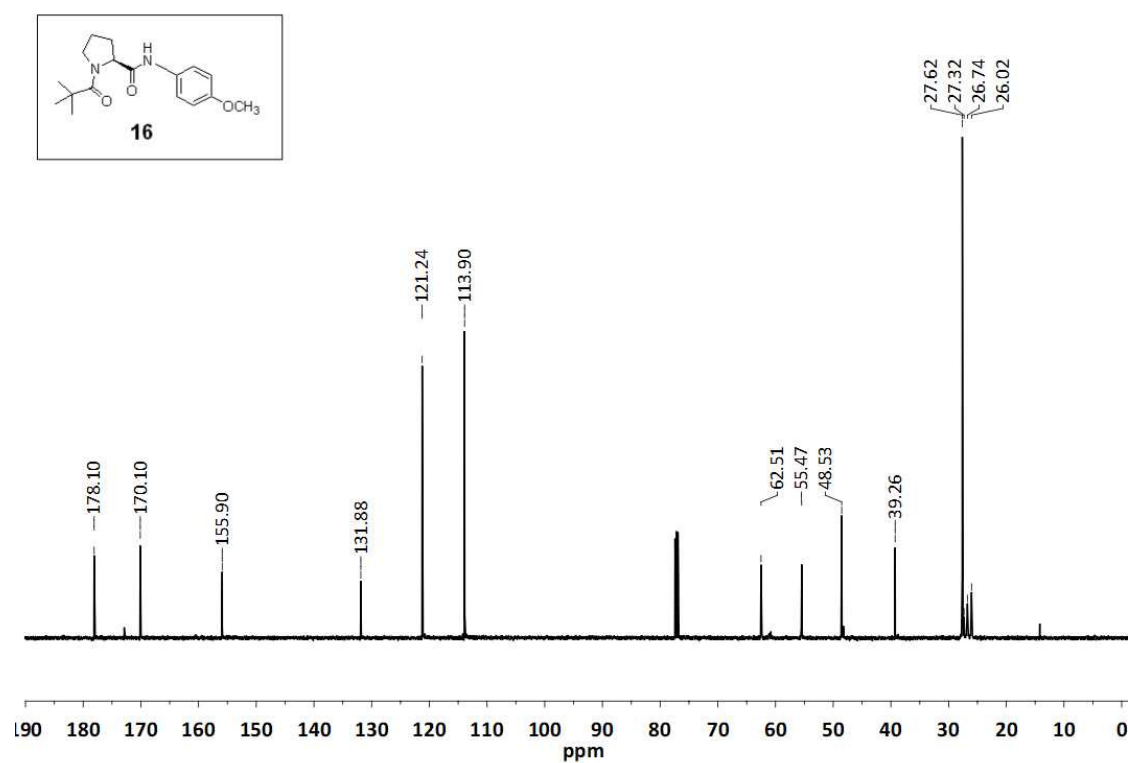

## 5. References

- [1] Chen, J.; Chen, X.; Zhang, Z.; Bao, Z.; Xing, H.; Yang, Q.; Ren, Q. MIL-101(Cr) as a synergistic catalyst for the reduction of imines with trichlorosilane. *Mol. Catal.* **2018**, *445*, 163–169.
- [2] Gaussian 09, Revision B.01, M. J. Frisch, G. W. Trucks, H. B. Schlegel, G. E. Scuseria, M. A. Robb, J. R. Cheeseman, G. Scalmani, V. Barone, B. Mennucci, G. A. Petersson, H. Nakatsuji, M. Caricato, X. Li, H. P. Hratchian, A. F. Izmaylov, J. Bloino, G. Zheng, J. L. Sonnenberg, M. Hada, M. Ehara, K. Toyota, R. Fukuda, J. Hasegawa, M. Ishida, T. Nakajima, Y. Honda, O. Kitao, H. Nakai, T. Vreven, J. A. Montgomery, Jr., J. E. Peralta, F. Ogliaro, M. Bearpark, J. J. Heyd, E. Brothers, K. N. Kudin, V. N. Staroverov, T. Keith, R. Kobayashi, J. Normand, K. Raghavachari, A. Rendell, J. C. Burant, S. S. Iyengar, J. Tomasi, M. Cossi, N. Rega, J. M. Millam, M. Klene, J. E. Knox, J. B. Cross, V. Bakken, C. Adamo, J. Jaramillo, R. Gomperts, R. E. Stratmann, O. Yazyev, A. J. Austin, R. Cammi, C. Pomelli, J. W. Ochterski, R. L. Martin, K. Morokuma, V. G. Zakrzewski, G. A. Voth, P. Salvador, J. J. Dannenberg, S. Dapprich, A. D. Daniels, O. Farkas, J. B. Foresman, J. V. Ortiz, J. Cioslowski, and D. J. Fox, Gaussian, Inc., Wallingford CT, 2010.
